# Supplementary material for: Unprecedented one-pot multicomponent synthesis of propargylamines using Amberlyst A-21 supported CuI under solvent-free conditions
Source: Royal Society of Chemistry journal article supplement (doi:10.1039/c5ra05546f), 2015-01-01

## Supporting Information

### Product 4a – $^1\text{H}$ Spectrum

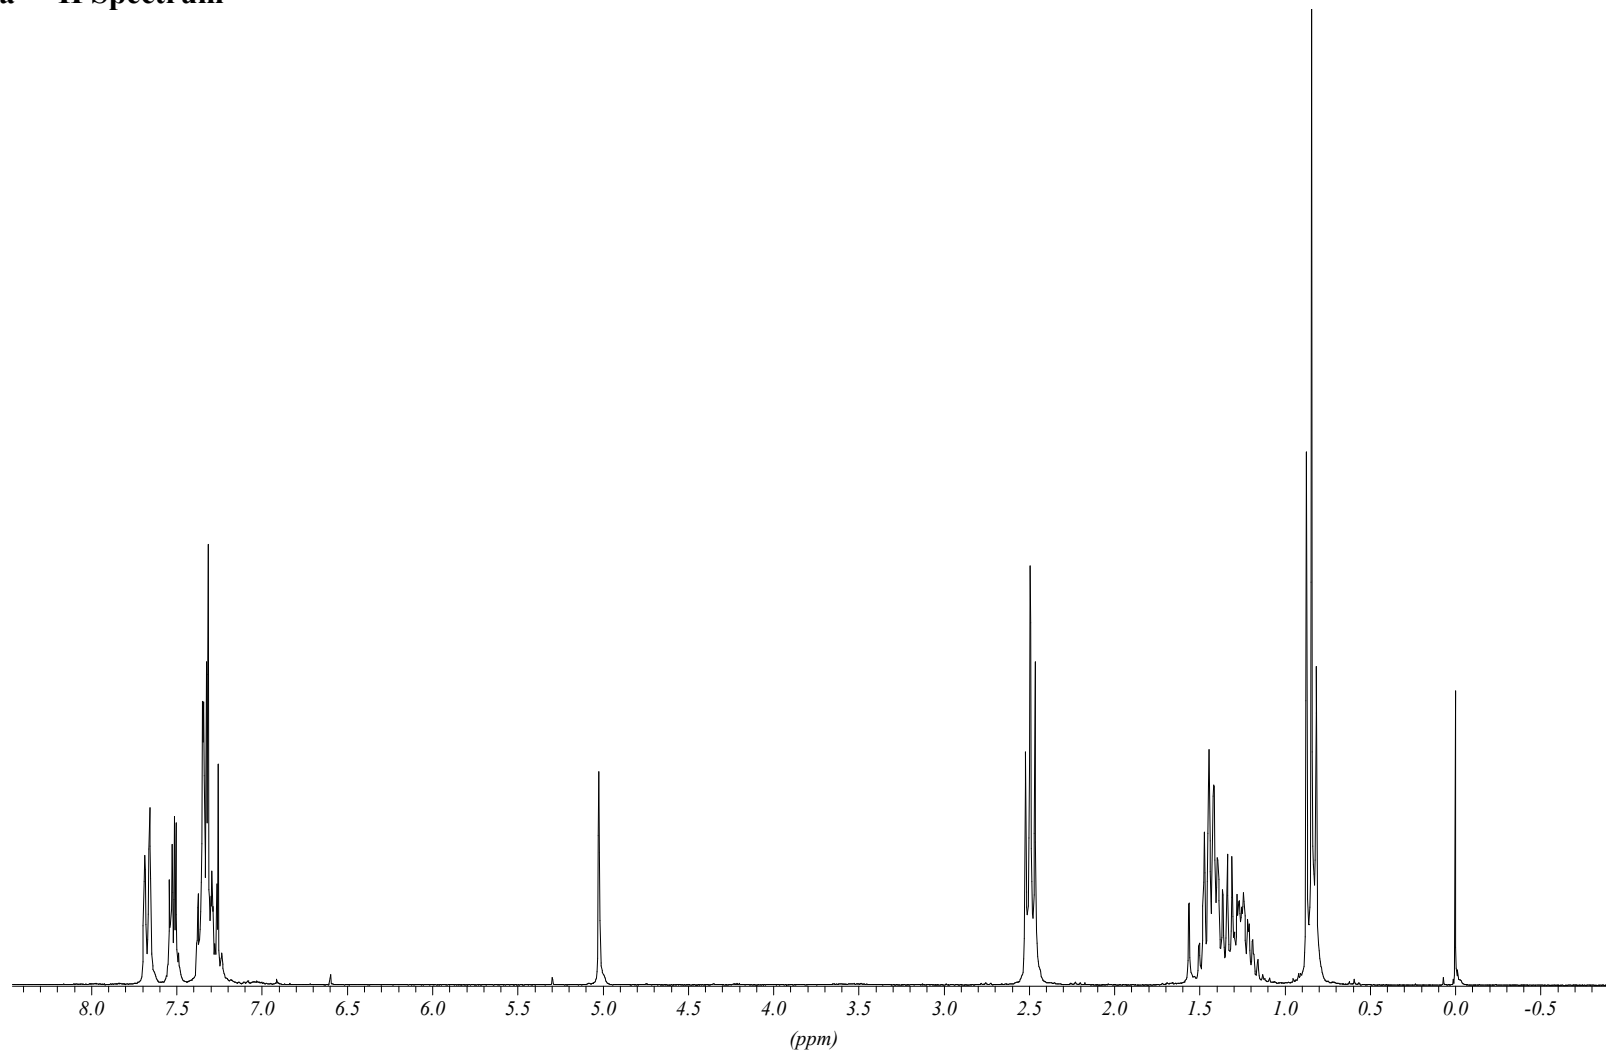

# Product 4a – $^{13}\text{C}$ Spectrum

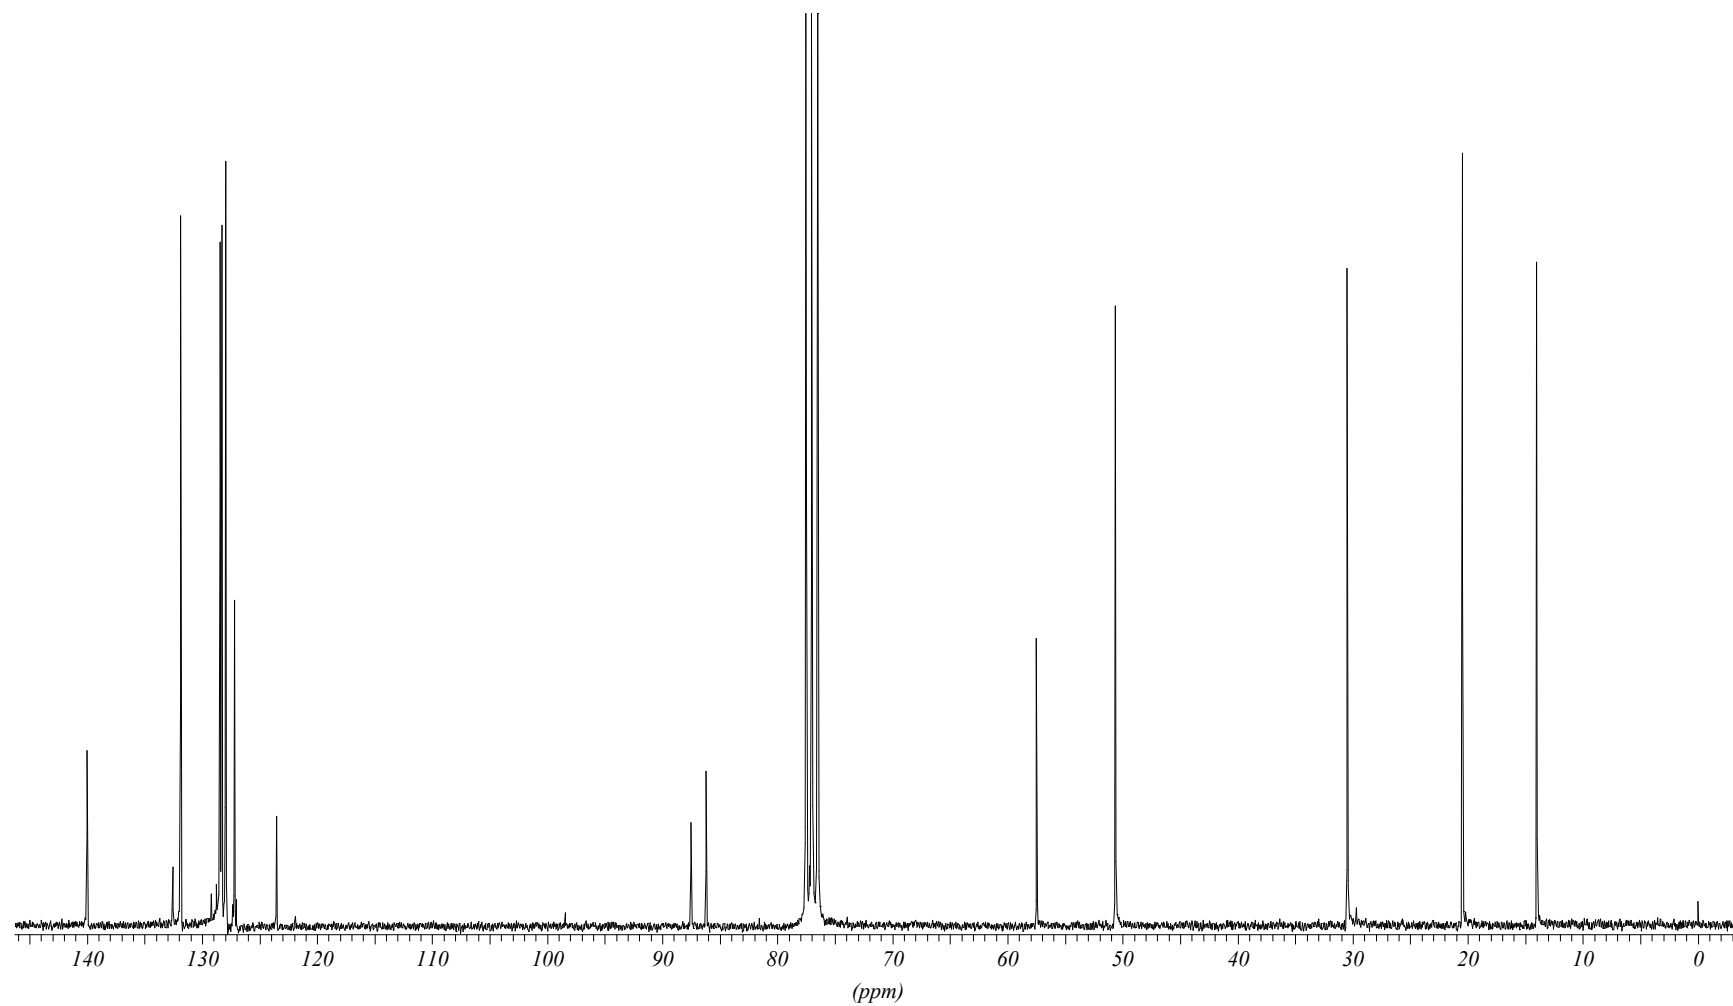

# Product 4a – DEPT Spectrum

*Separate Plot*

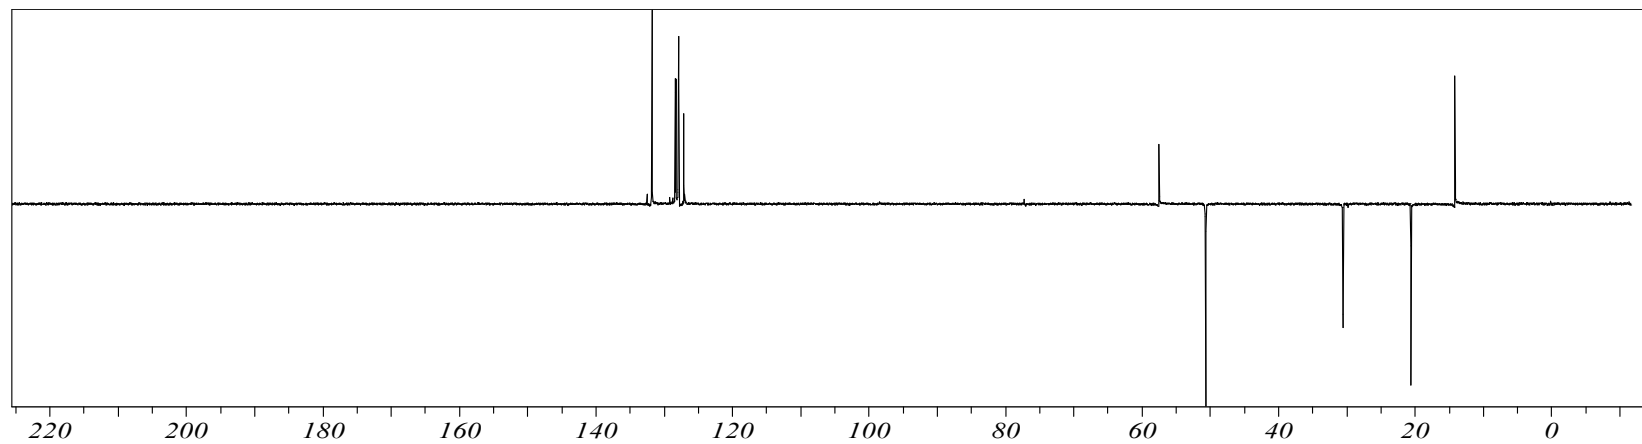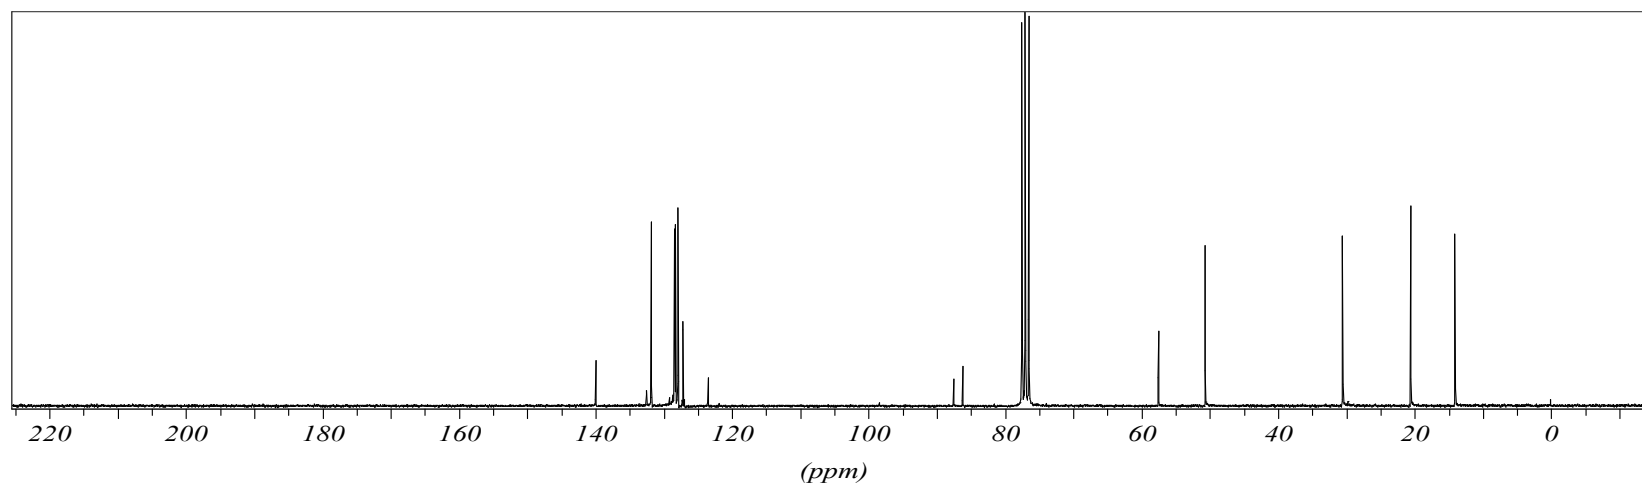

**Product 4a – IR Spectrum**

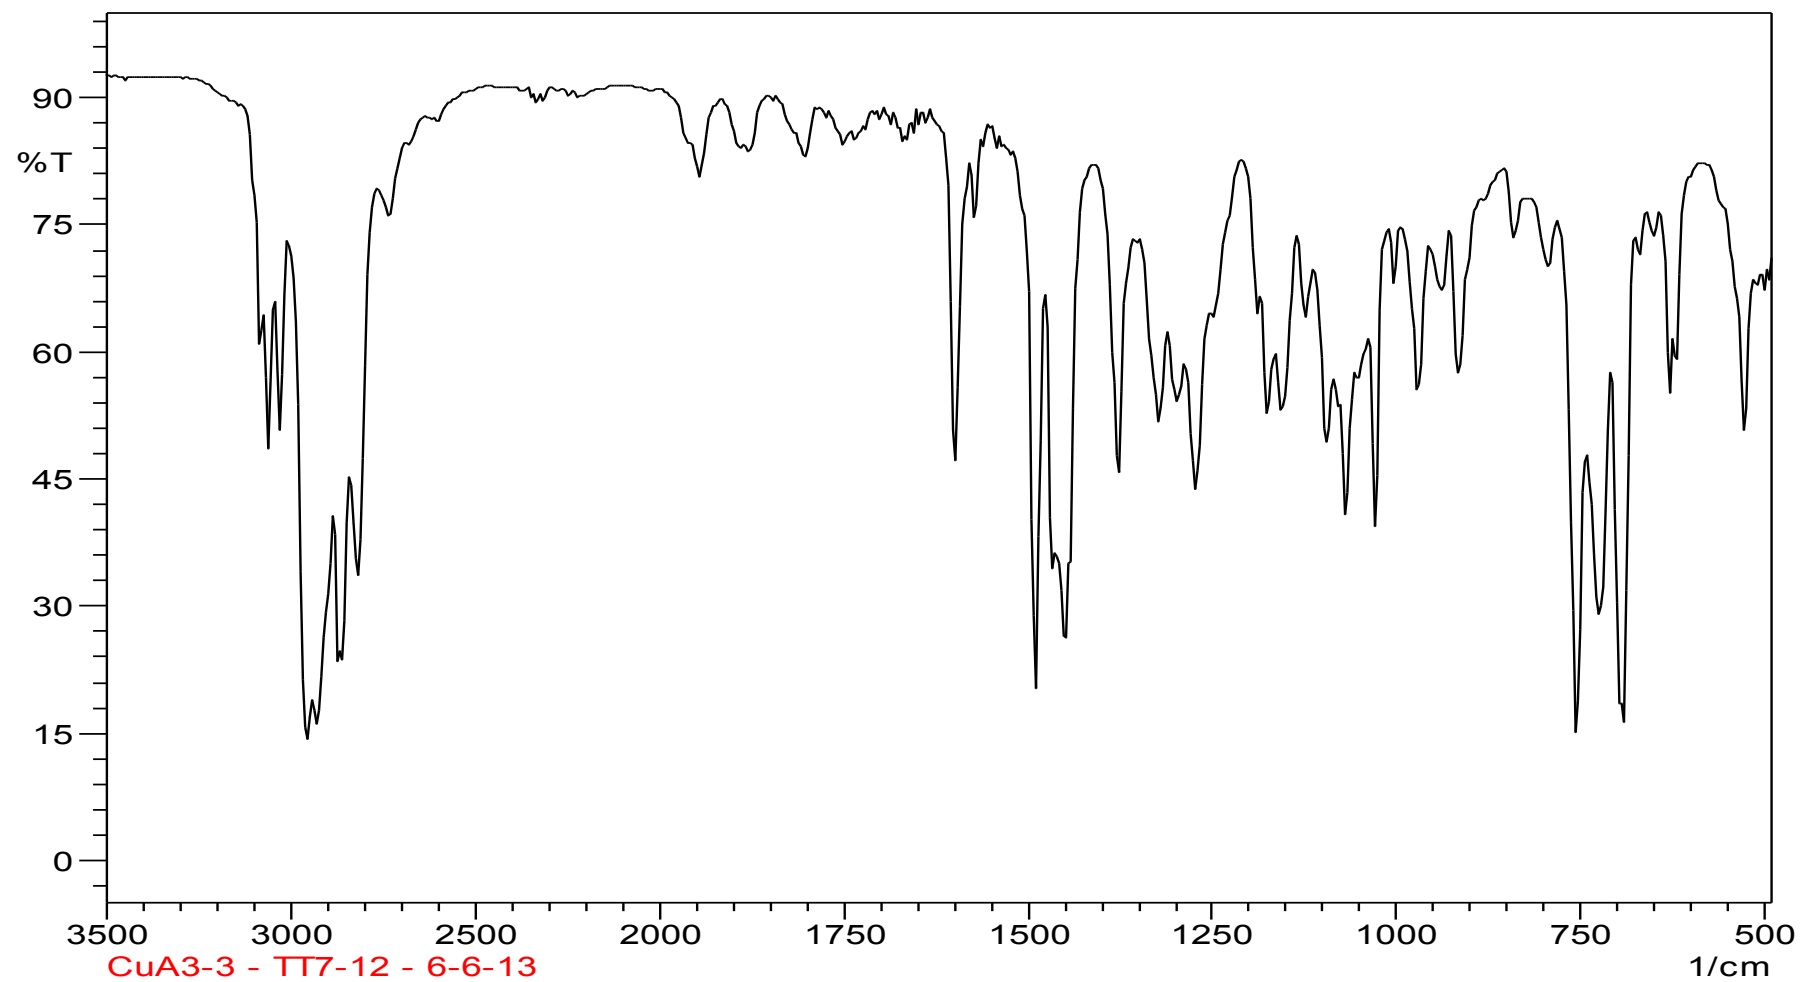

**Product 4b – <sup>1</sup>H Spectrum**

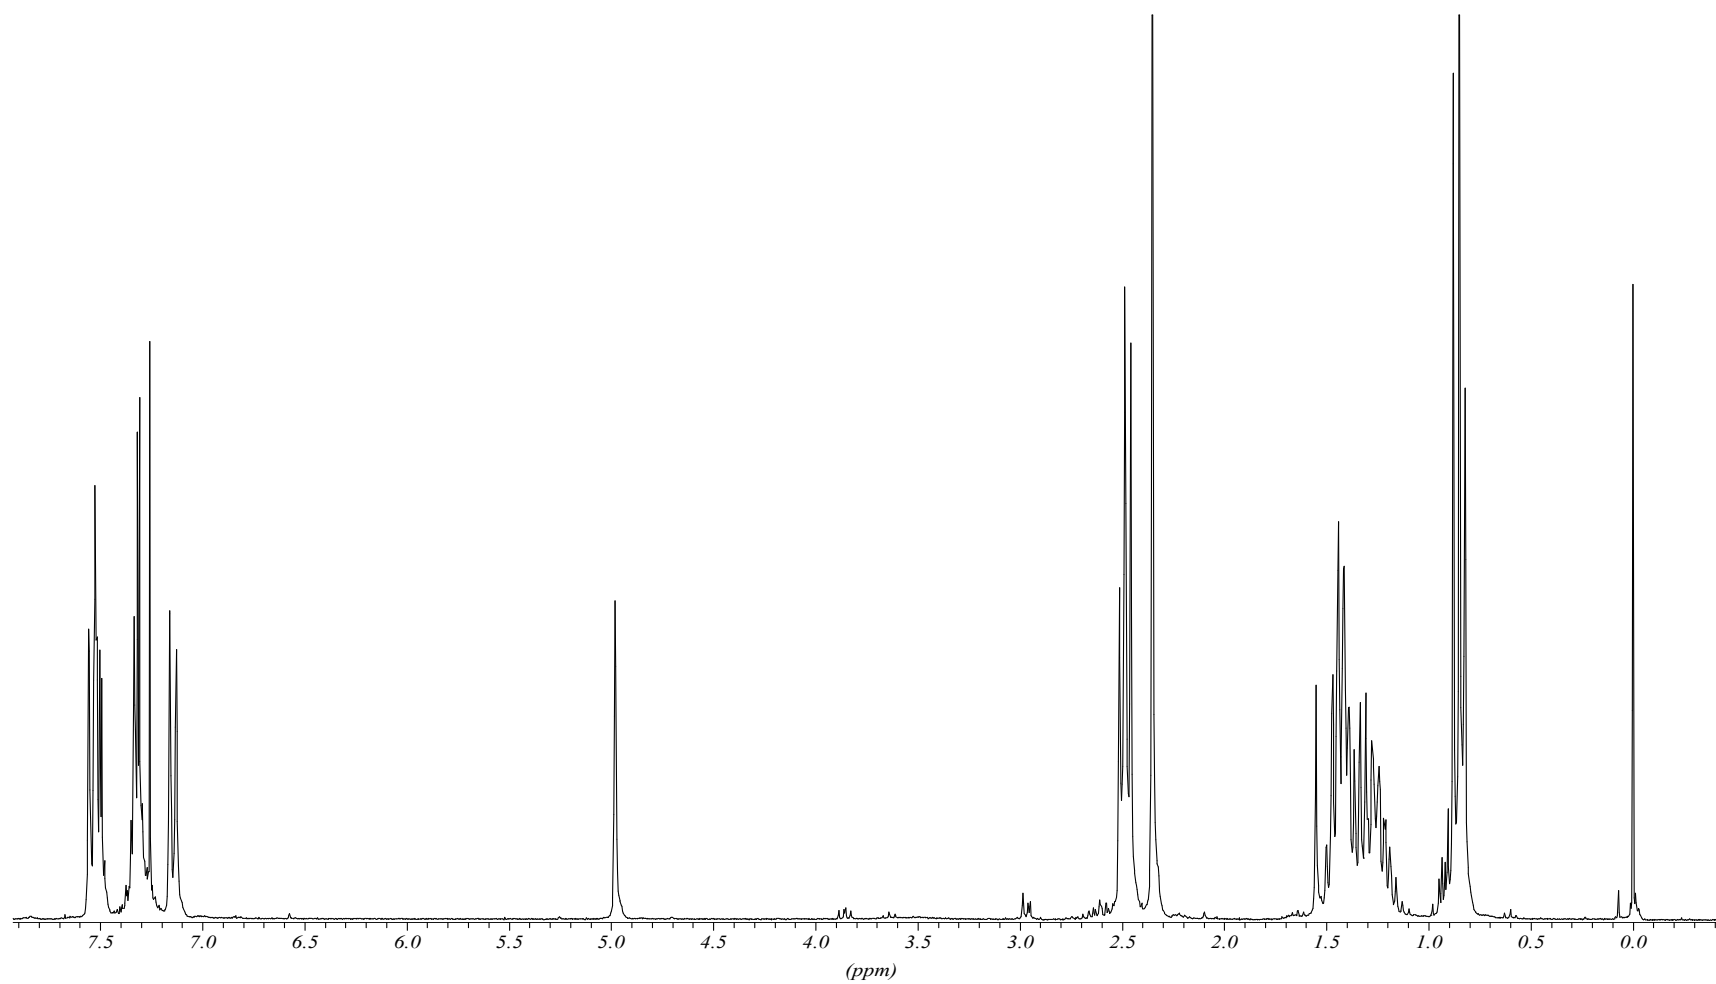

**Product 4b – <sup>13</sup>C Spectrum**

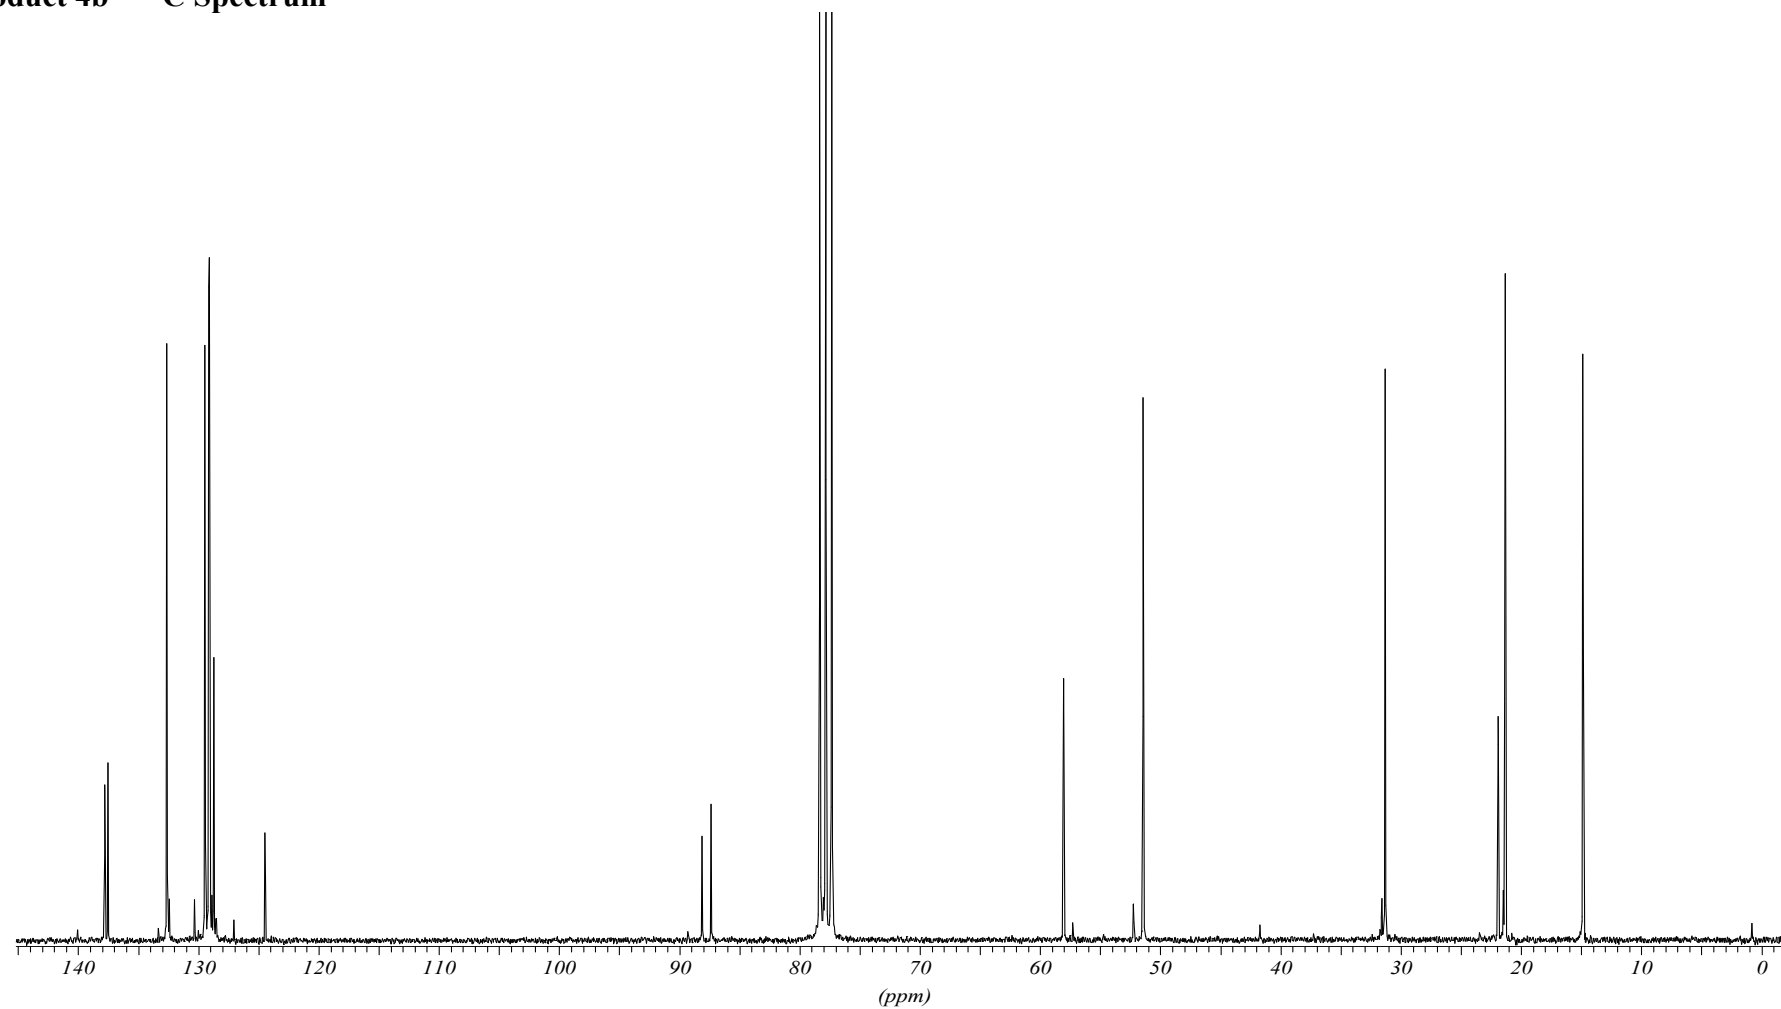

**Product 4b – IR Spectrum**

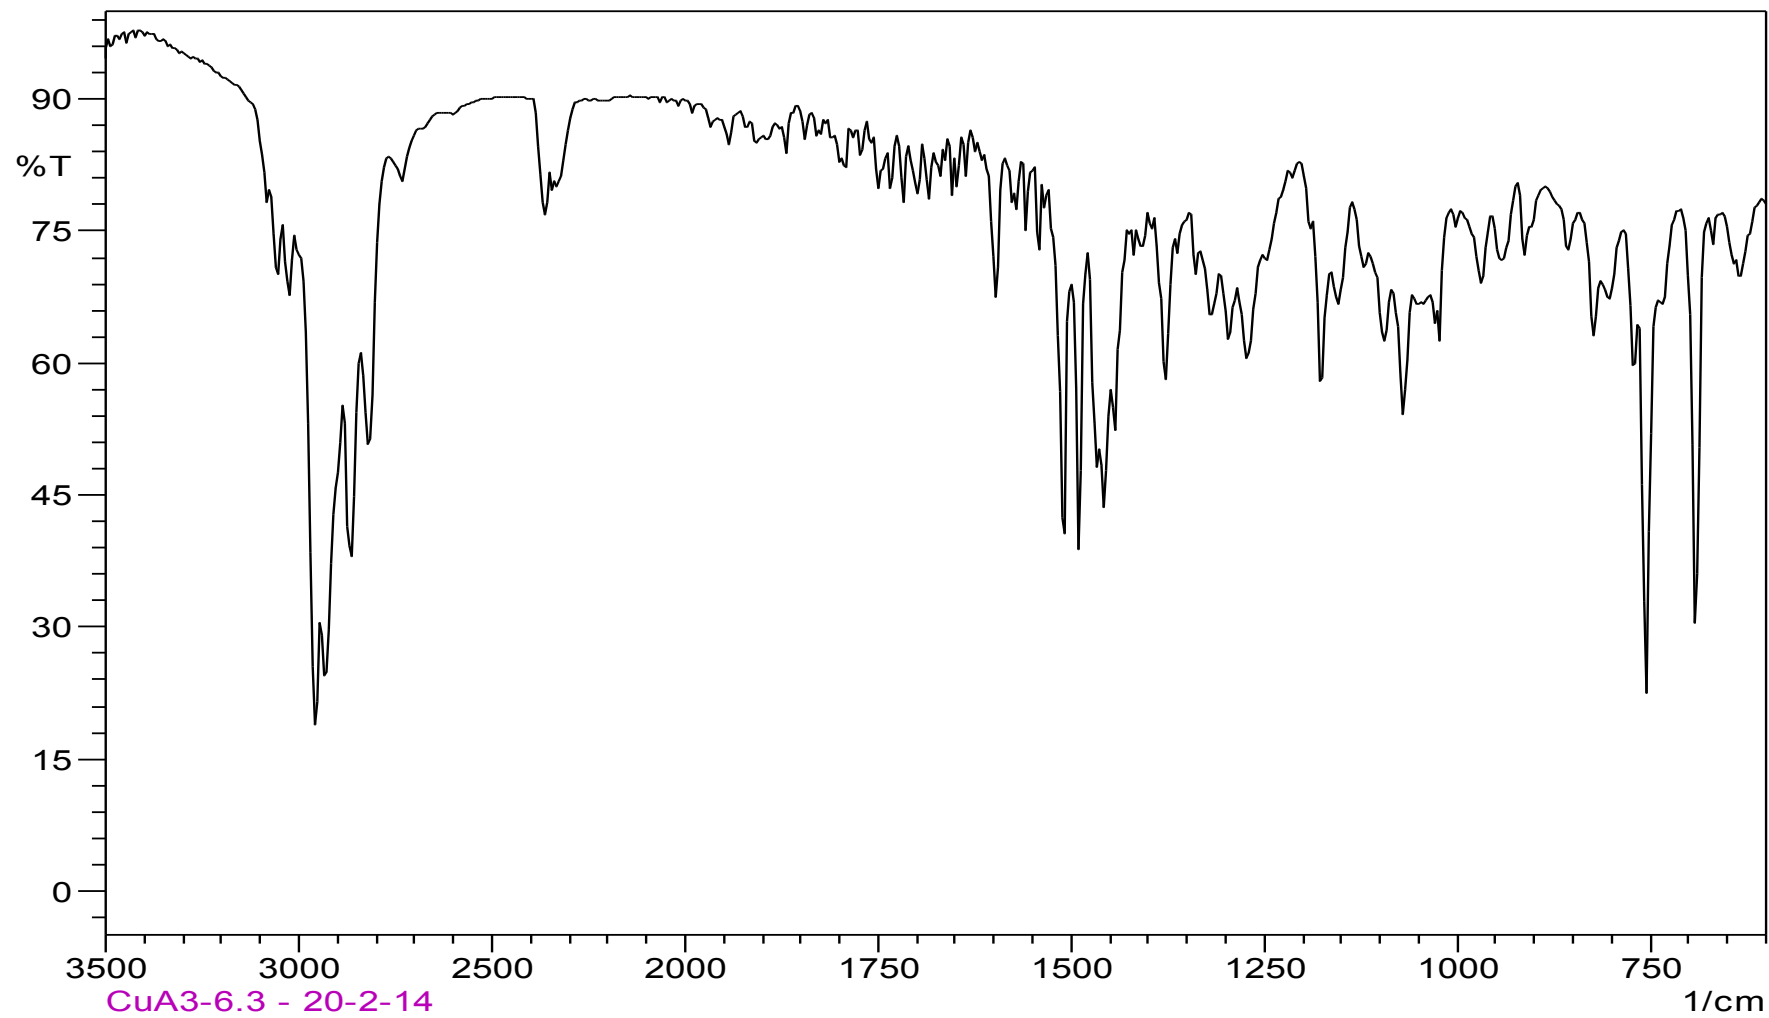

# Product 4b – GC-MS Spectrum

RT: 0.00 - 29.01

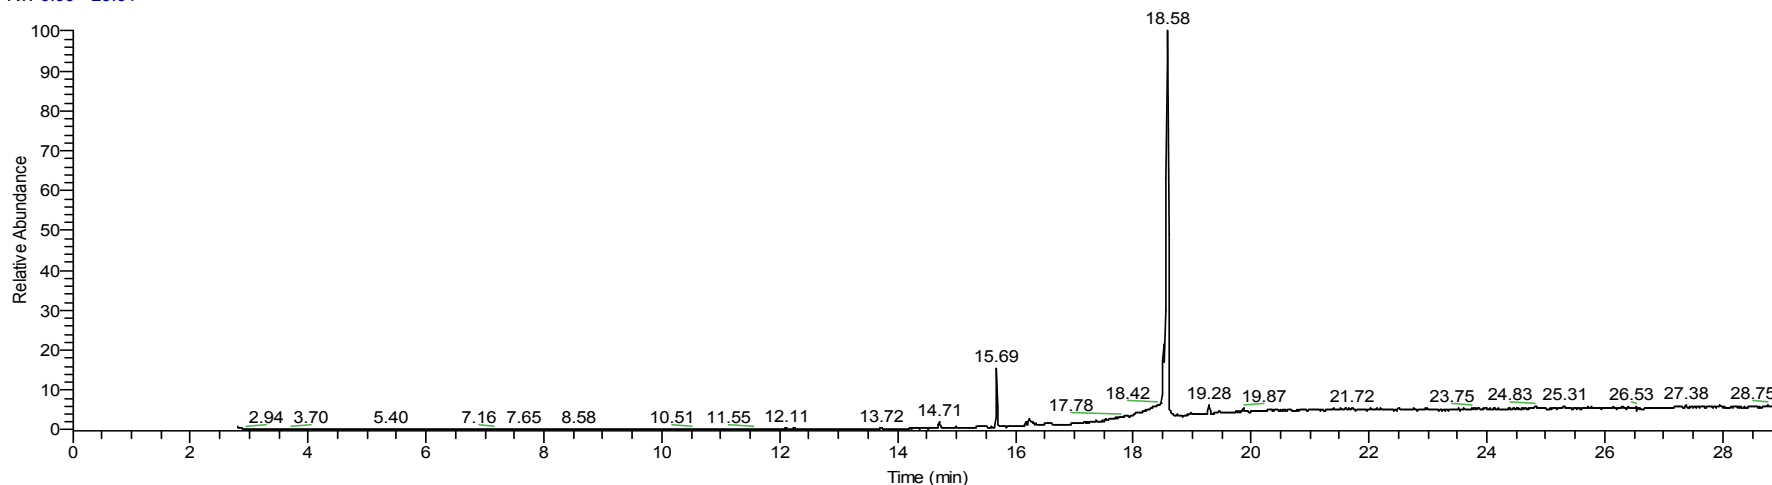

NL:  
2.93E7  
TIC F: MS  
CuA3-62r1

CuA3-62r1 #1240 RT: 18.53 AV: 1 SB: 2 19.59, 27.23 NL: 7.37E5  
T: + c Full ms [ 30.00-400.00]

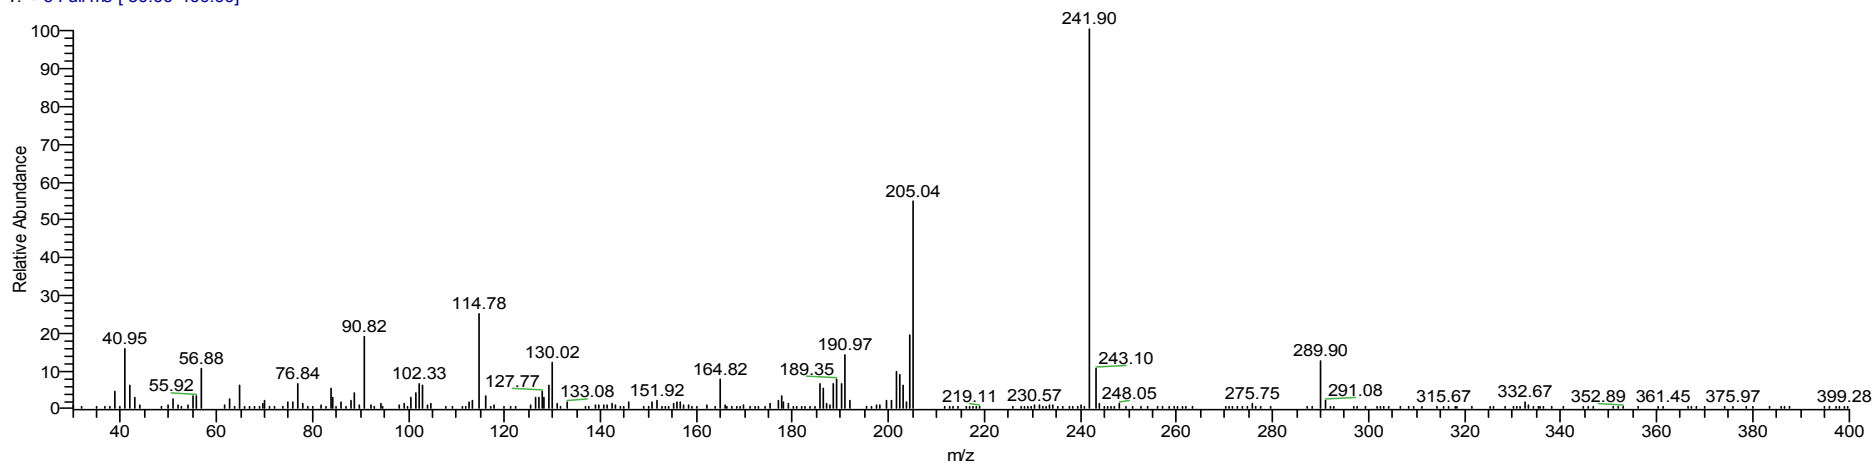



**Product 4c – <sup>1</sup>H Spectrum**

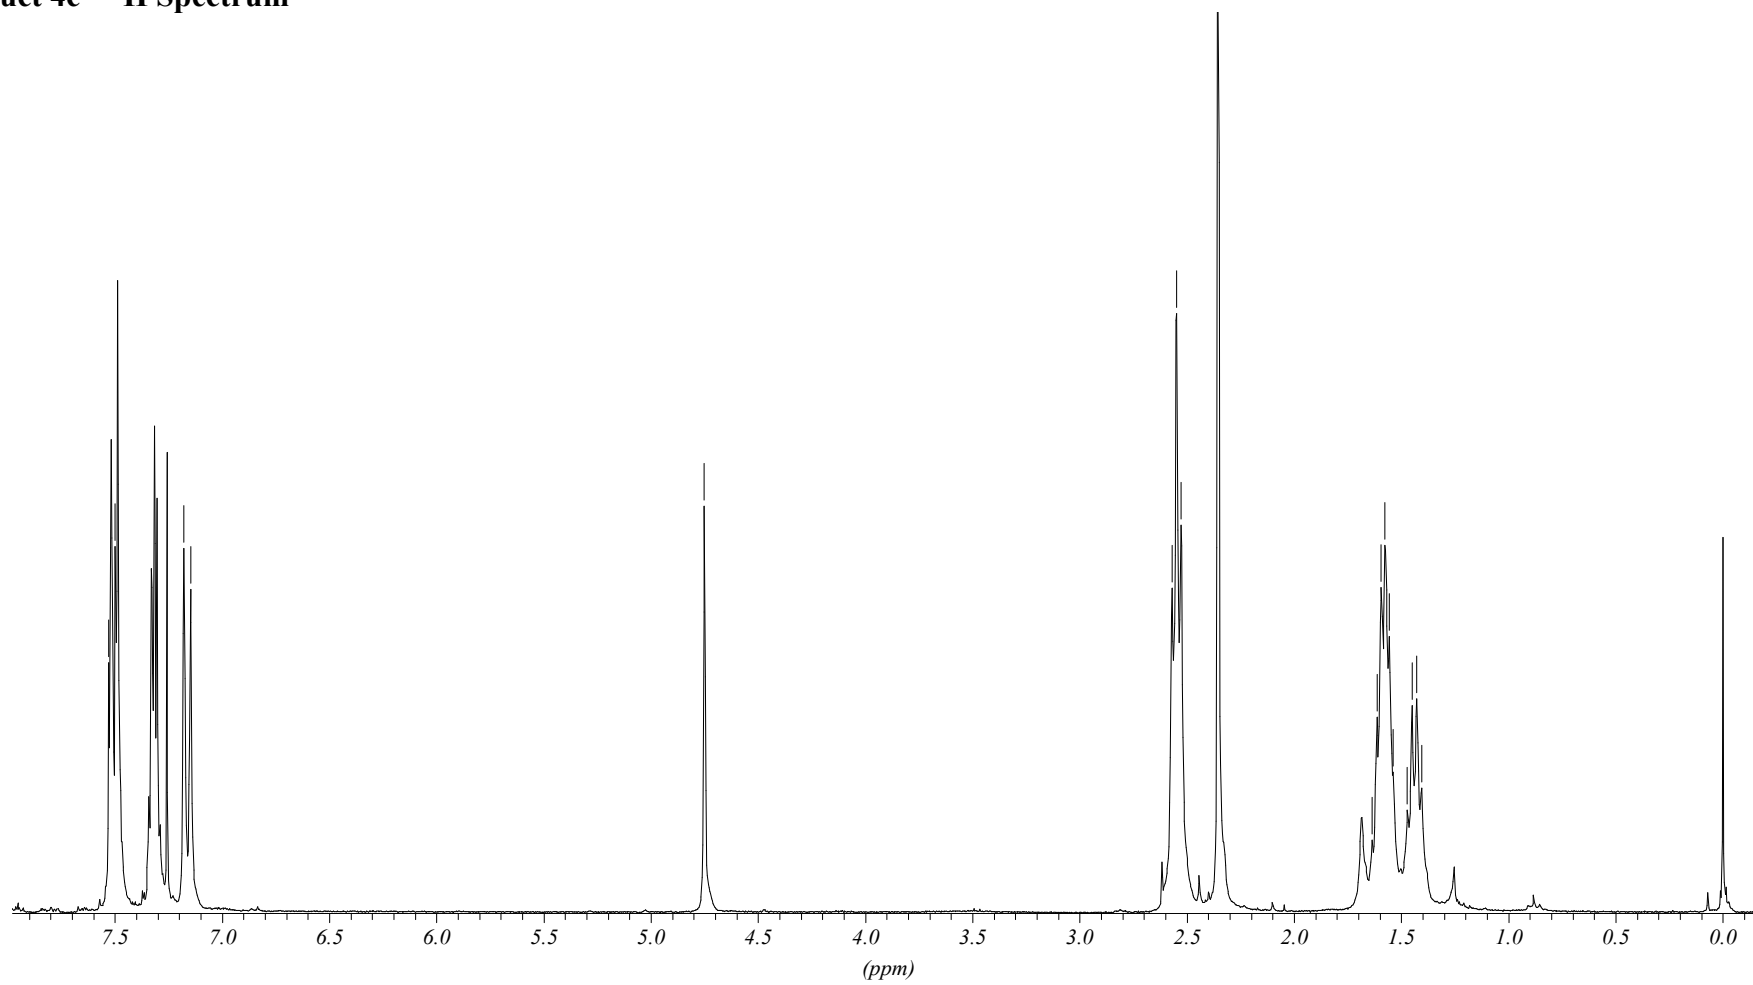

**Product 4c – <sup>13</sup>C Spectrum**

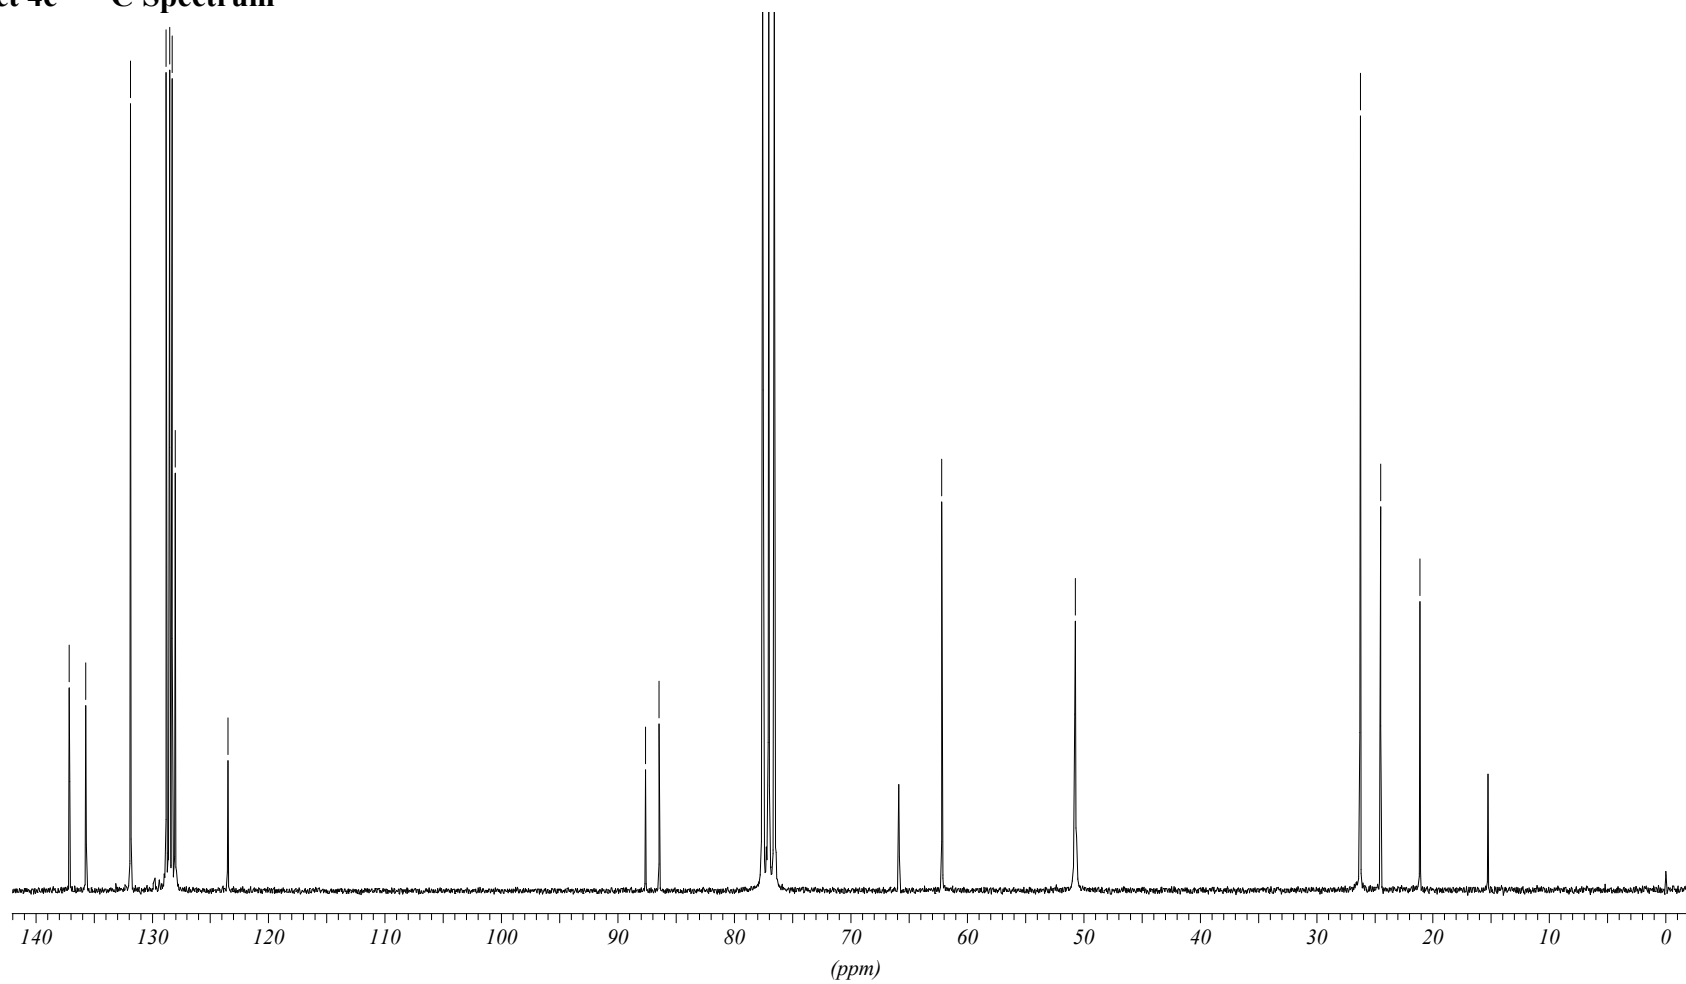

**Product 4c – IR Spectrum**

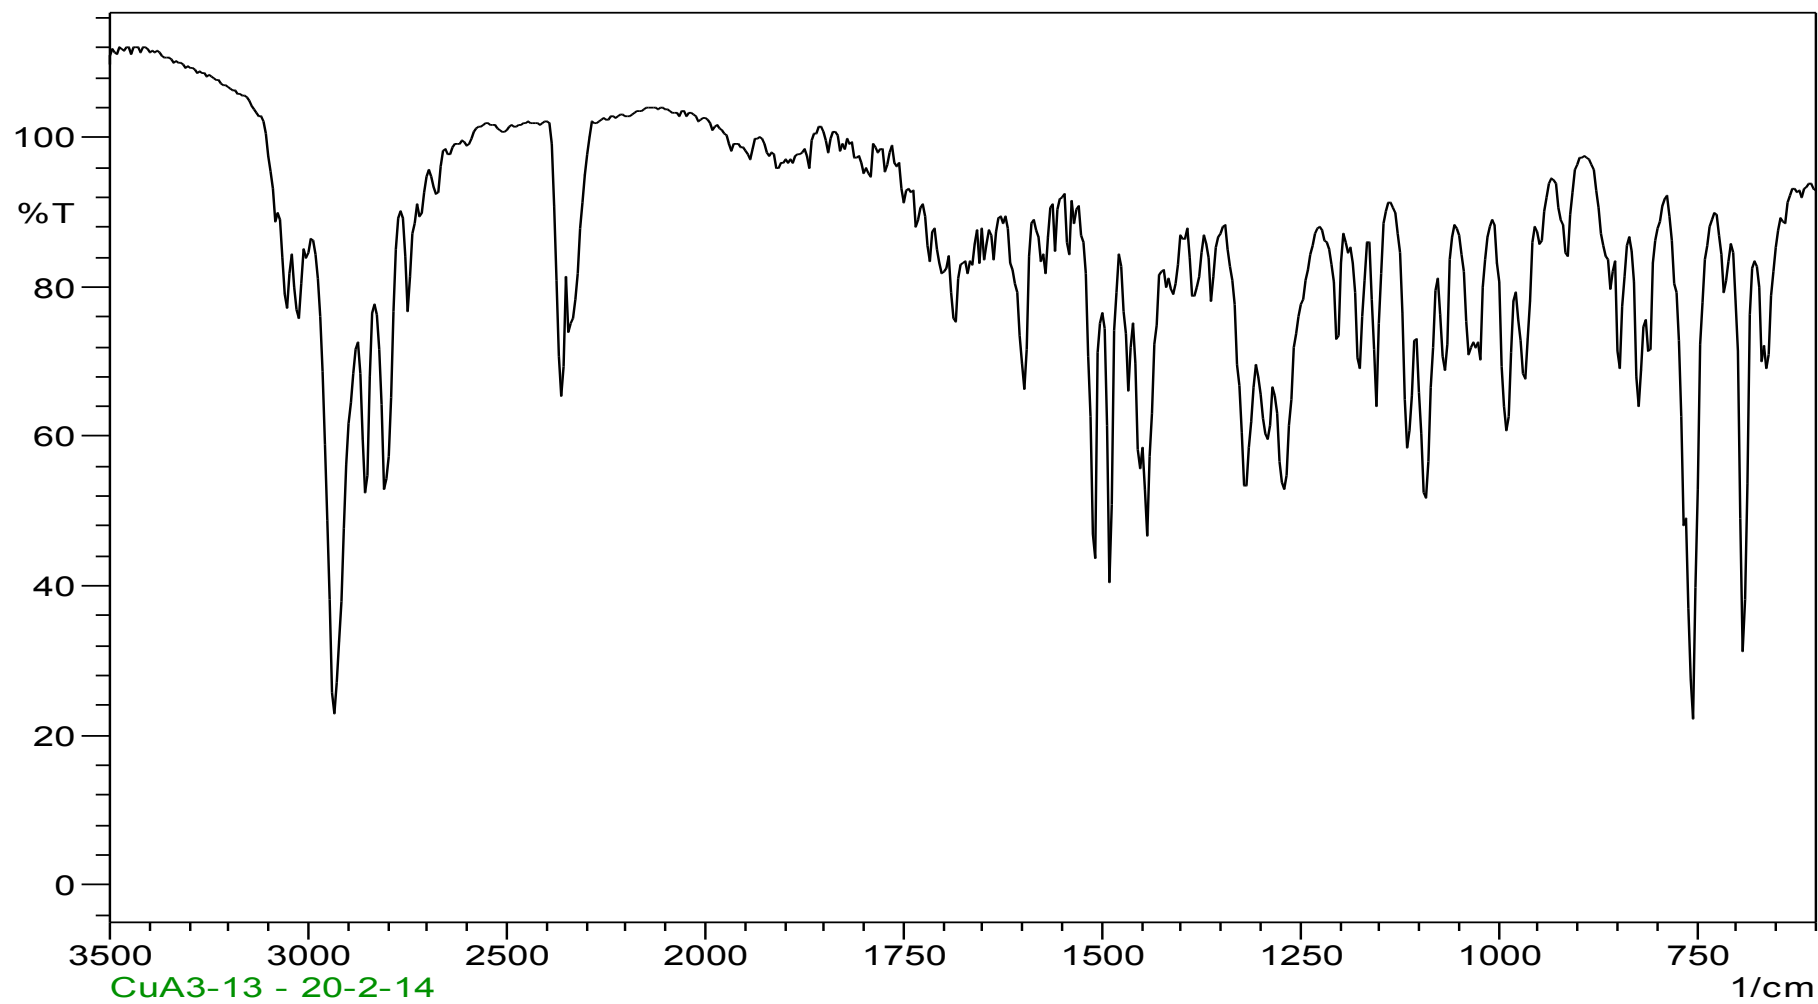

**Product 4d – <sup>1</sup>H Spectrum**

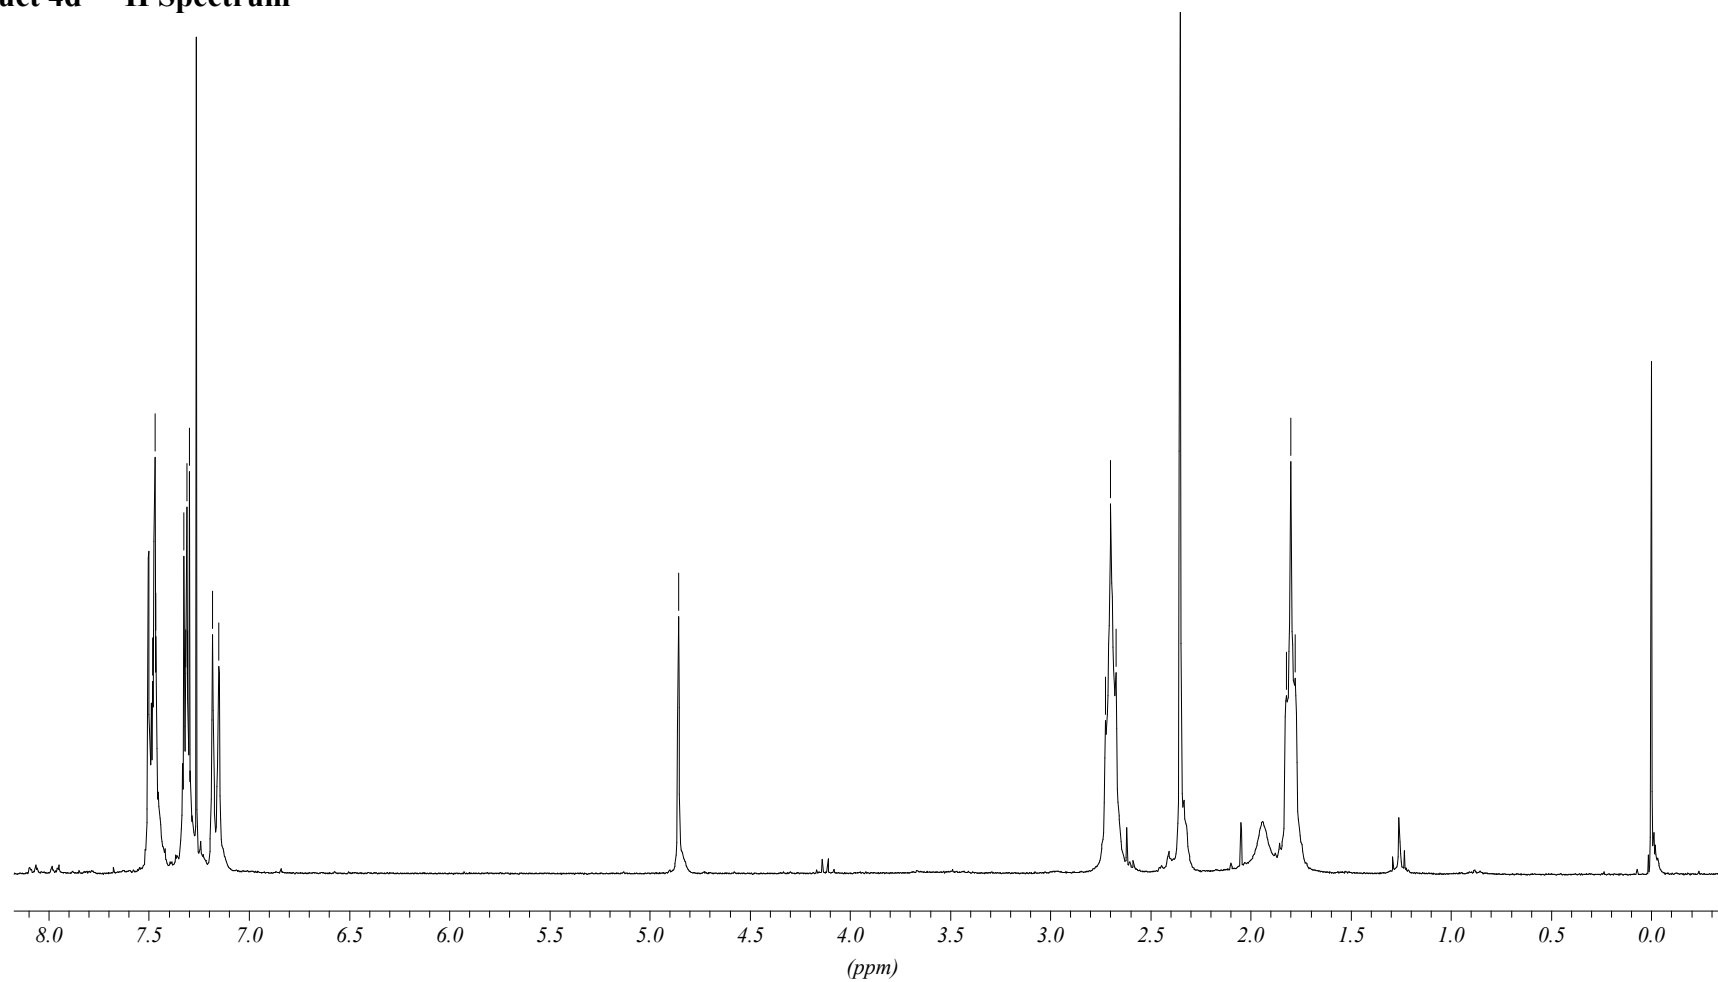

**Product 4d – <sup>13</sup>C Spectrum**

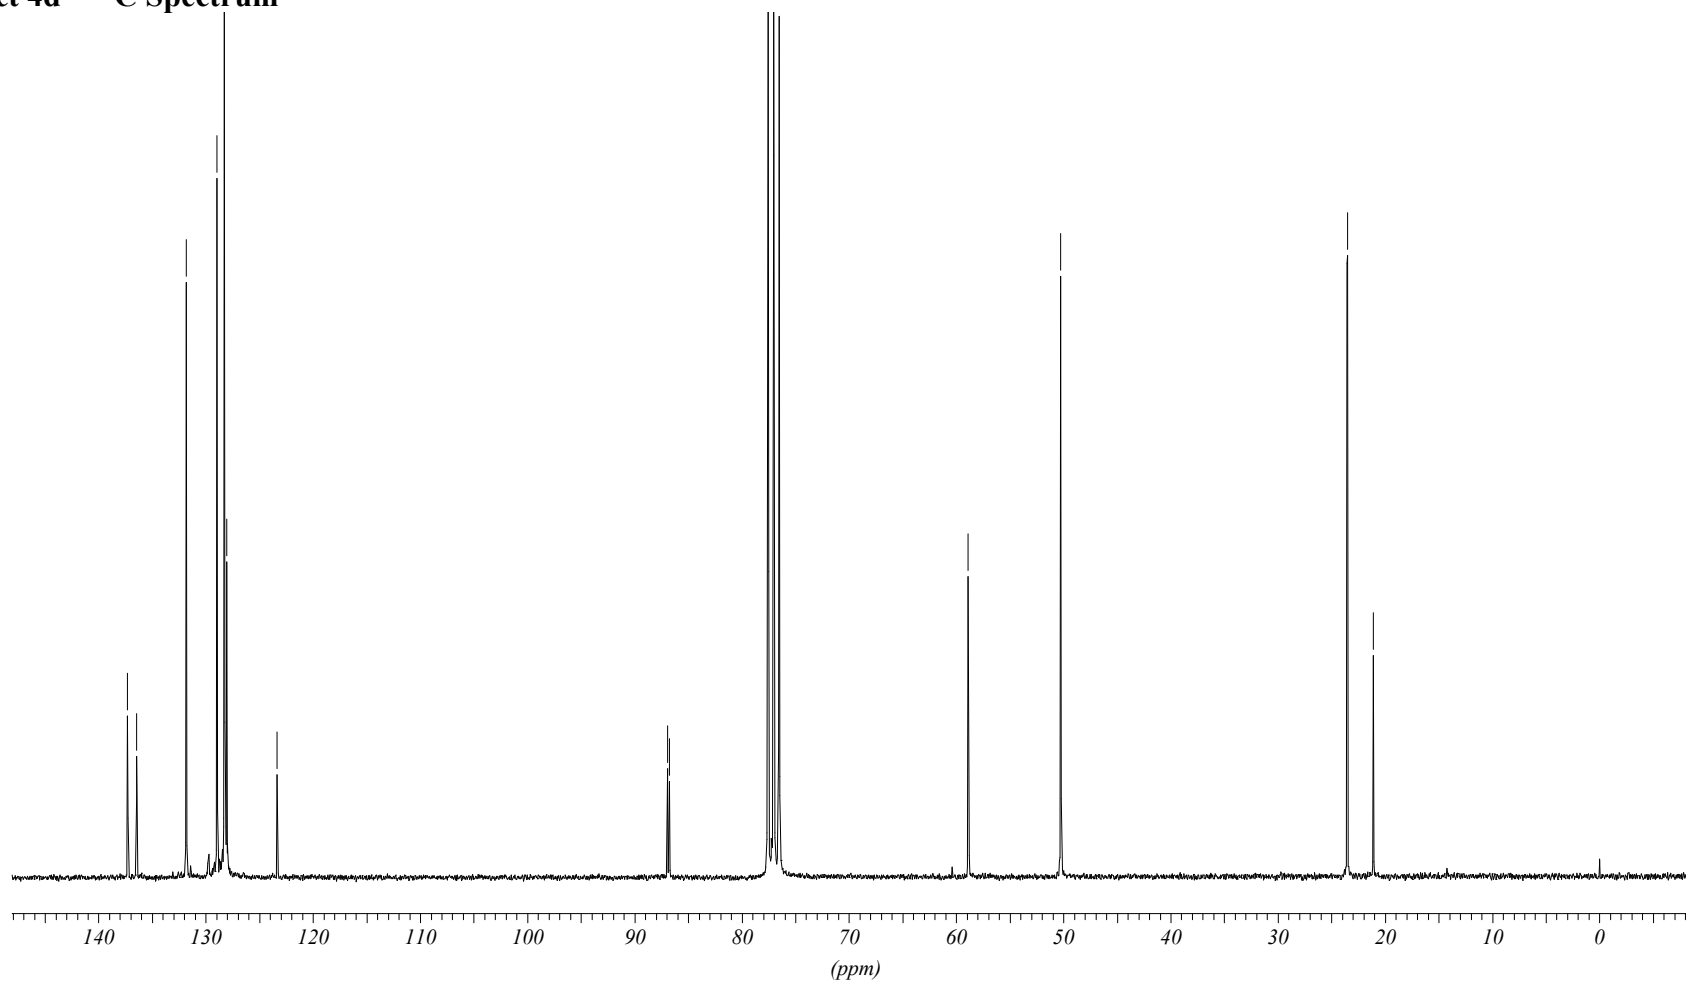

**Product 4d – IR Spectrum**

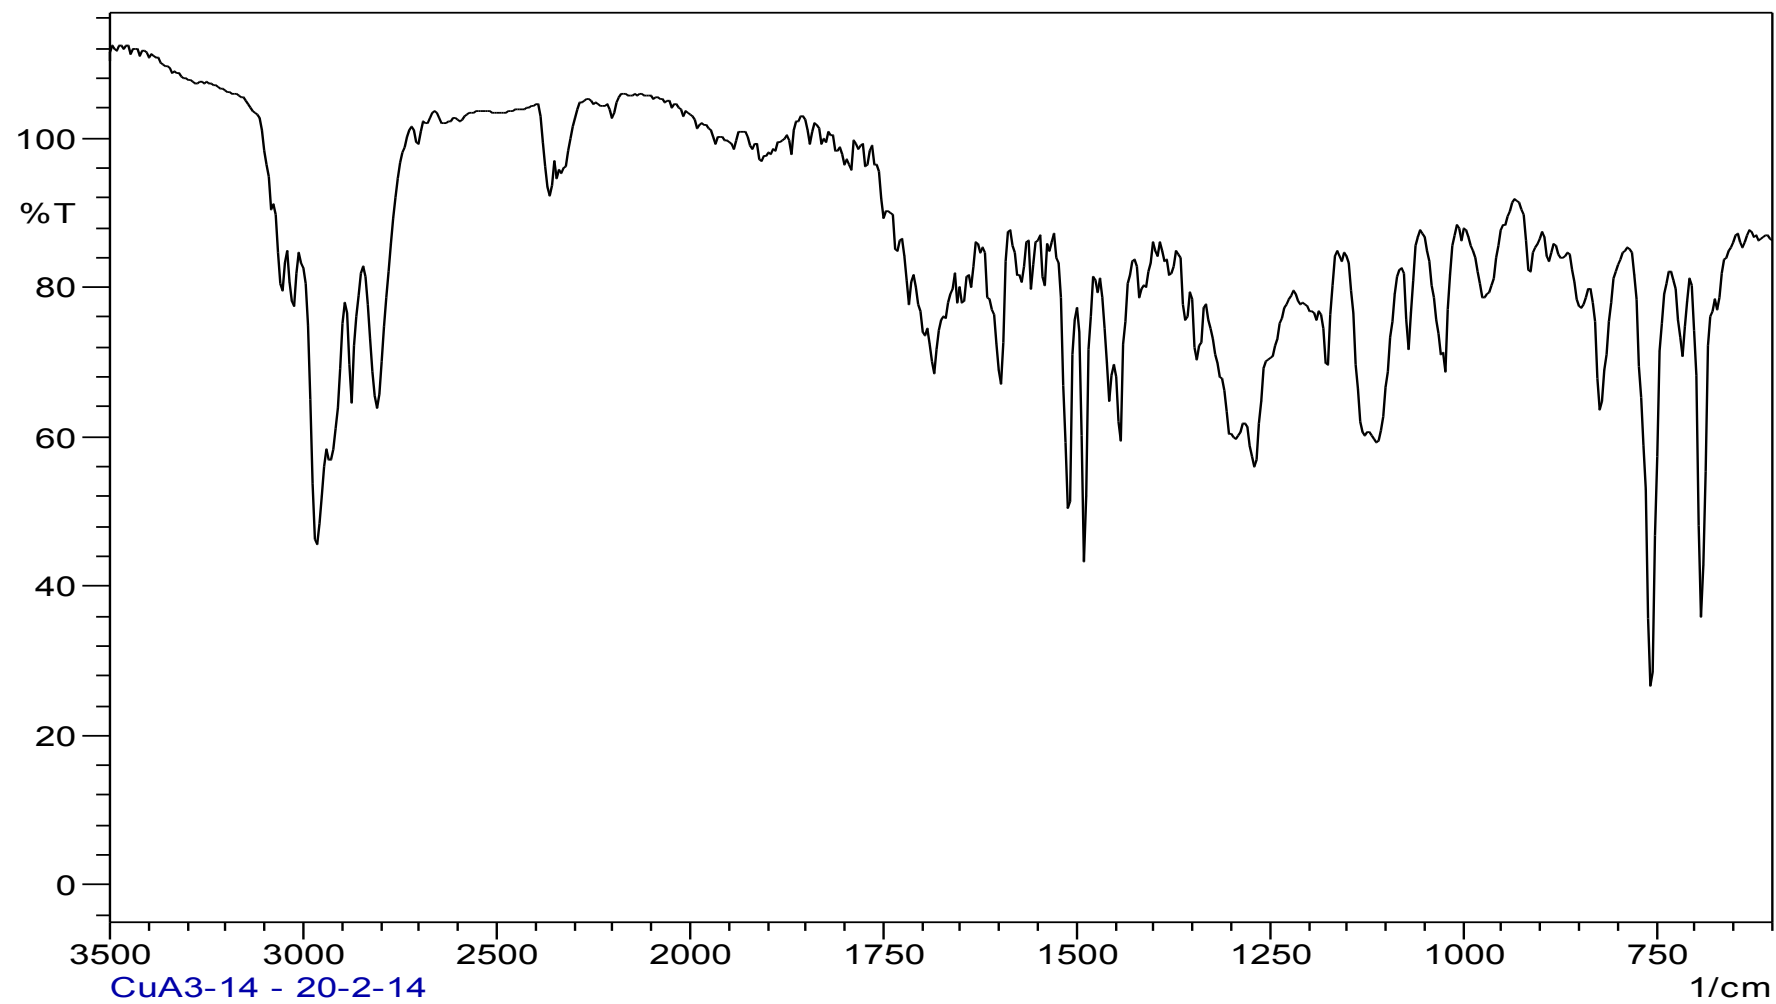

**Product 4e – <sup>1</sup>H Spectrum**

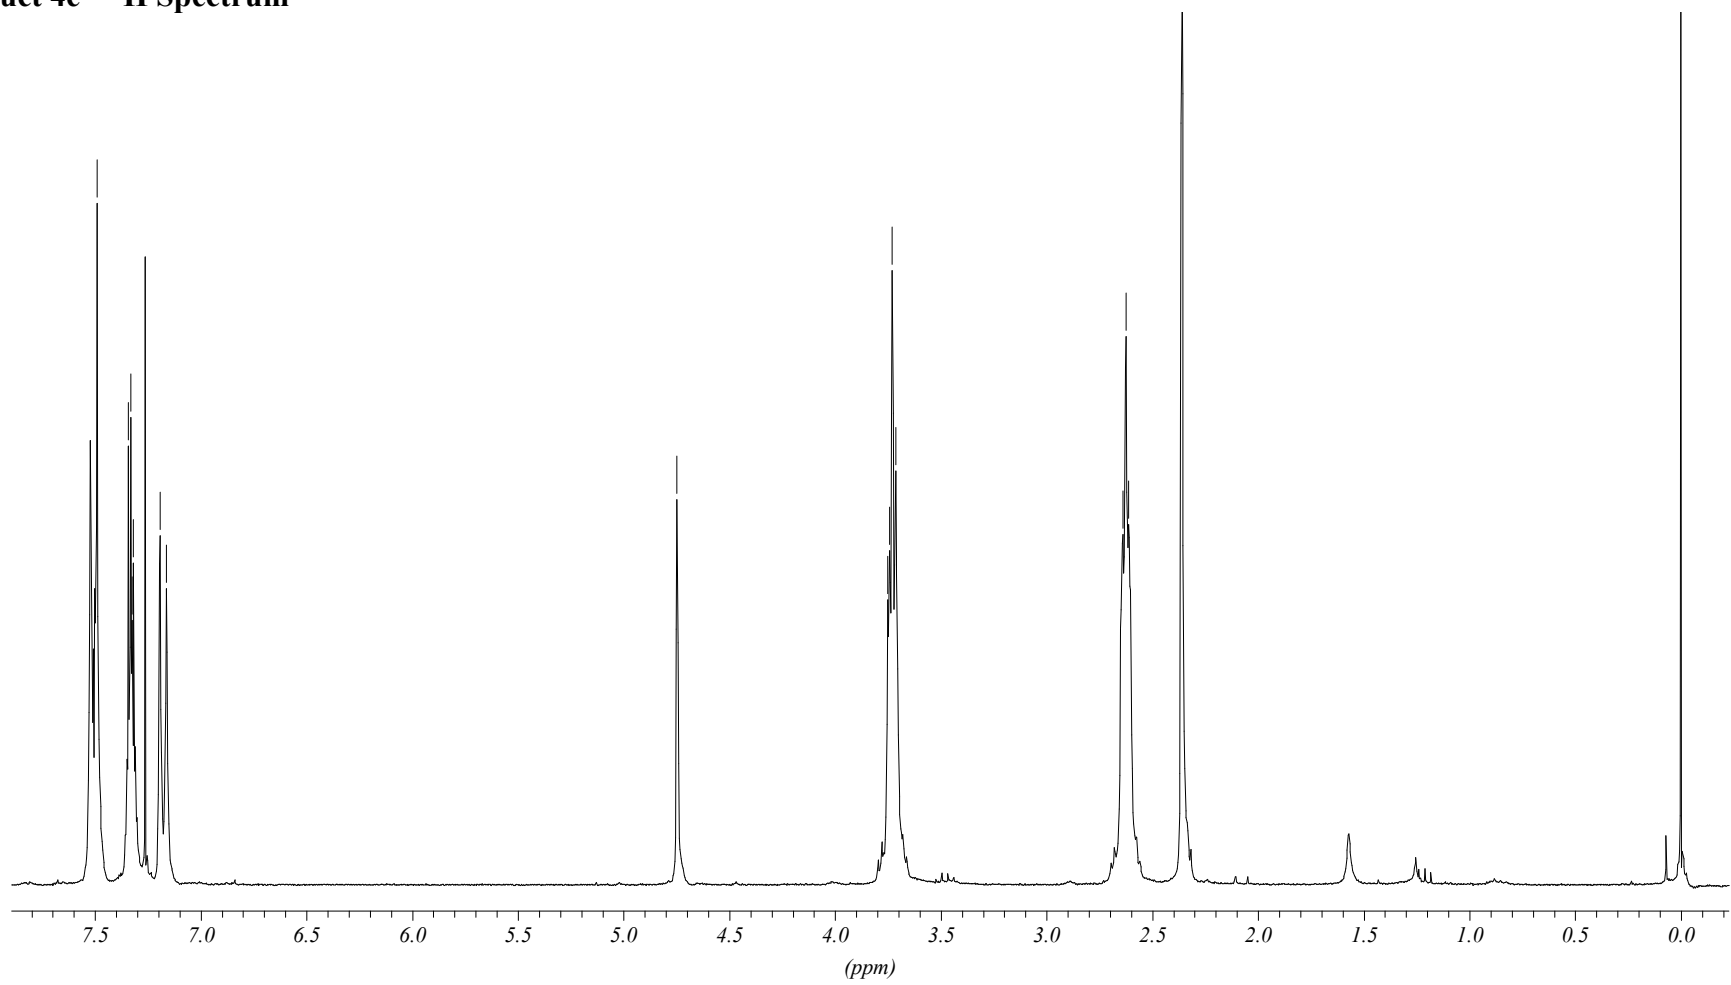

#

**Product 4e – <sup>13</sup>C Spectrum**

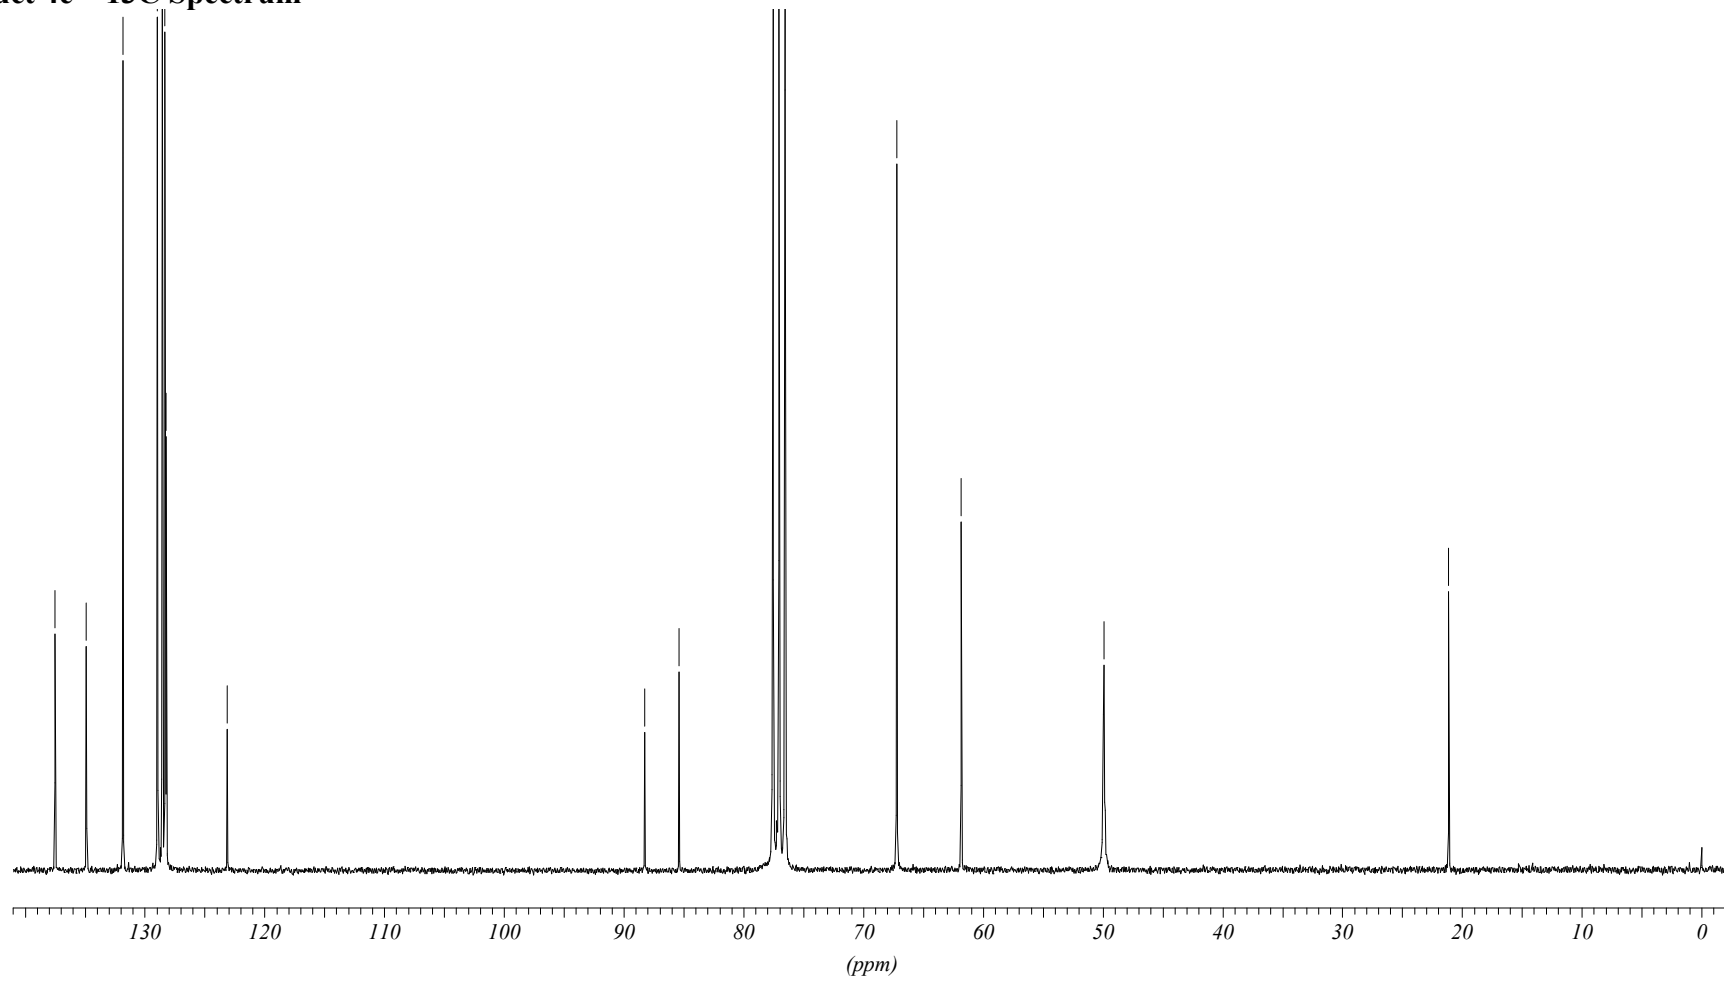



**Product 4e – IR Spectrum**

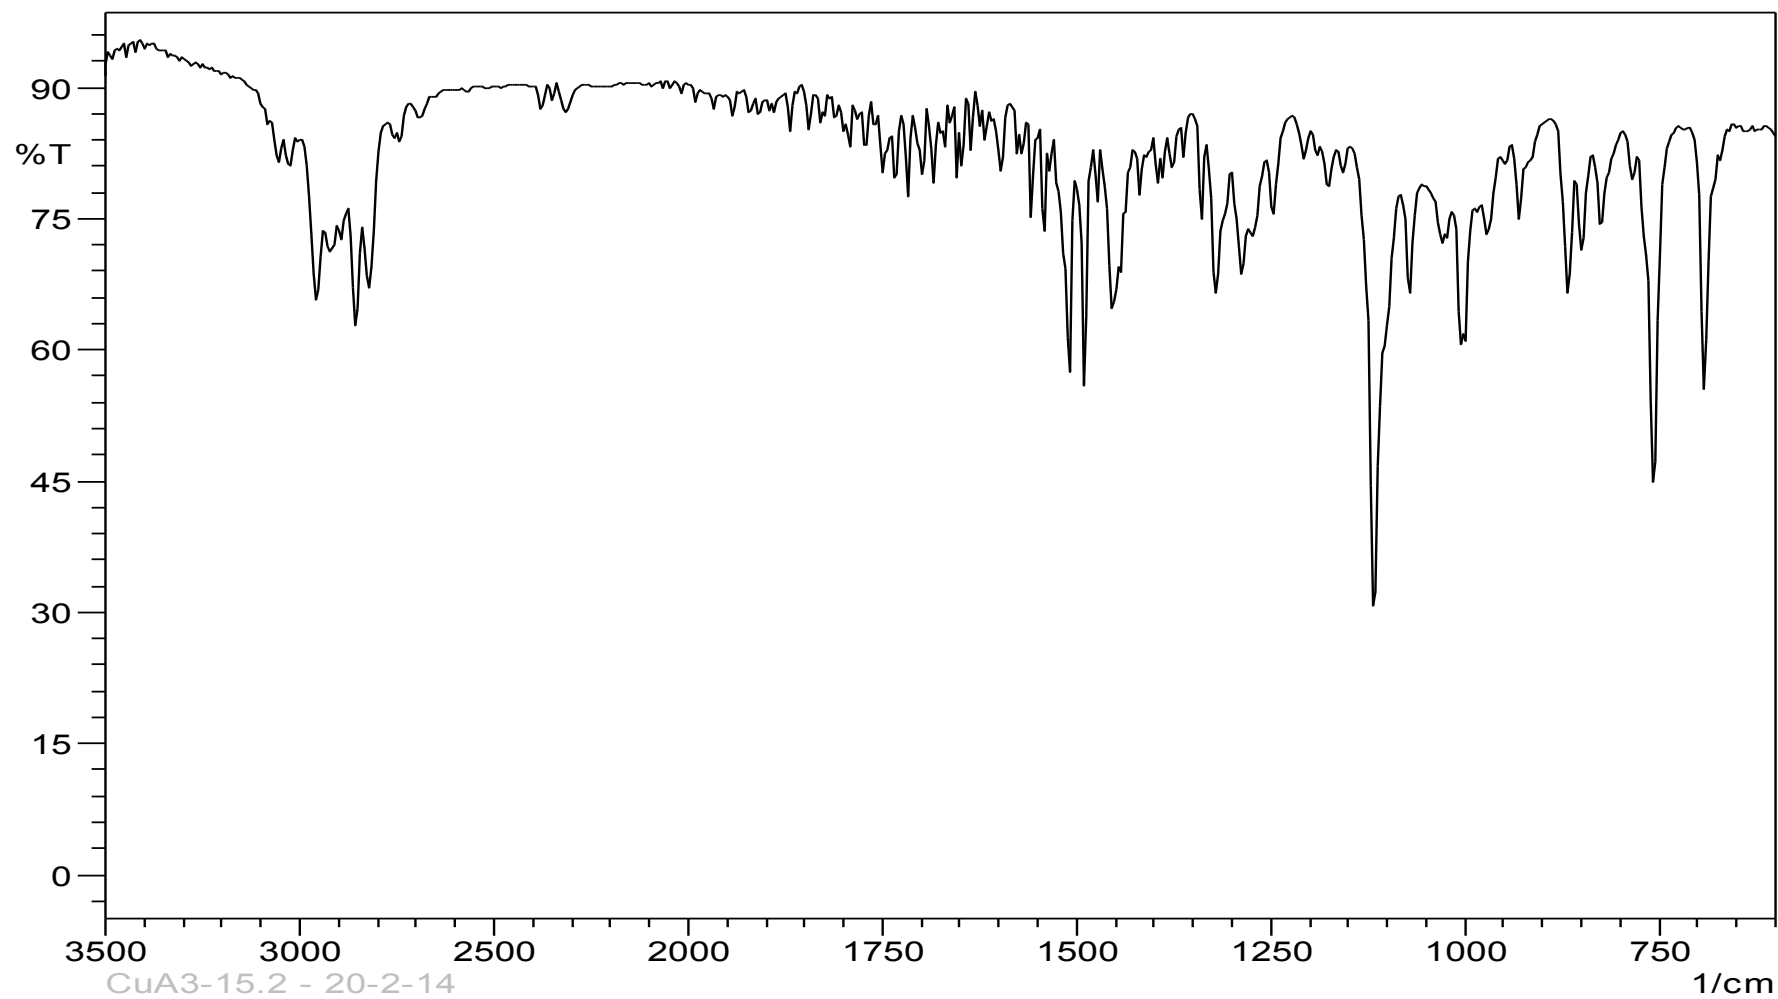

**Product 4f – <sup>1</sup>H Spectrum**

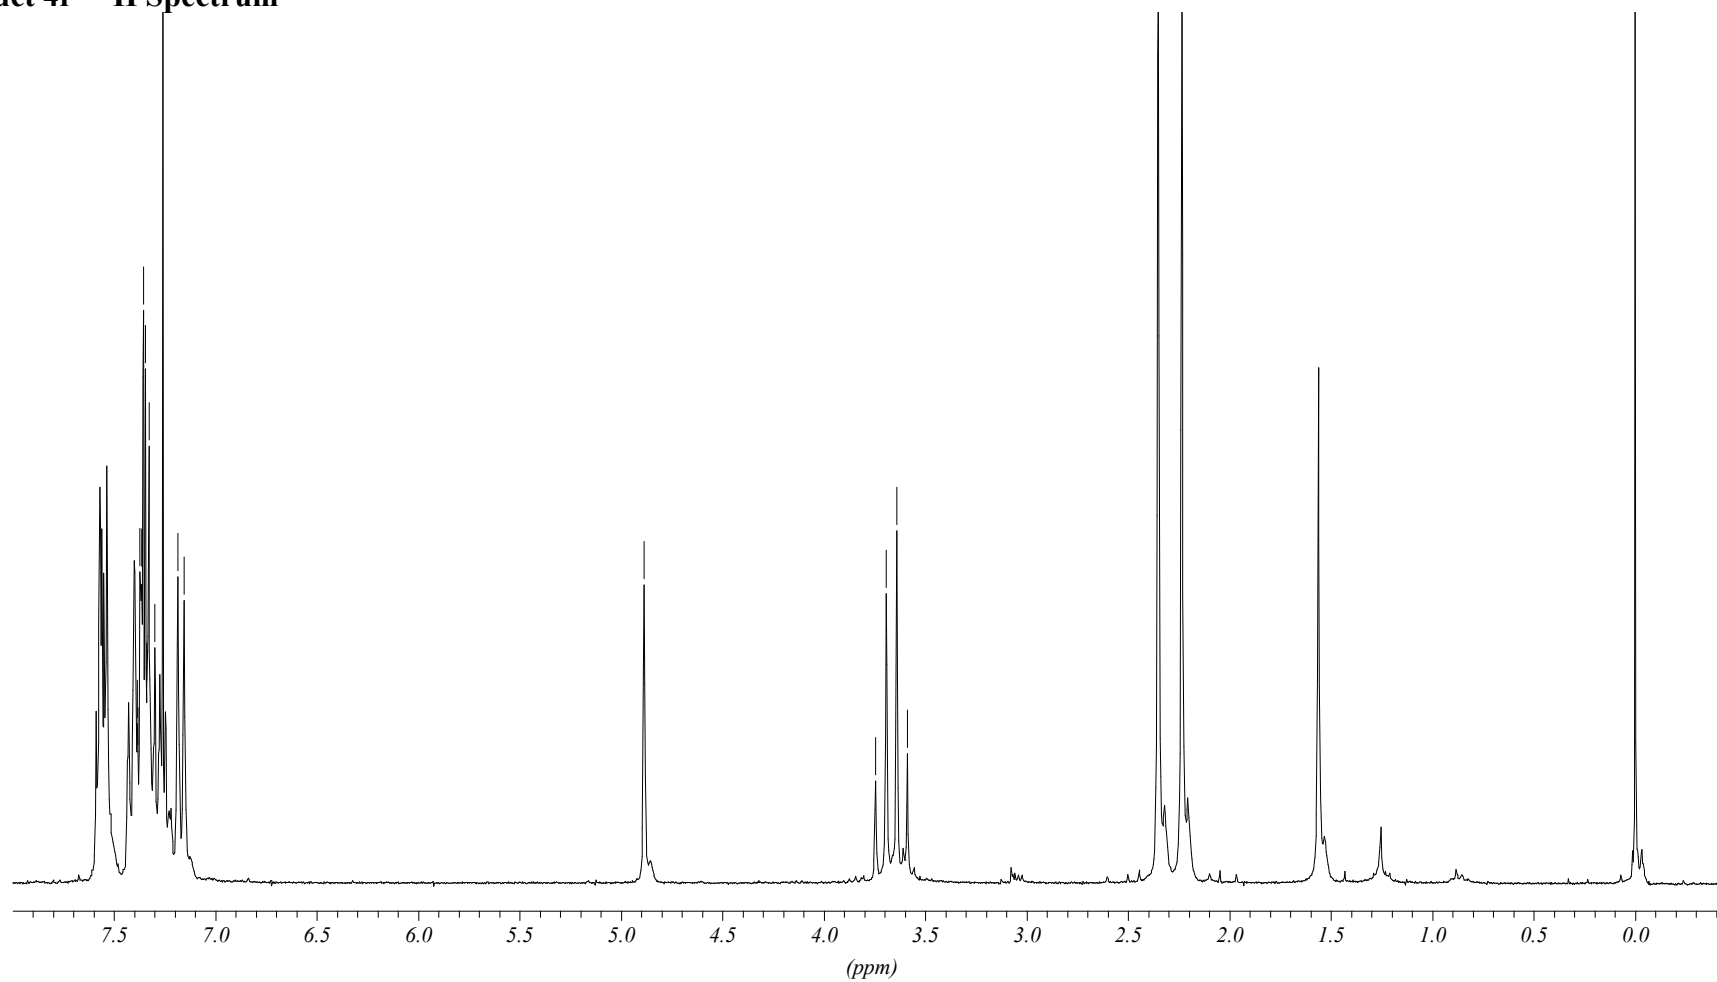

**Product 4f – <sup>13</sup>C Spectrum**

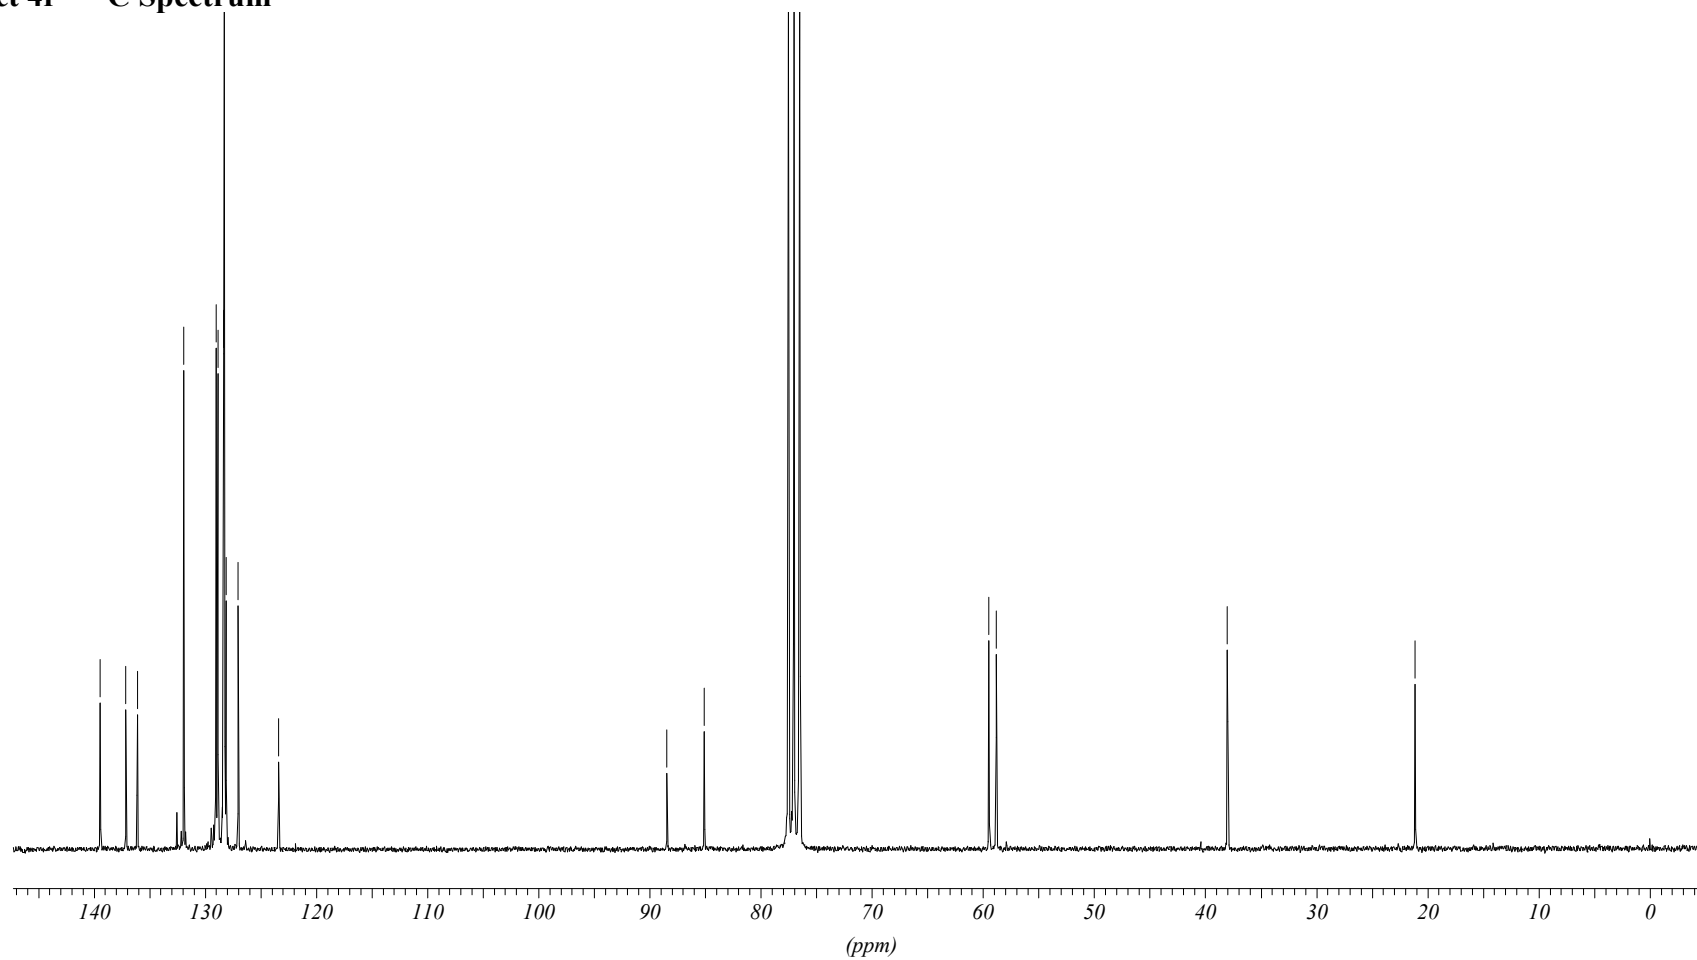

# Product 4f – IR Spectrum

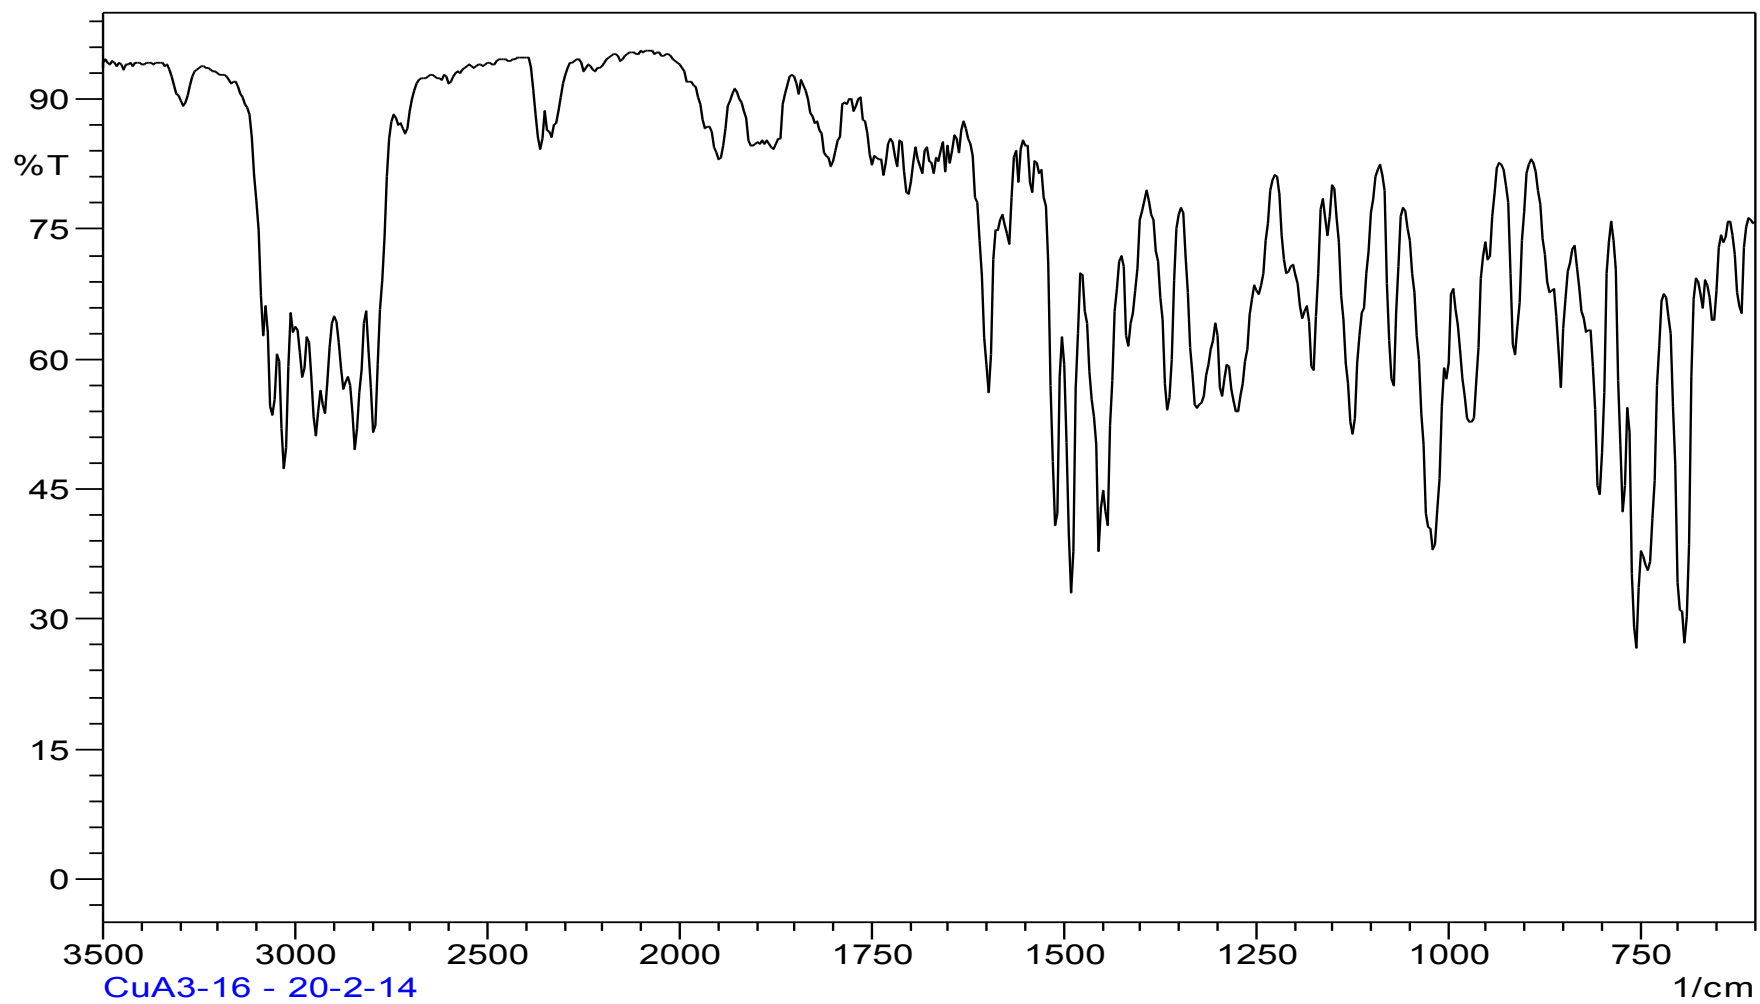

# Product 4f – GC-MS Spectrum

RT: 0.00 - 28.84

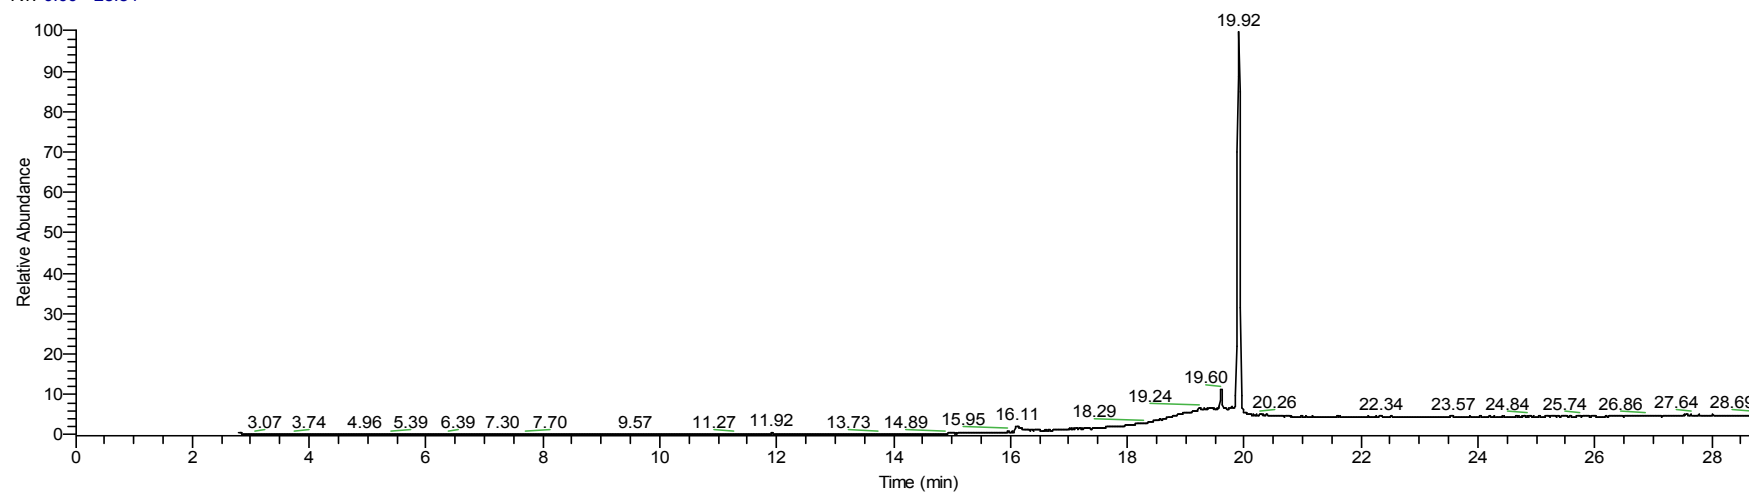

NL:  
5.43E7  
TIC F: MS  
CuA3-16r1

CuA3-16r1 #1349 RT: 19.92 AV: 1 SB: 2 20.12, 21.00 NL: 1.64E7  
T: + c Full ms [ 30.00-400.00]

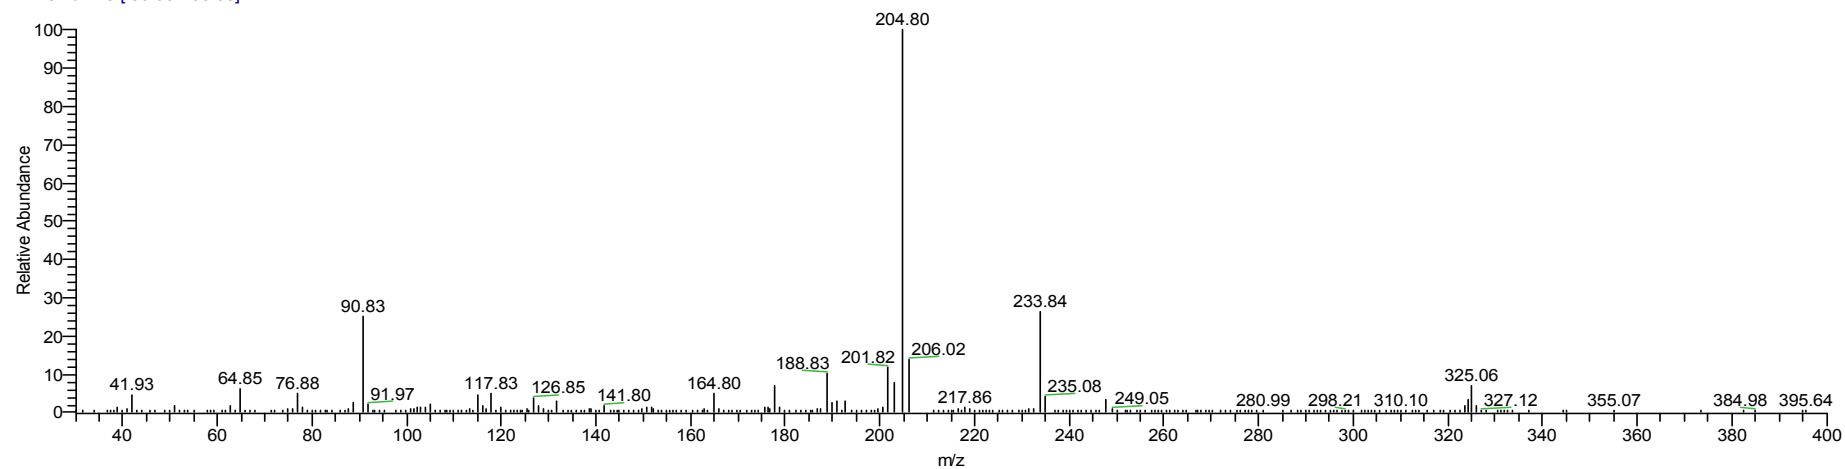

**Product 4h – <sup>1</sup>H Spectrum**

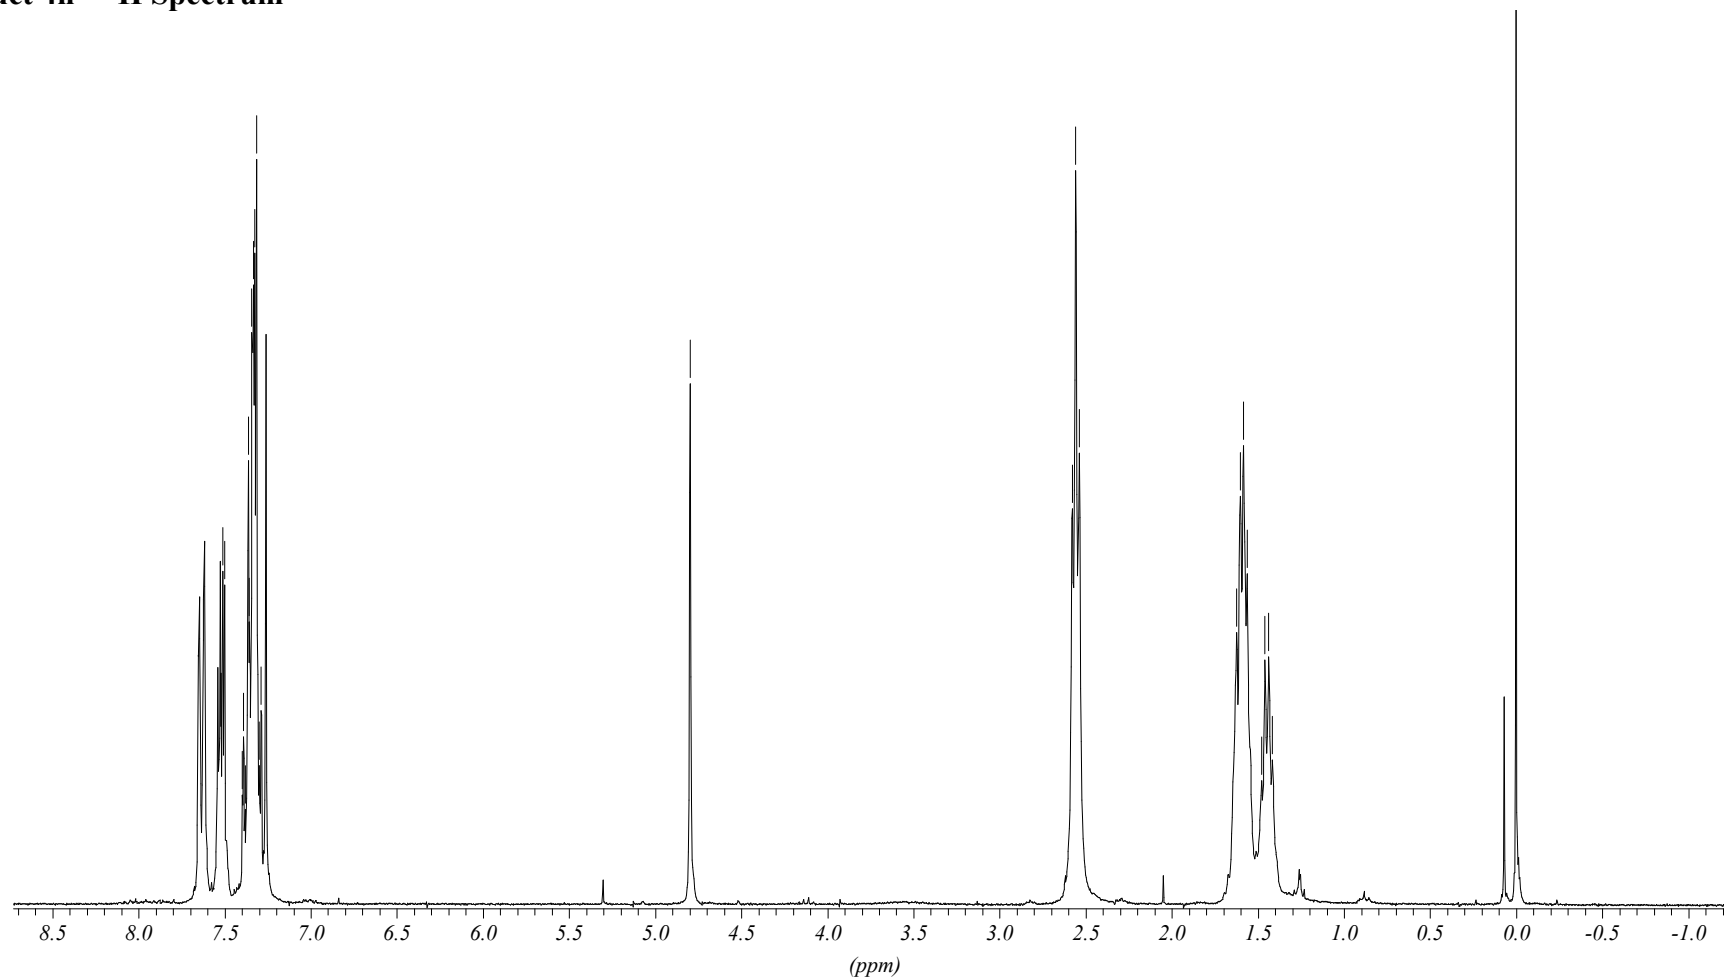

**Product 4h –  $^{13}\text{C}$  Spectrum**

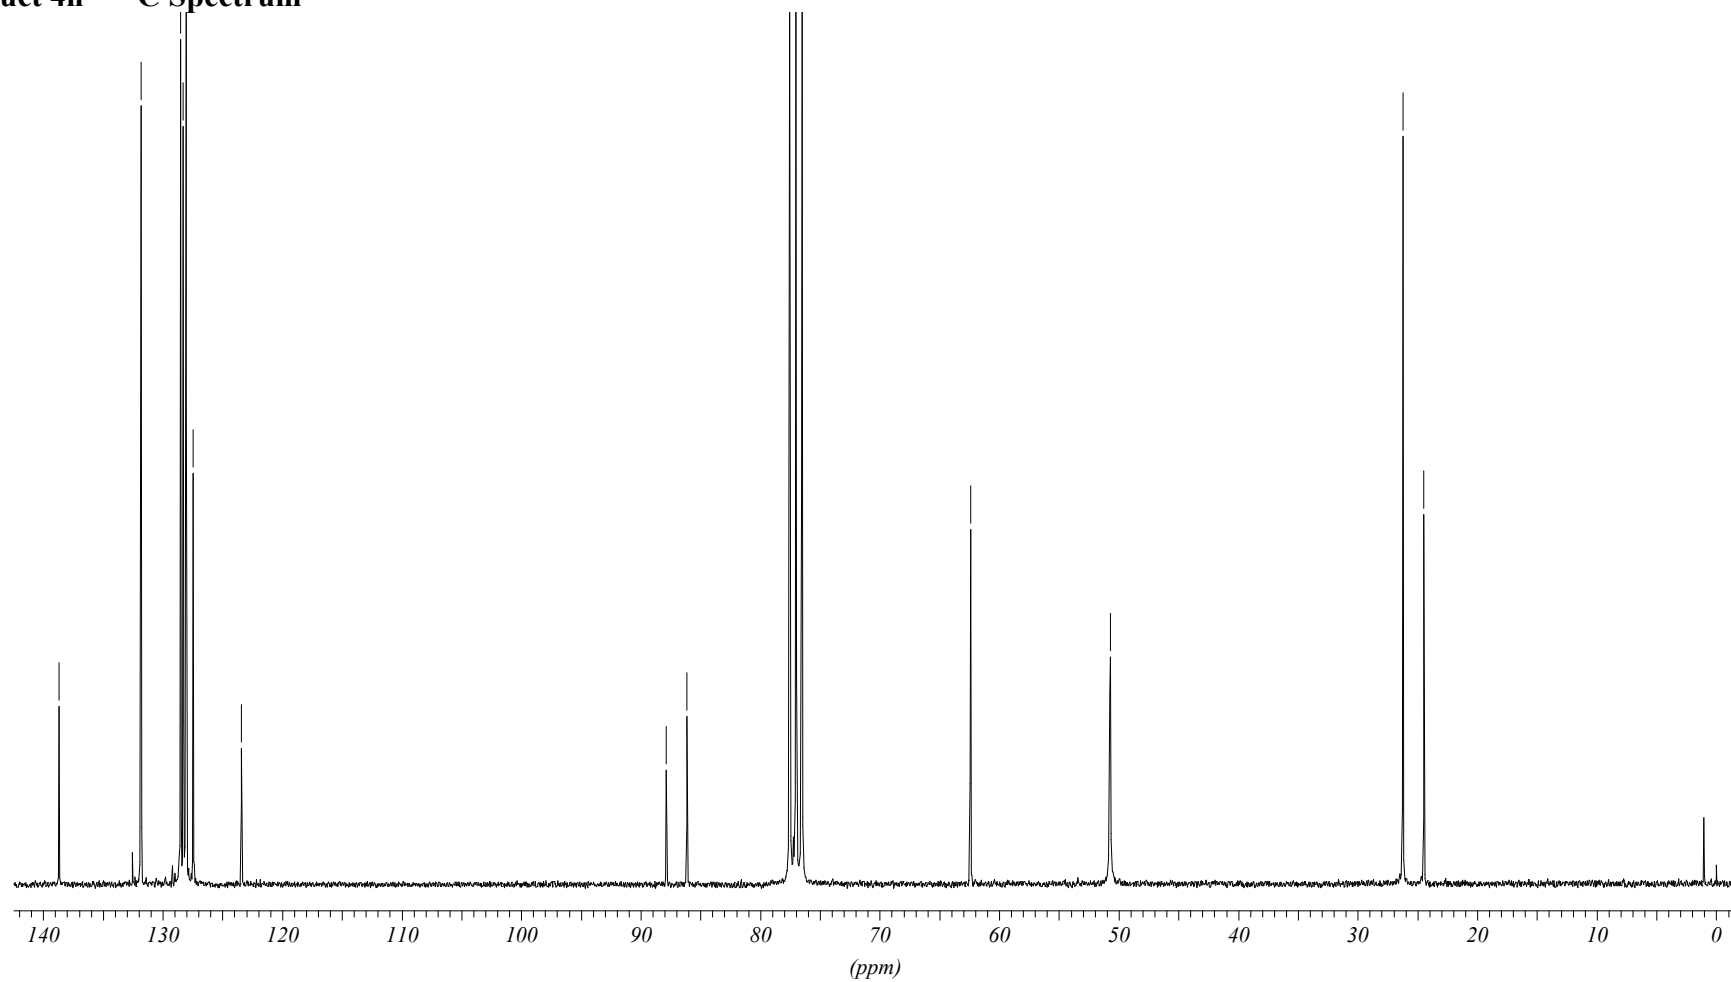

# Product 4h – IR Spectrum

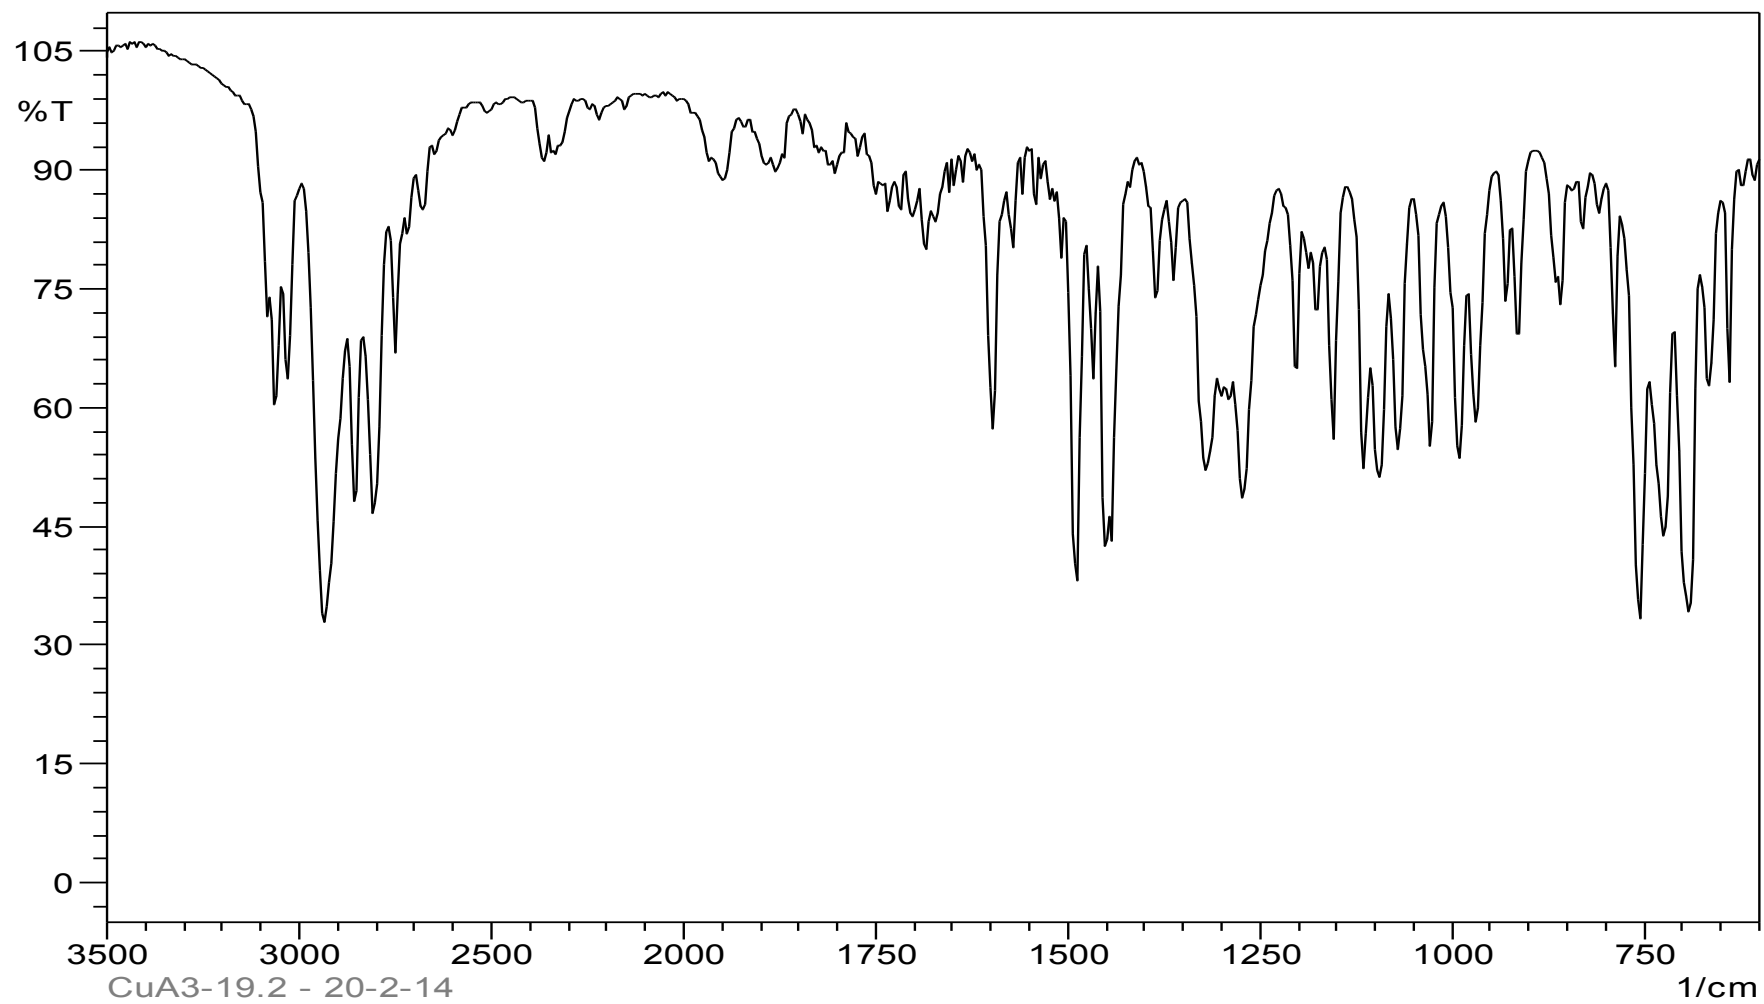



**Product 4i – <sup>1</sup>H Spectrum**

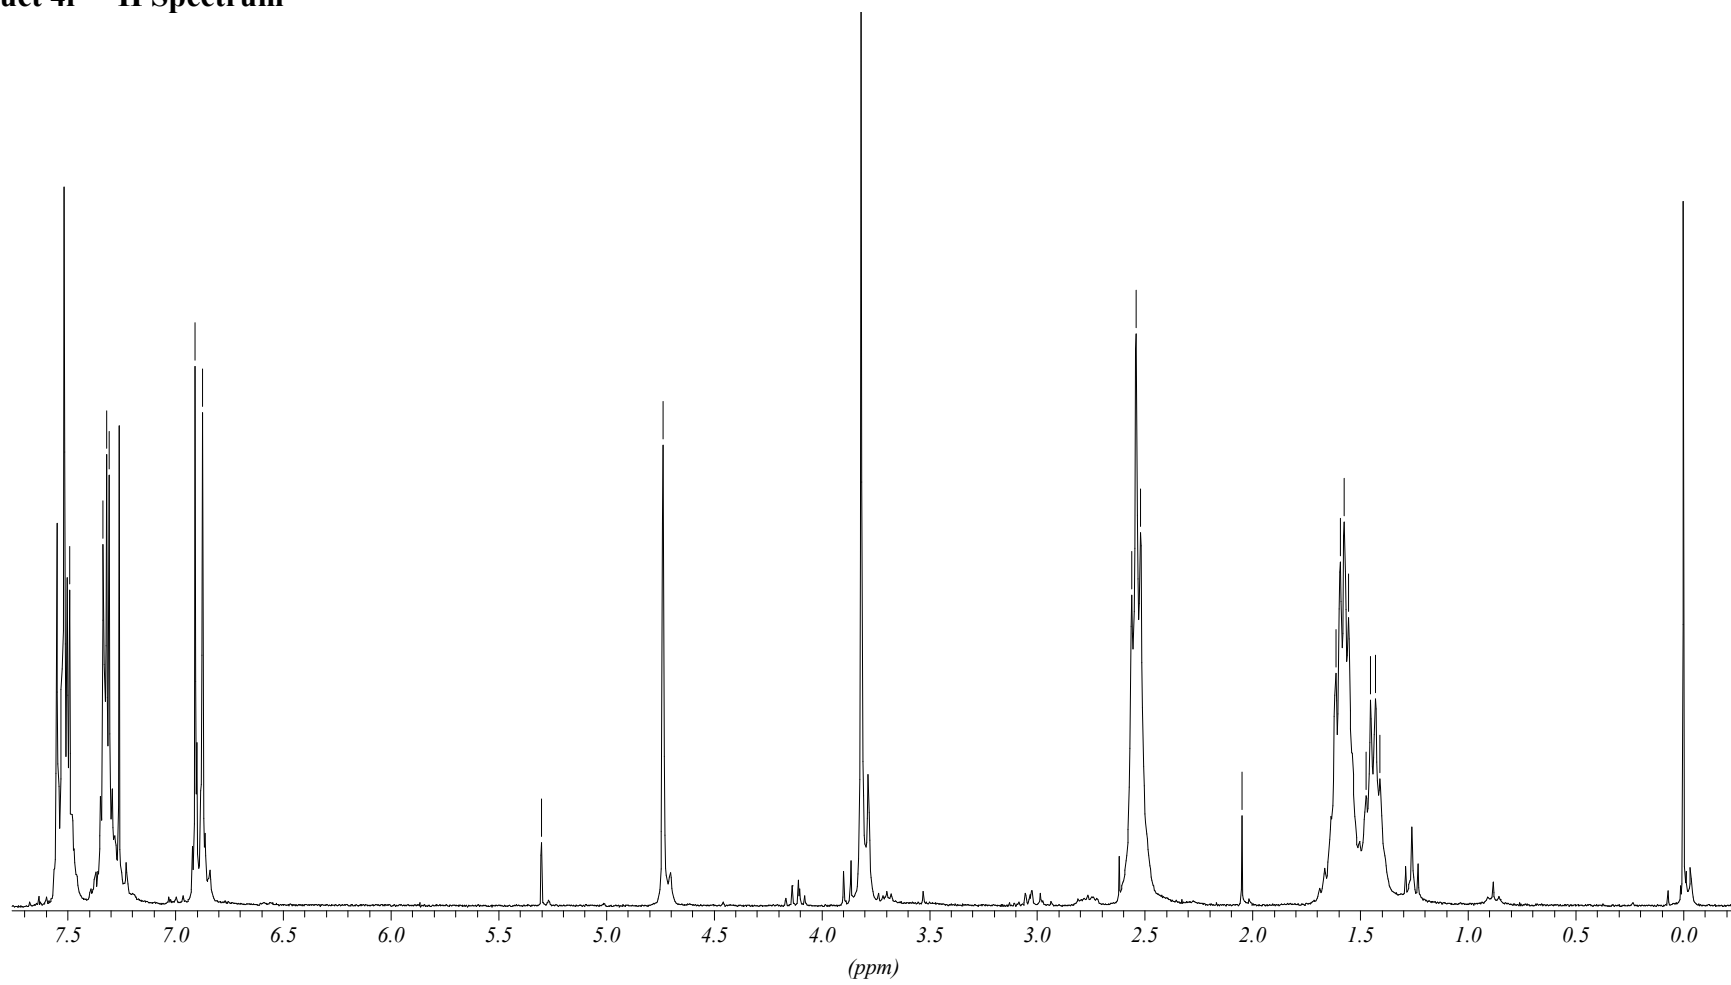

**Product 4i –  $^{13}\text{C}$  Spectrum**

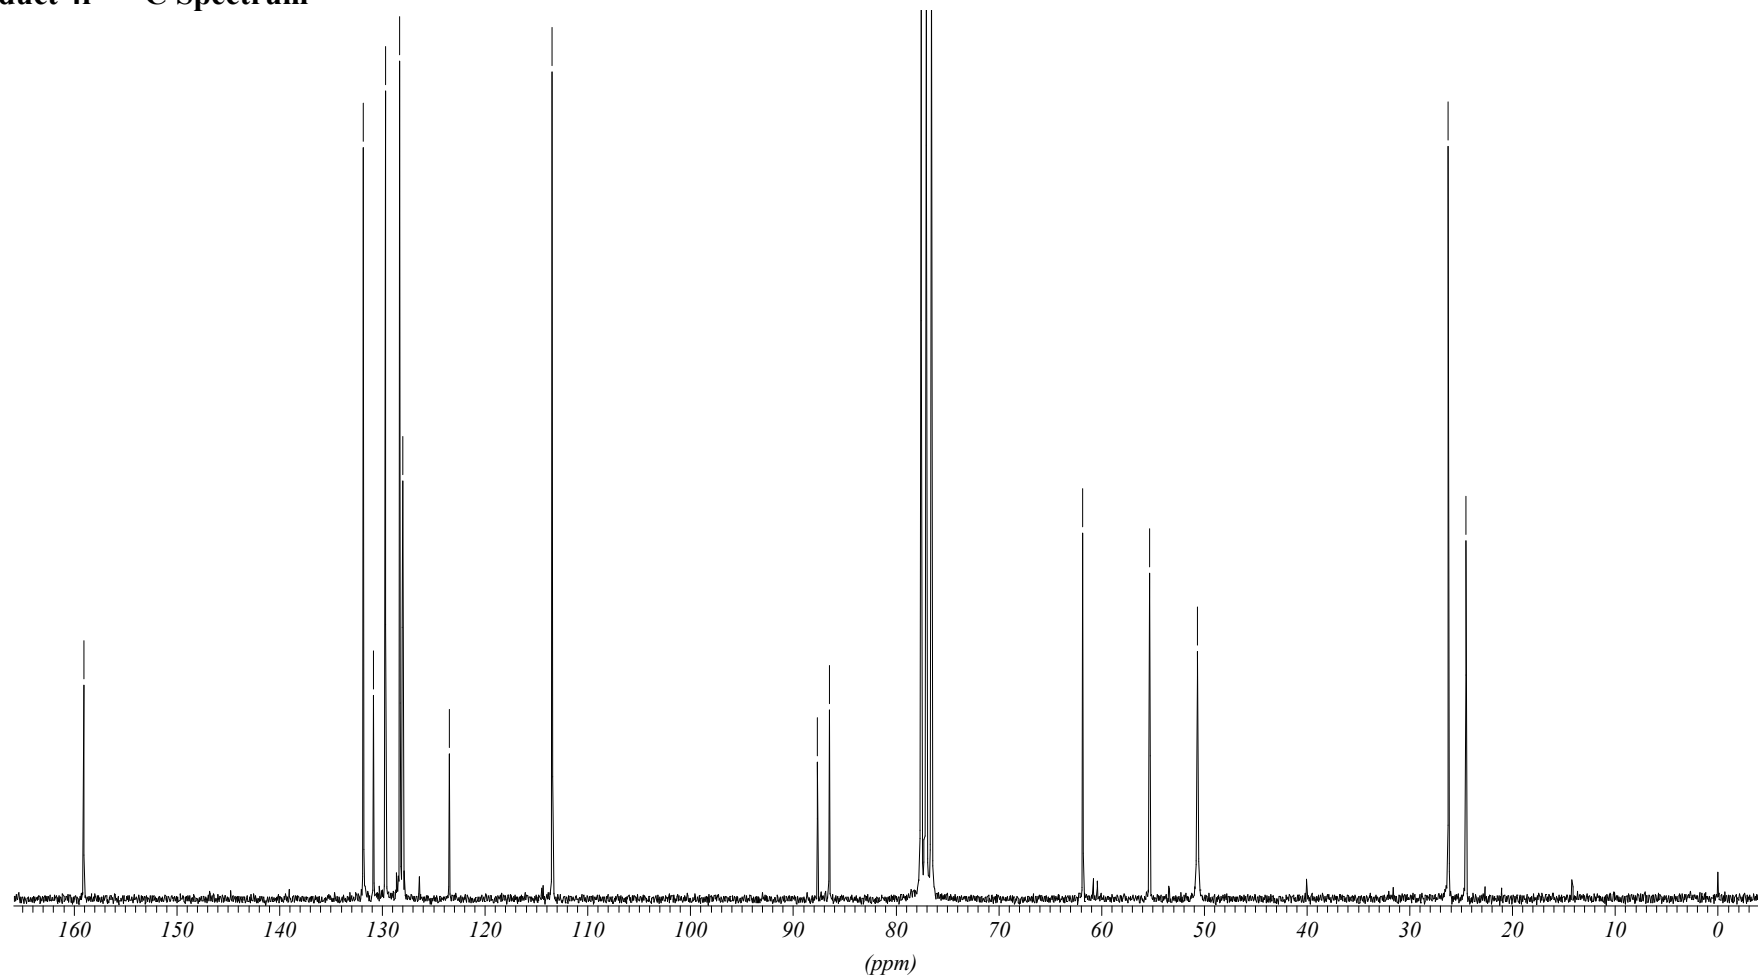

# Product 4i – IR Spectrum

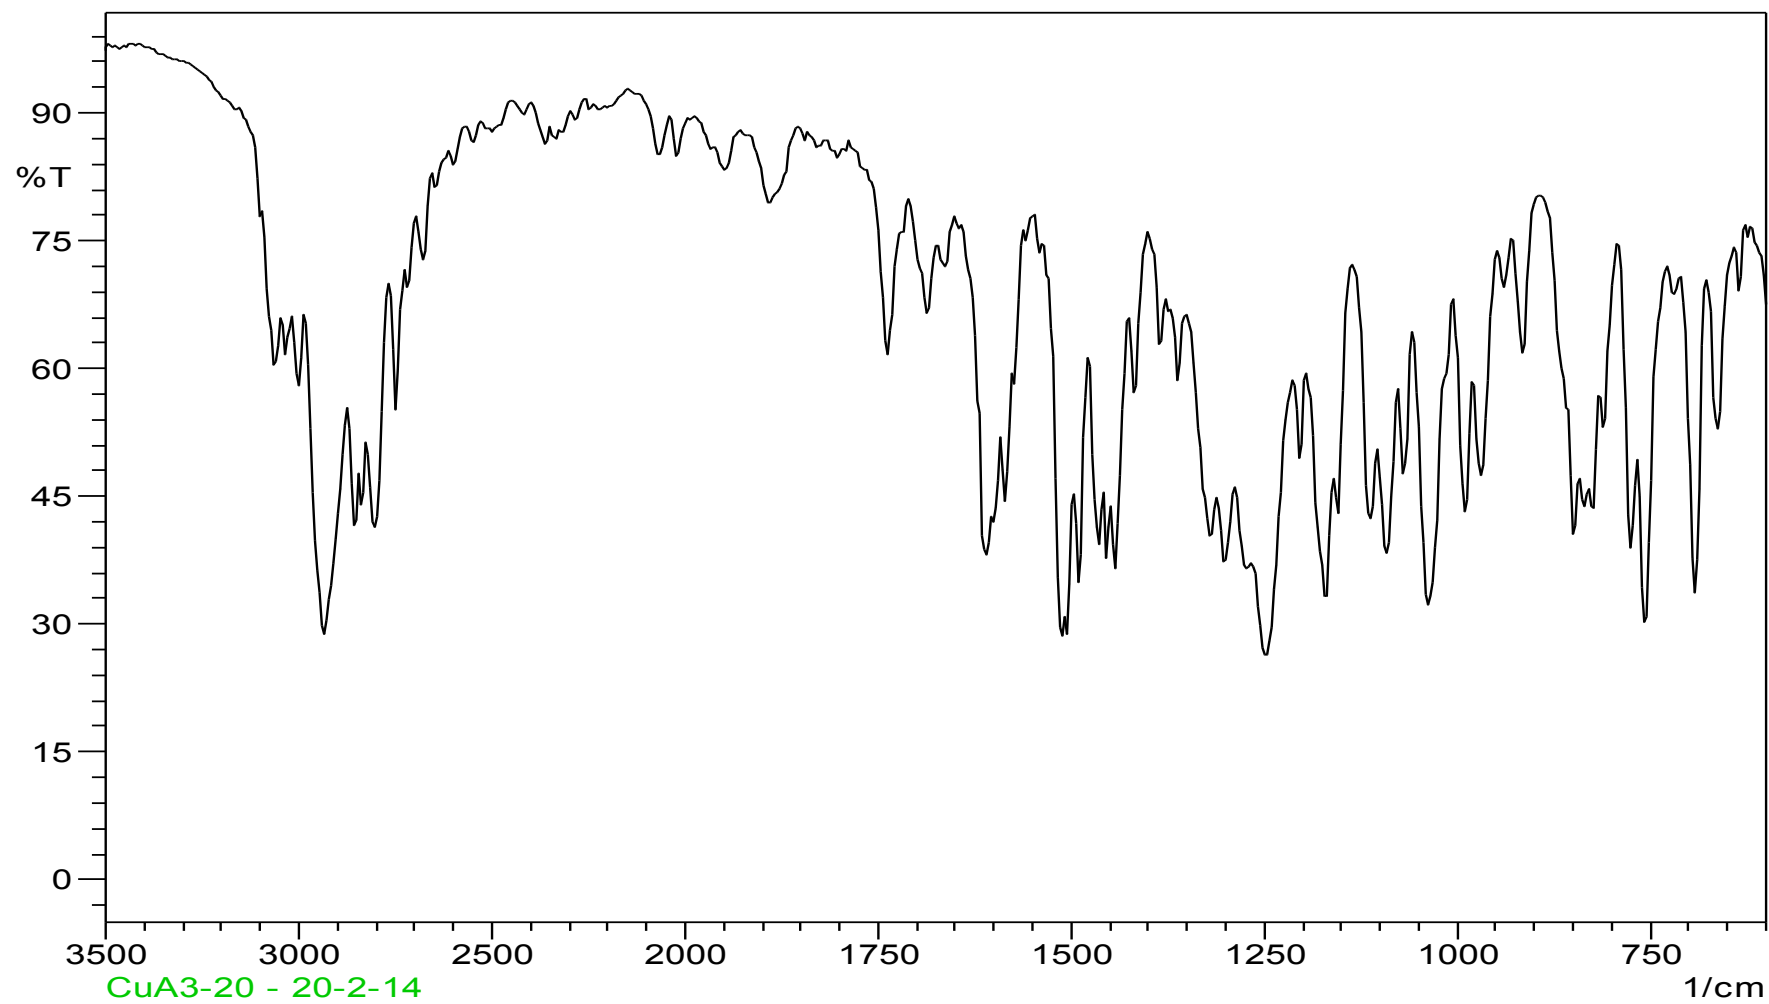

**Product 4k – <sup>1</sup>H Spectrum**

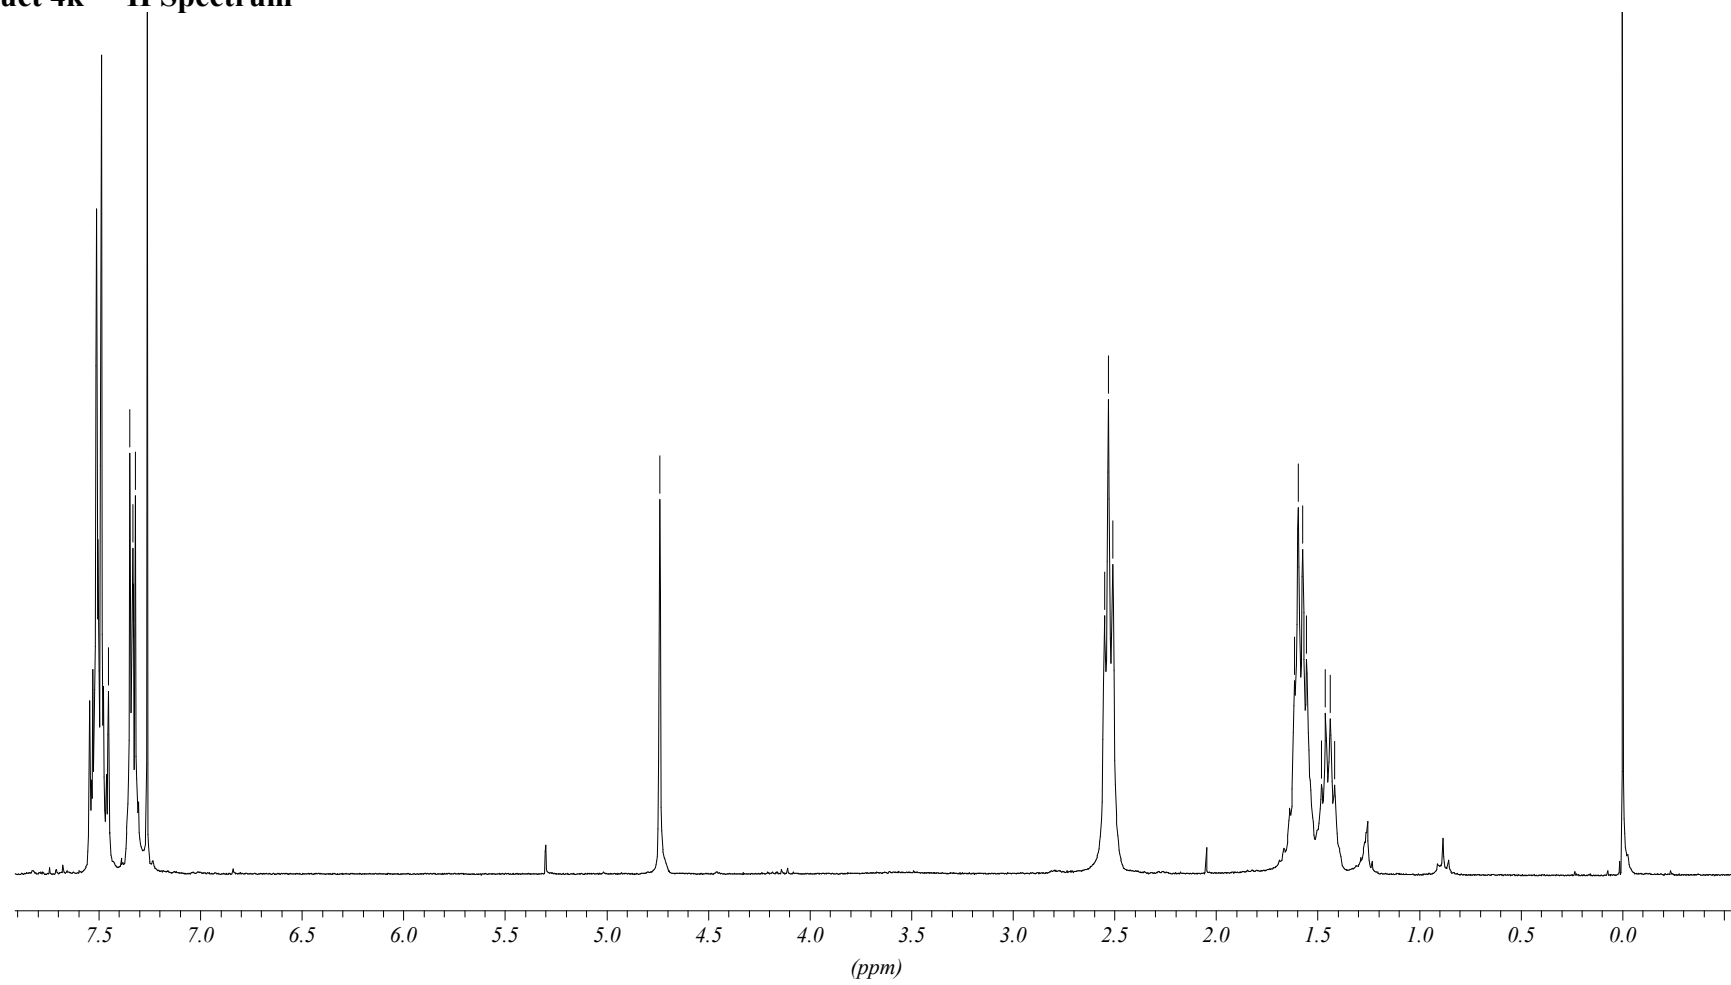

**Product 4k – <sup>1</sup>H Spectrum**

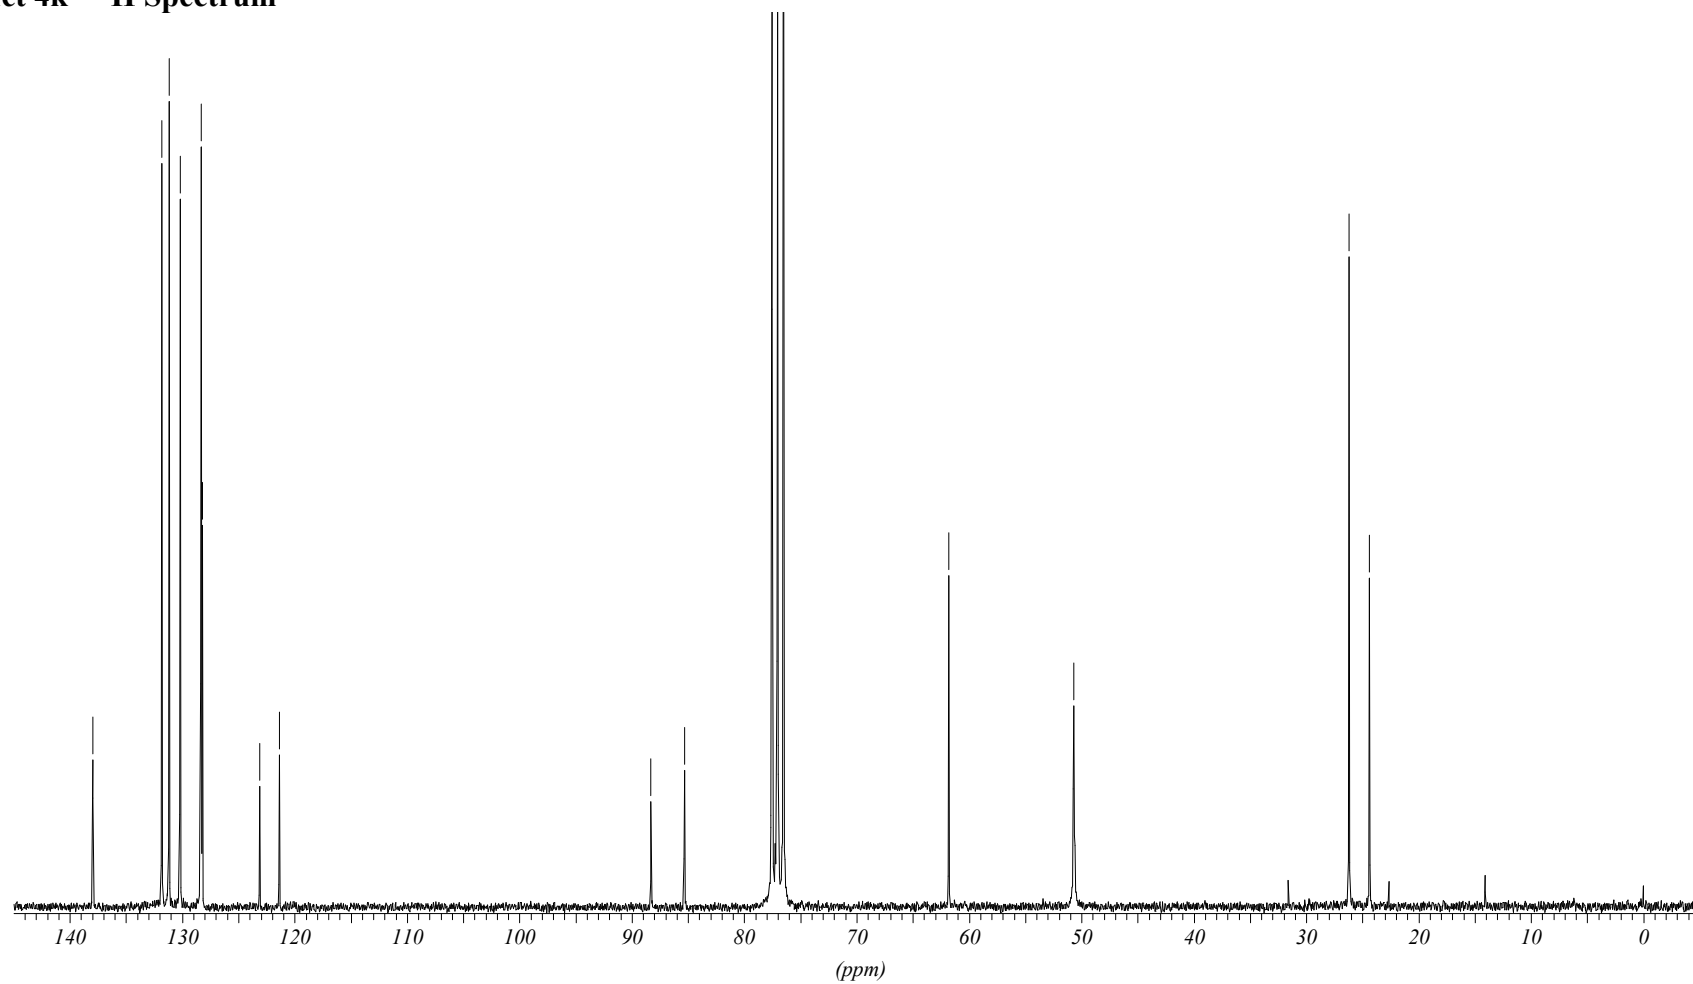

# Product 4k – IR Spectrum

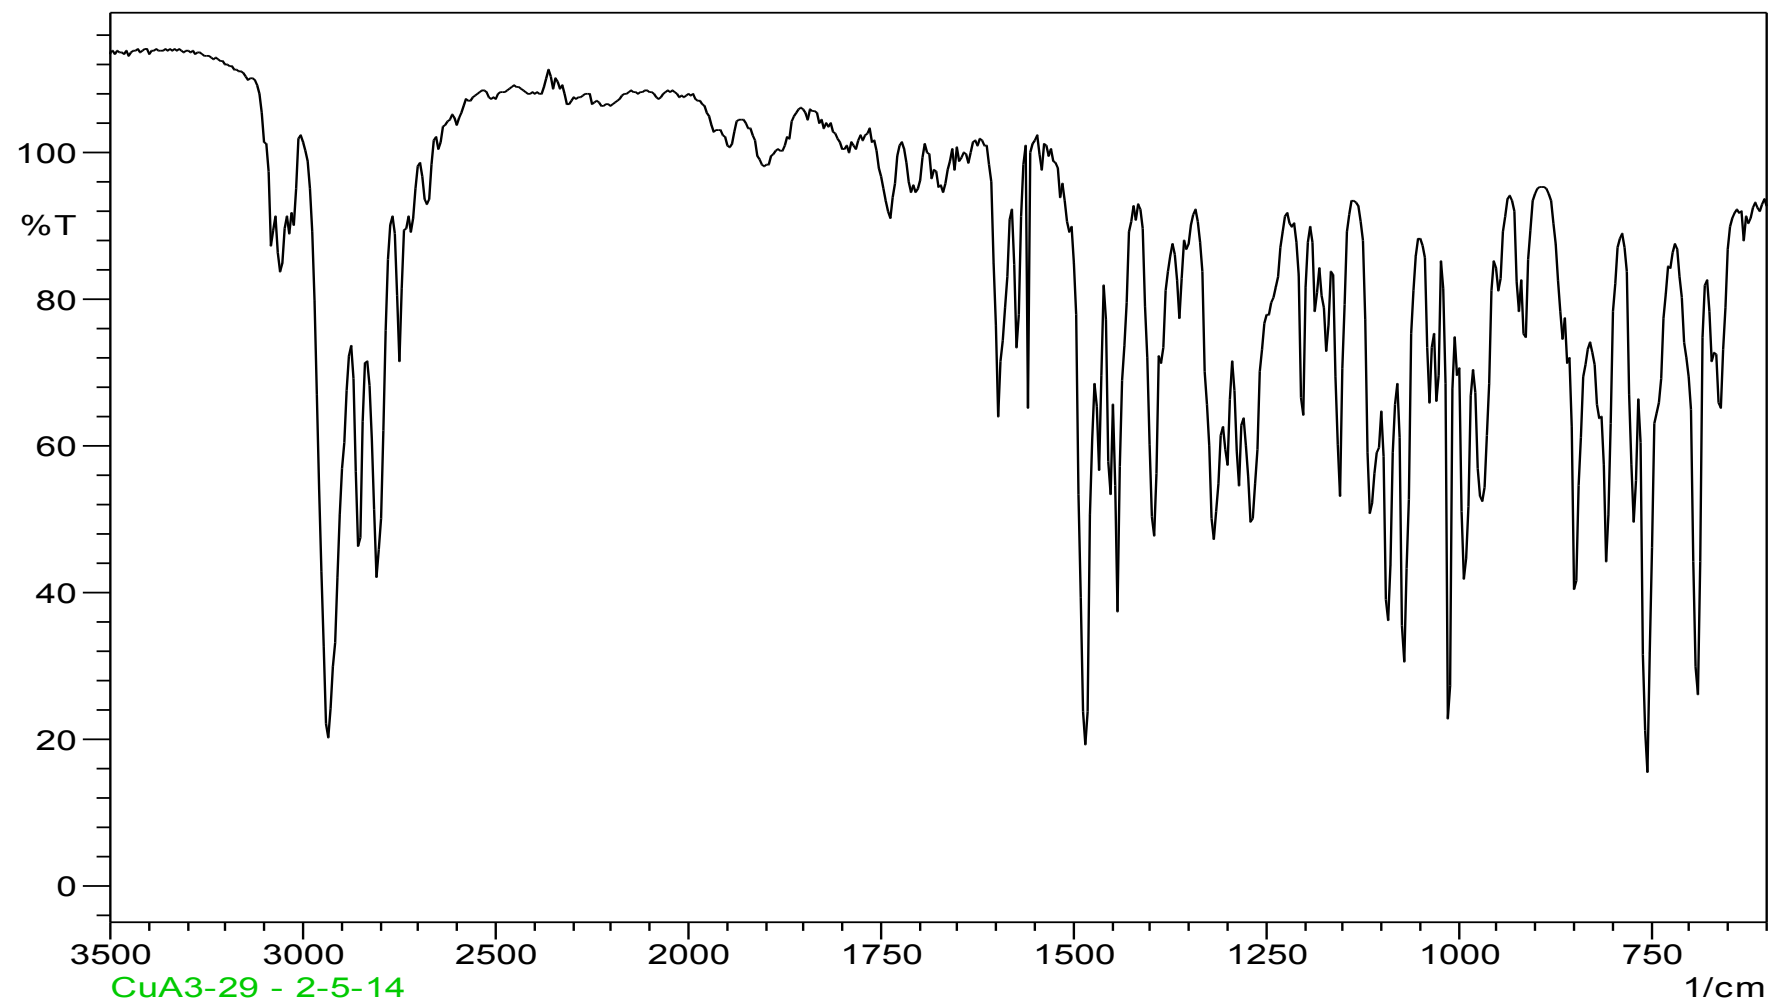

**Product 4I – <sup>1</sup>H Spectrum**

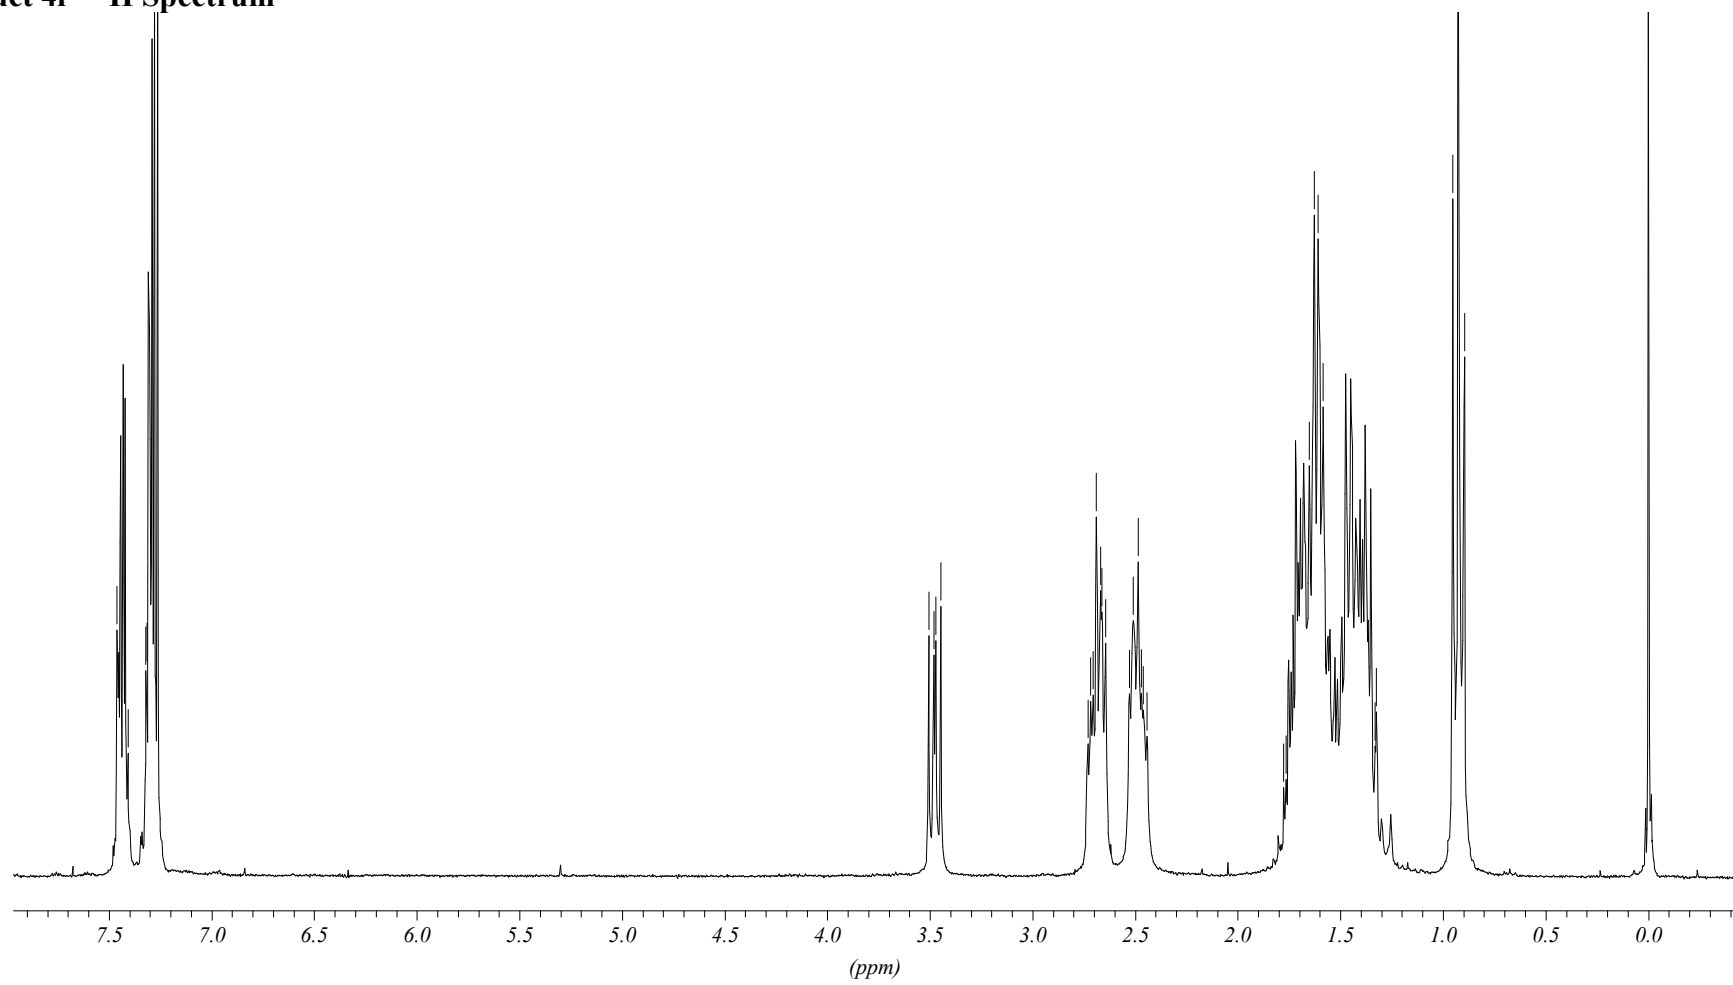

**Product 4I – <sup>13</sup>C Spectrum**

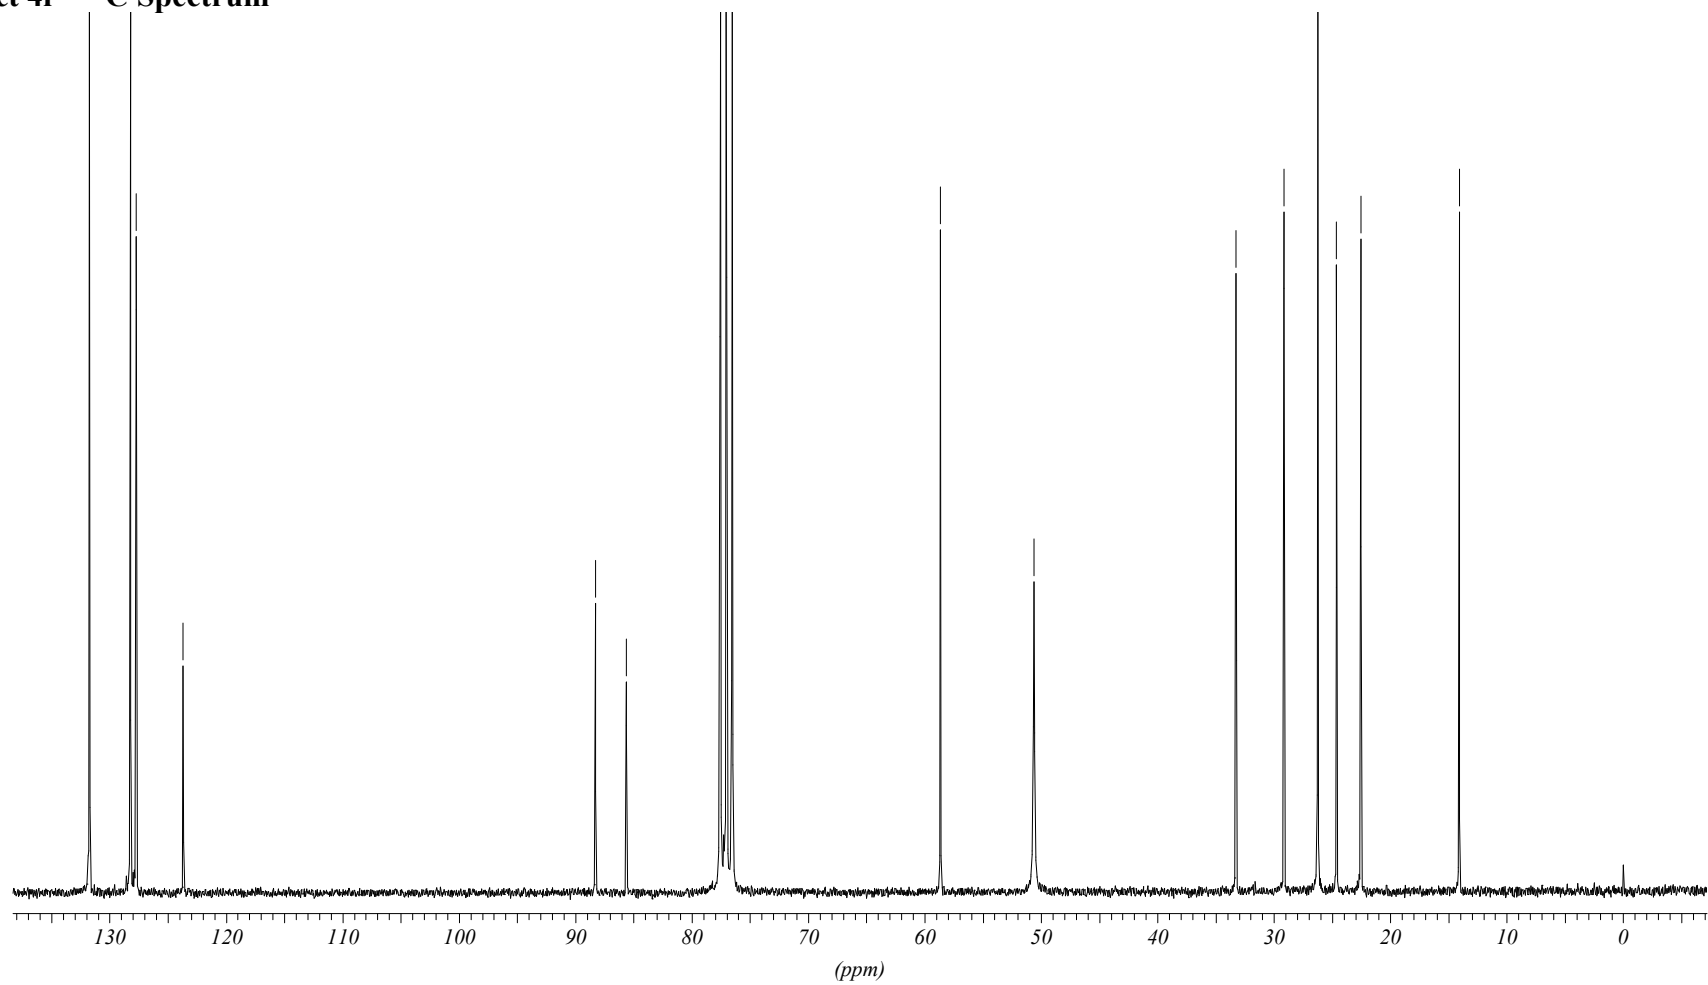



# Product 4I – IR Spectrum

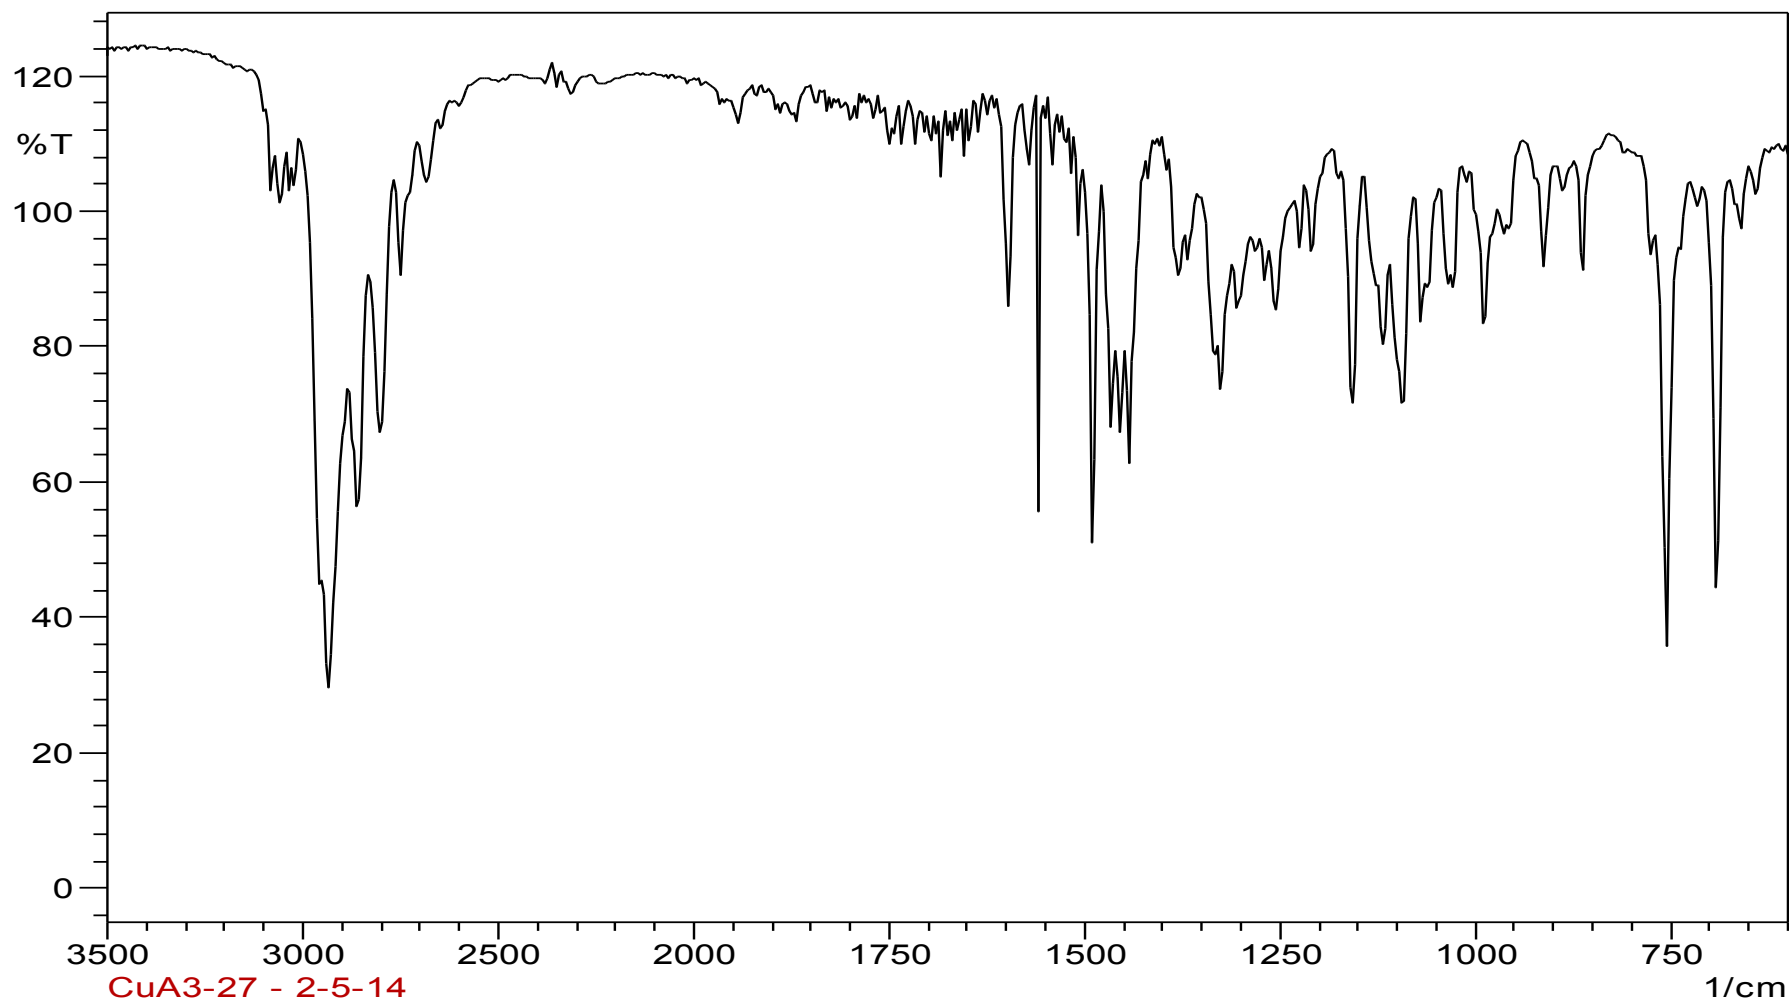

**Product 4m –  $^1\text{H}$  Spectrum**

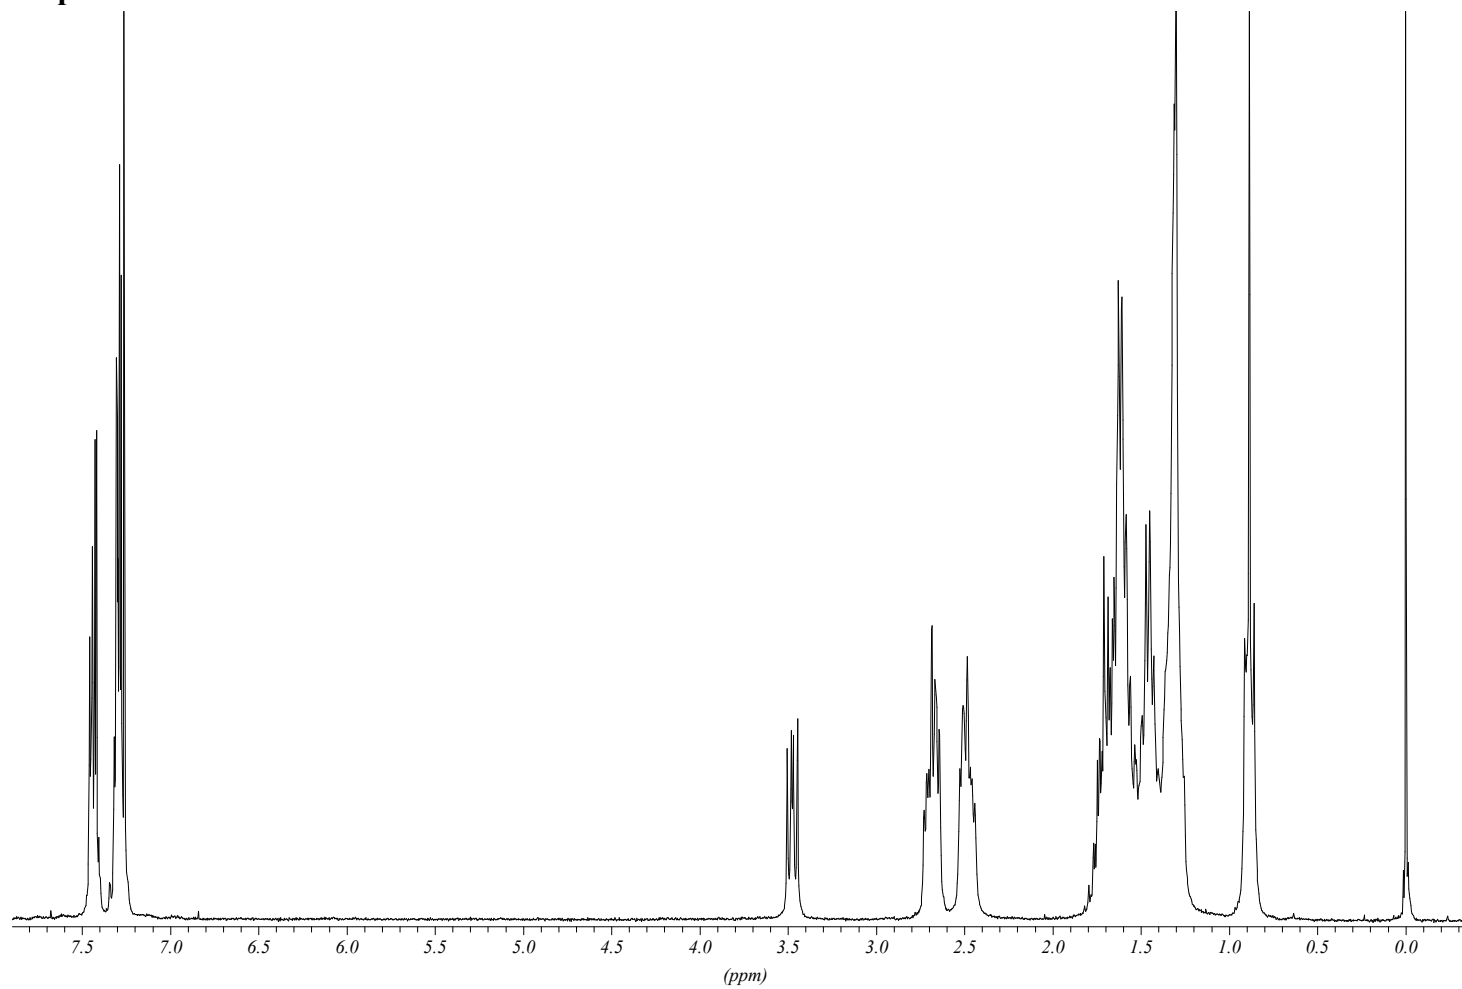

**Product 4m – <sup>13</sup>C Spectrum**

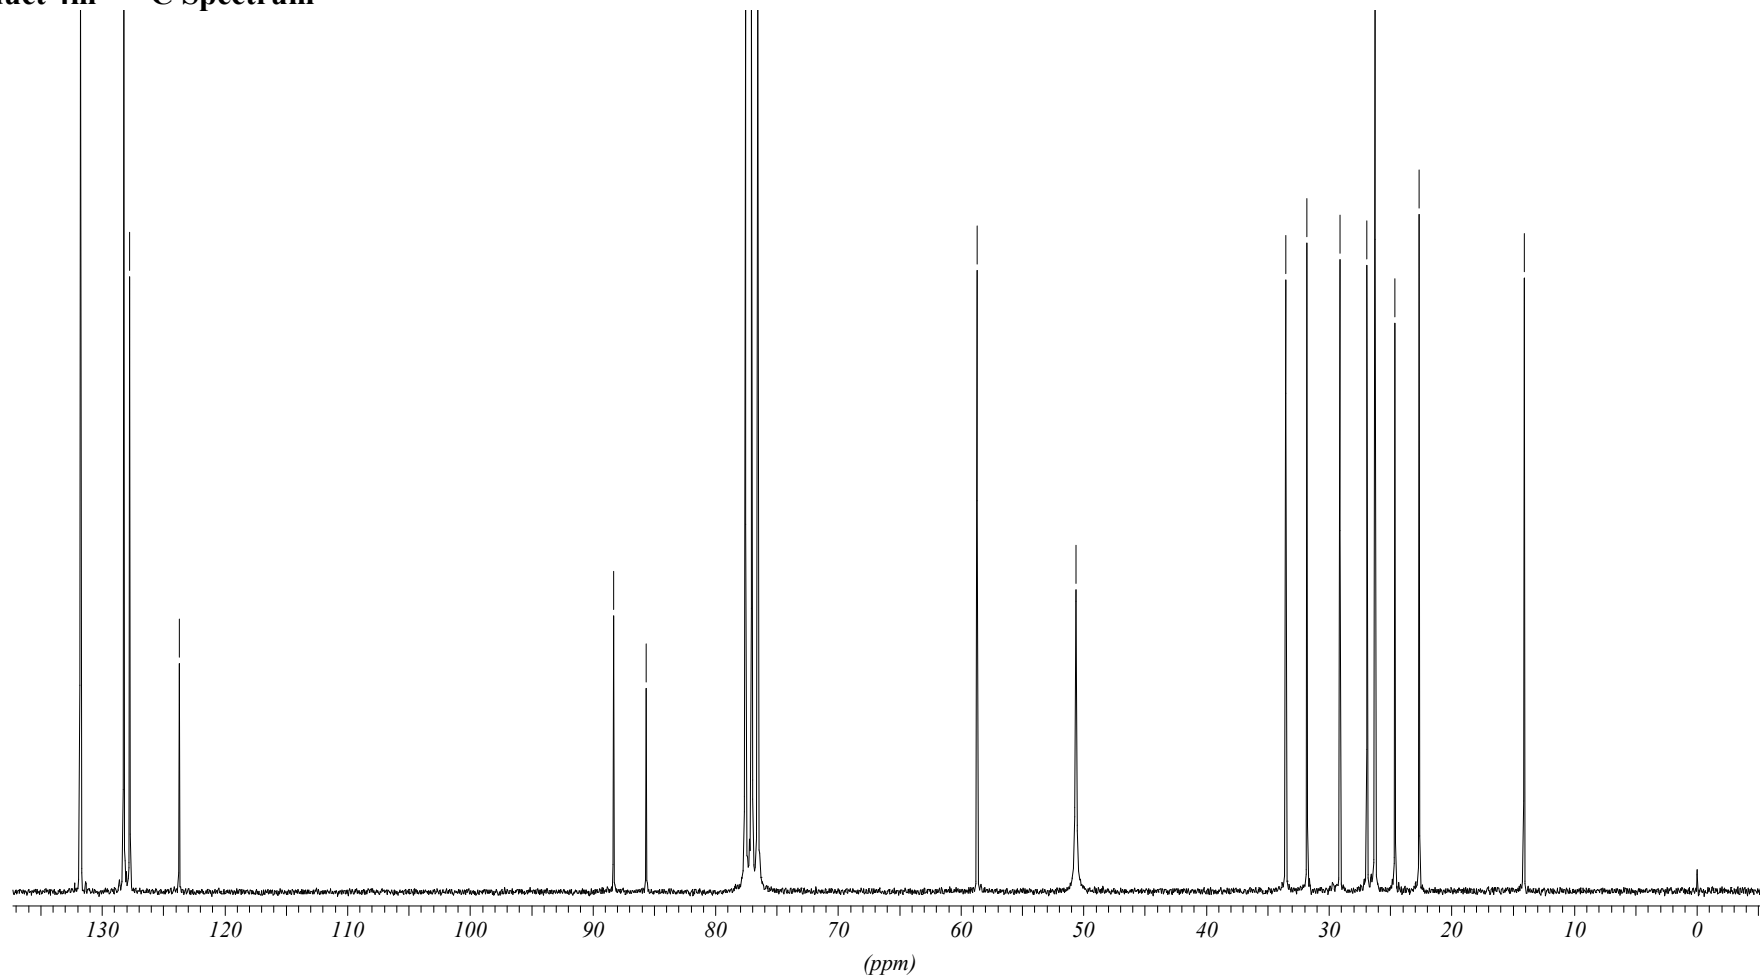

**Product 4m – IR Spectrum**

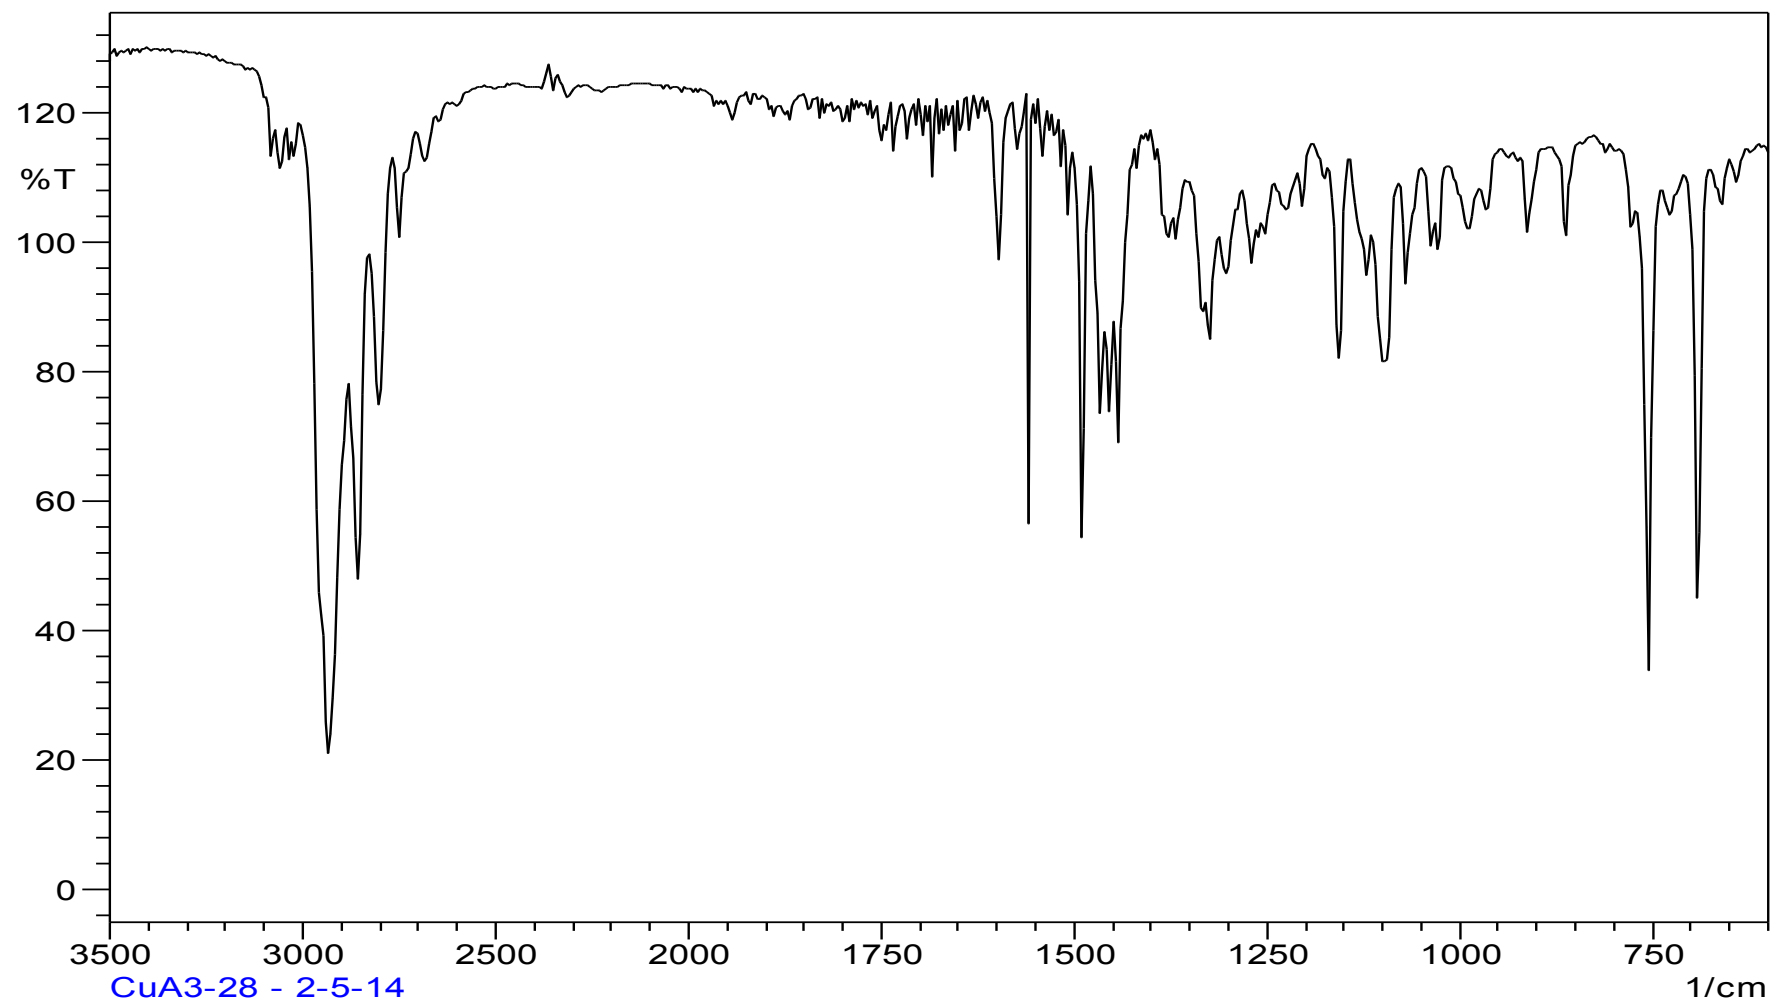

**Product 4n – <sup>1</sup>H Spectrum**

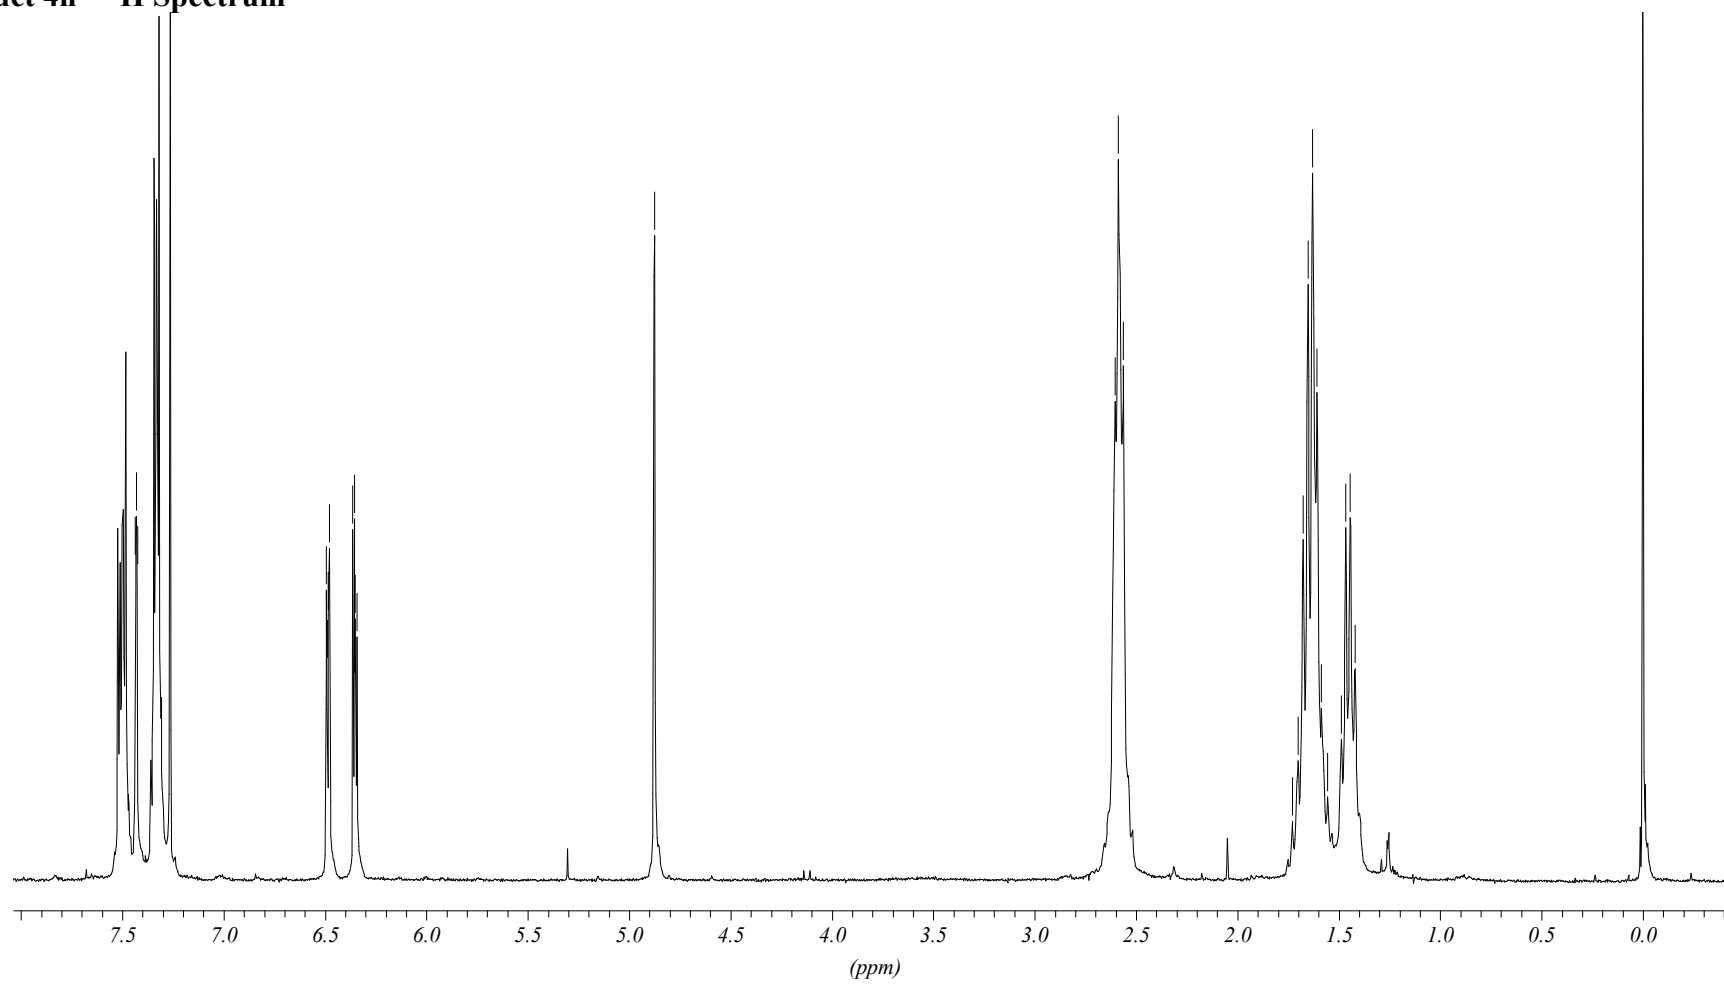

**Product 4n – <sup>13</sup>C Spectrum**

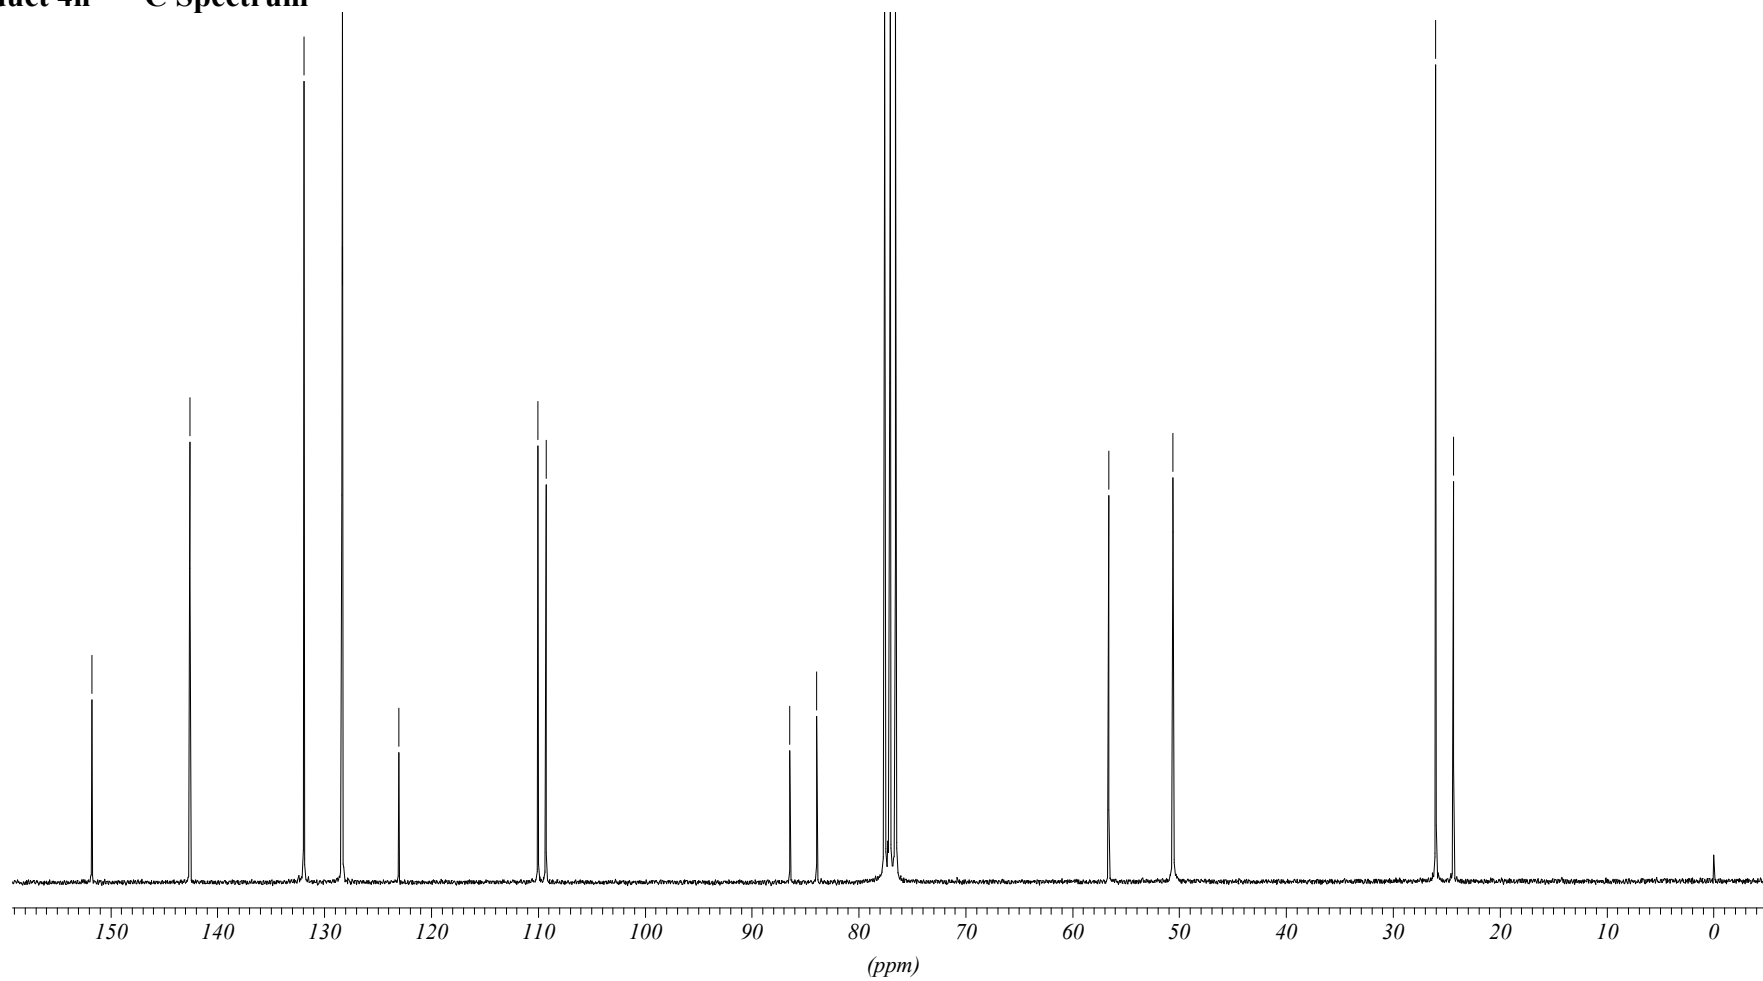

# Product 4n – IR Spectrum

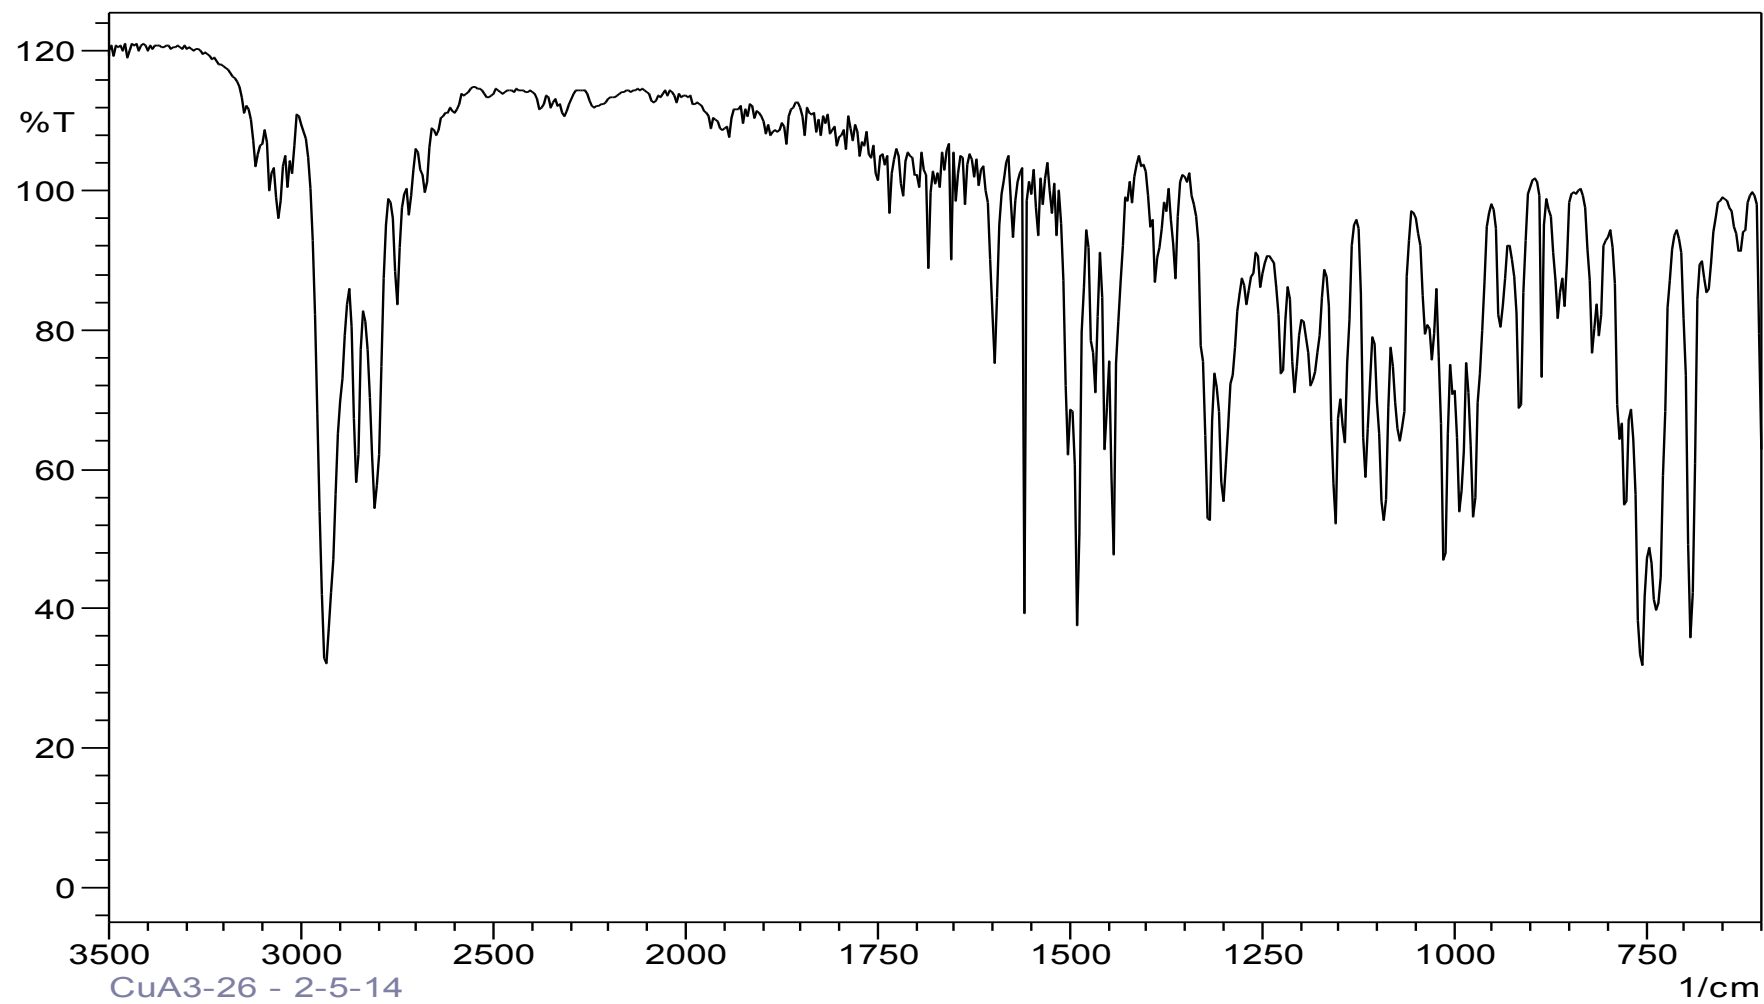

**Product 4o – <sup>1</sup>H Spectrum**

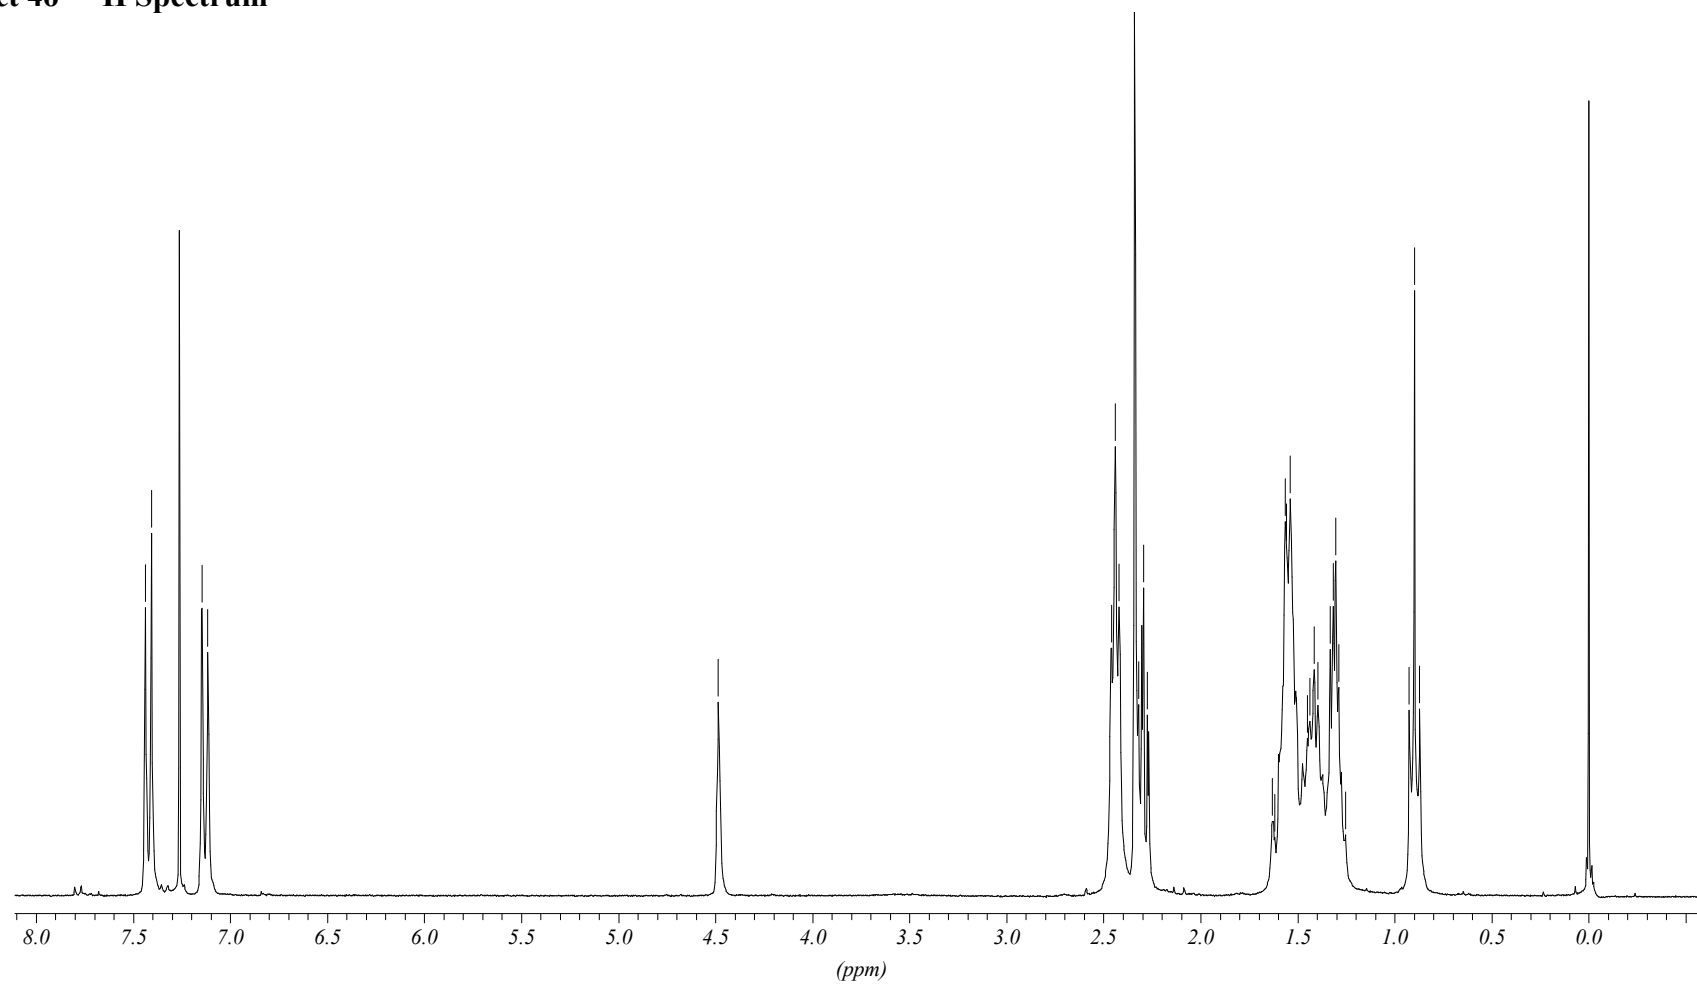



# Product 4o – <sup>13</sup>C Spectrum

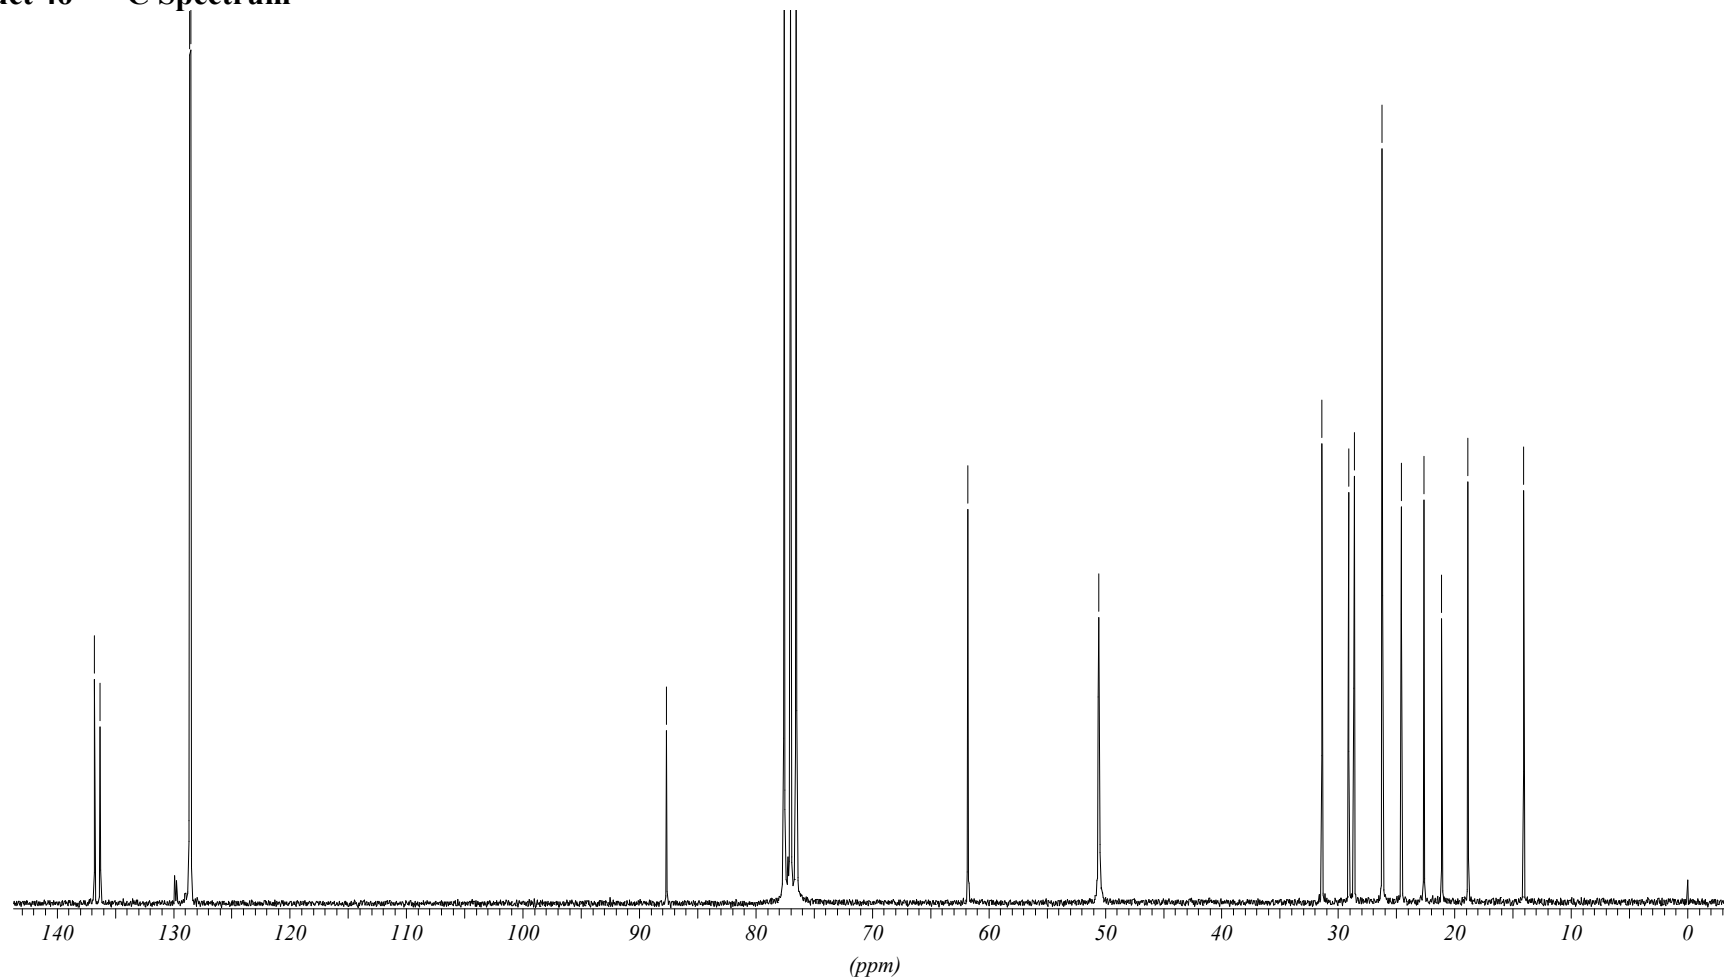

**Product 4o – IR Spectrum**

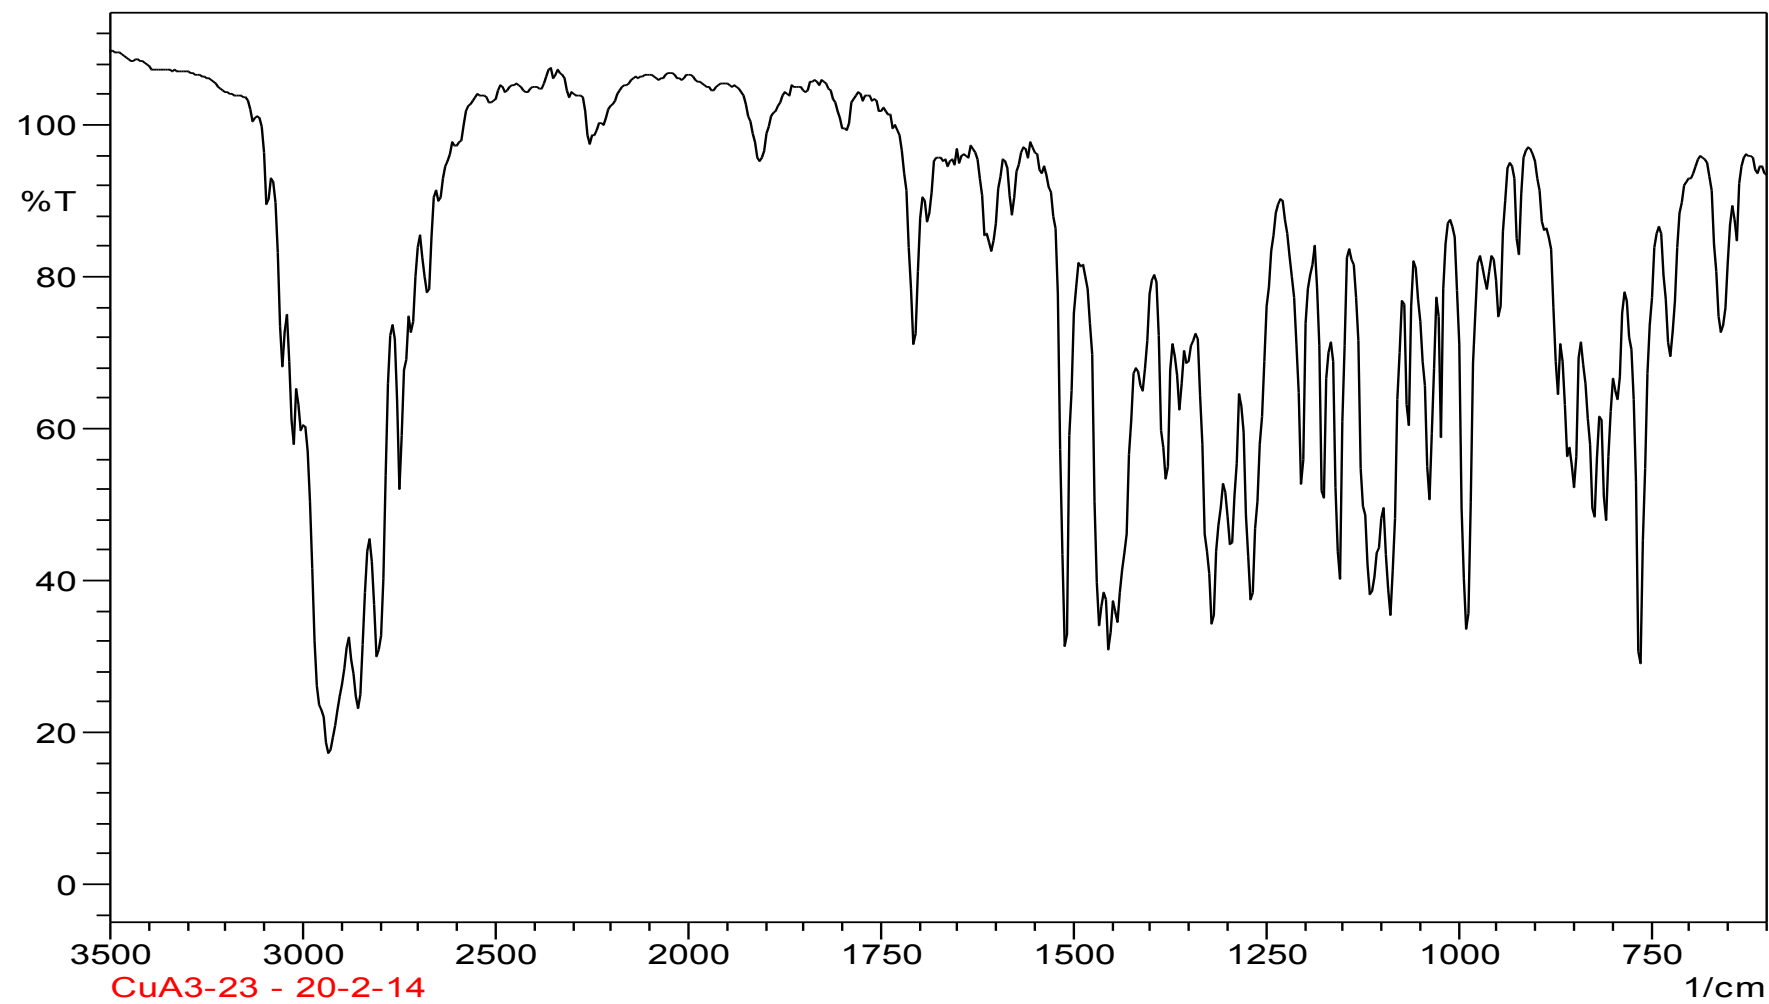

**Product 4o – GC-MS Spectrum**

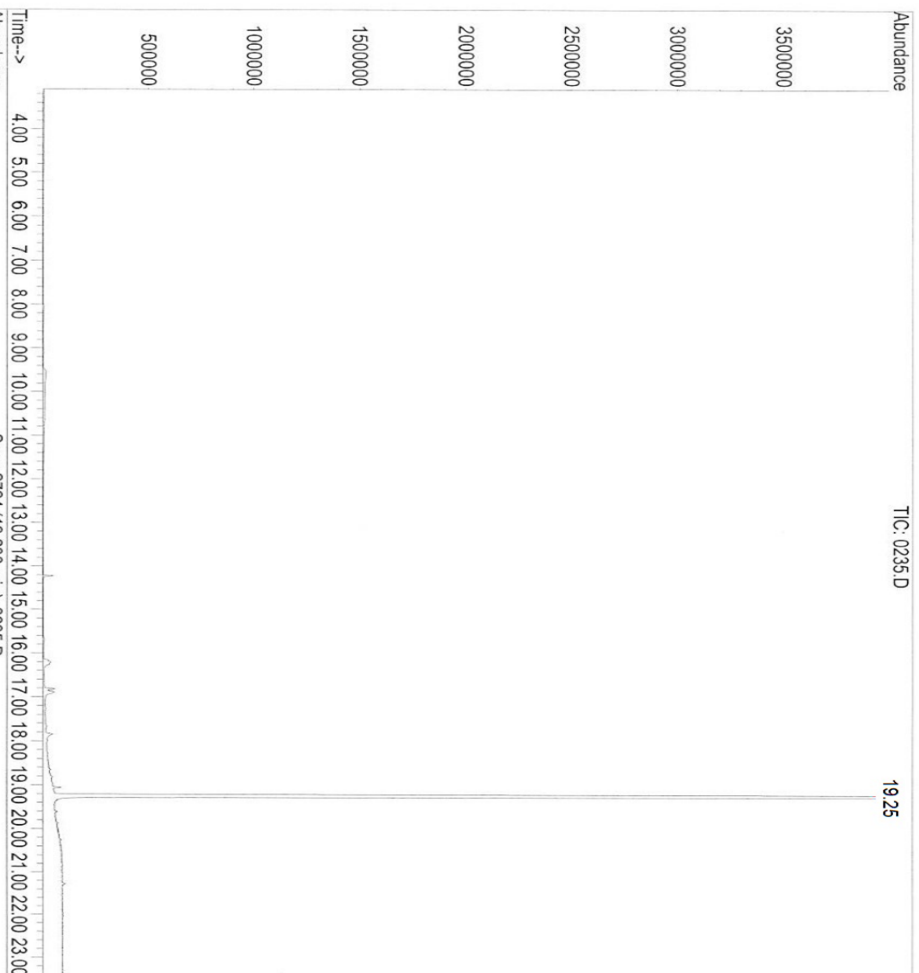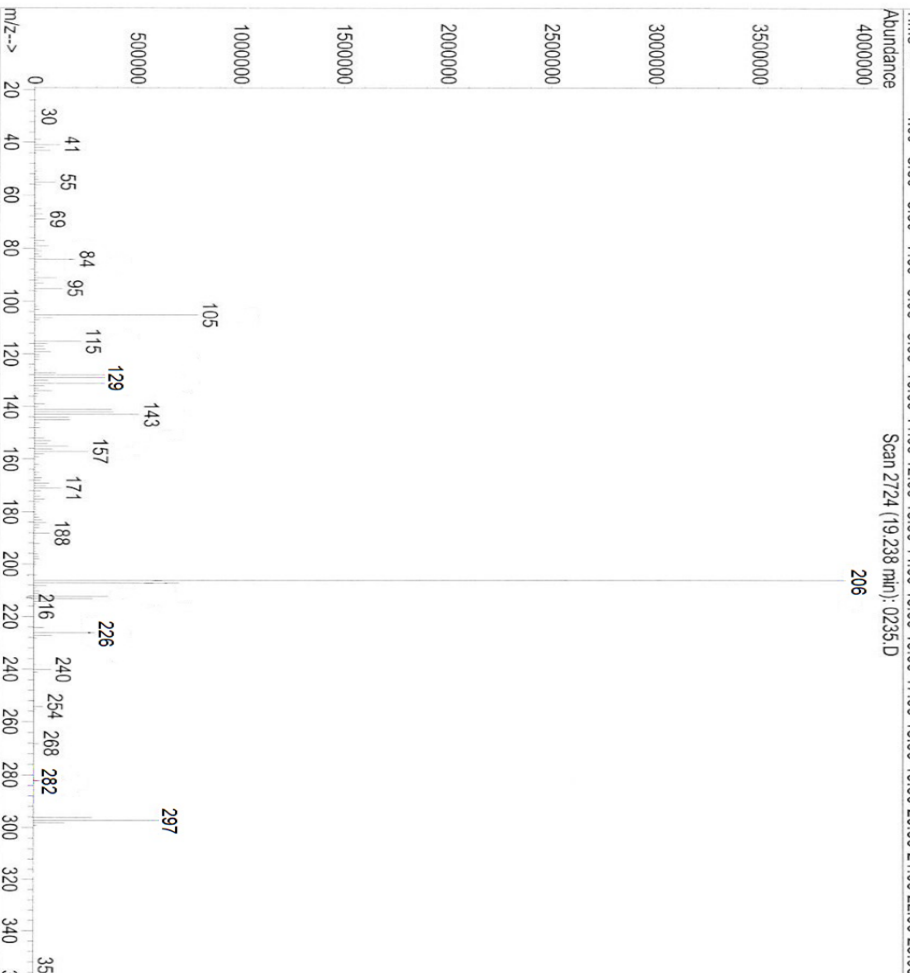

**Product 4p –  $^1\text{H}$  Spectrum**

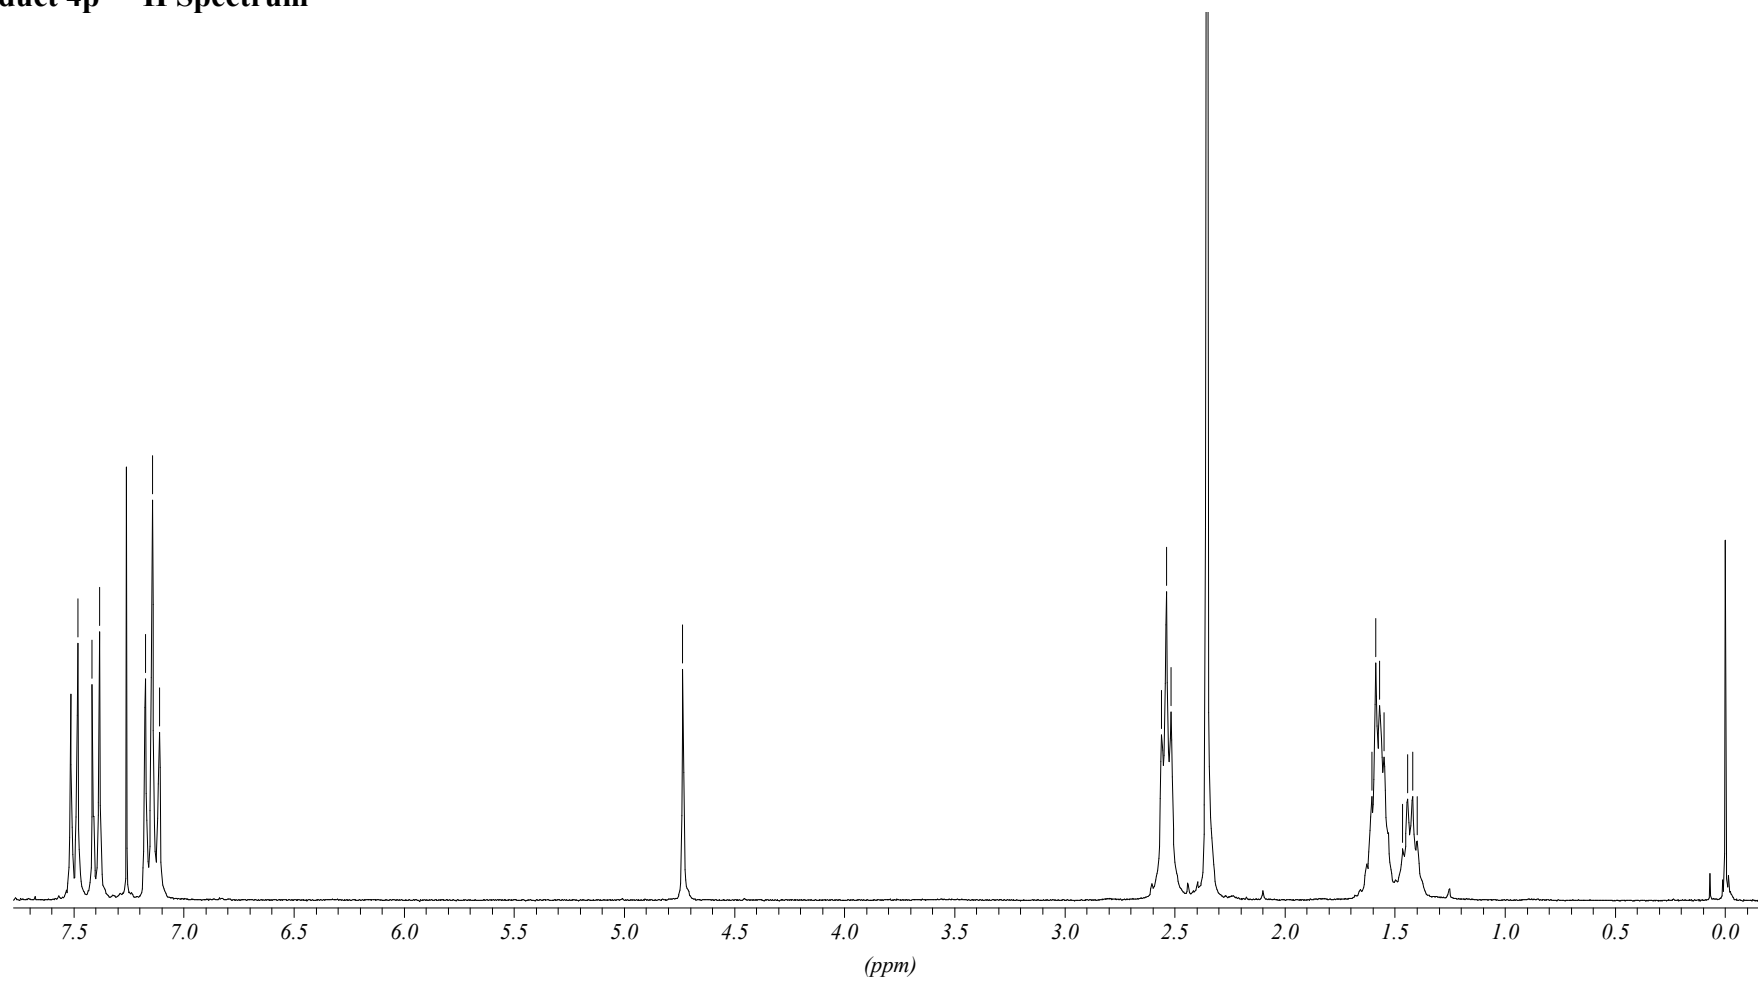

**Product 4p – <sup>13</sup>C Spectrum**

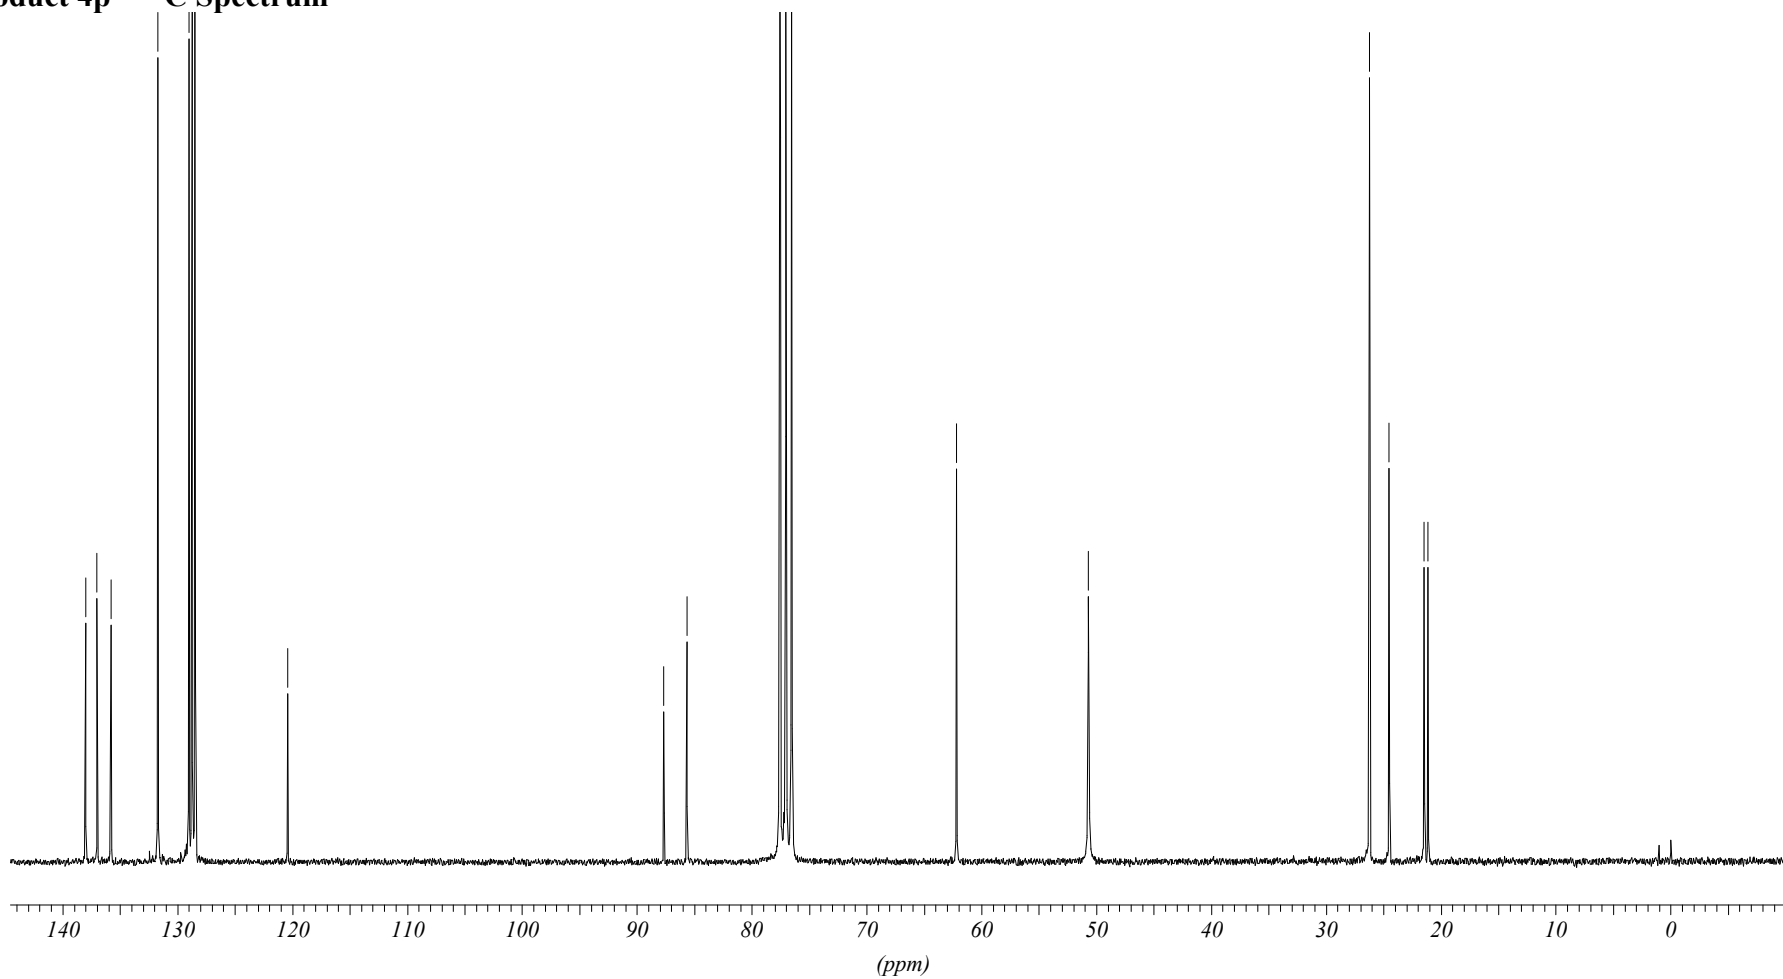

**Product 4p – IR Spectrum**

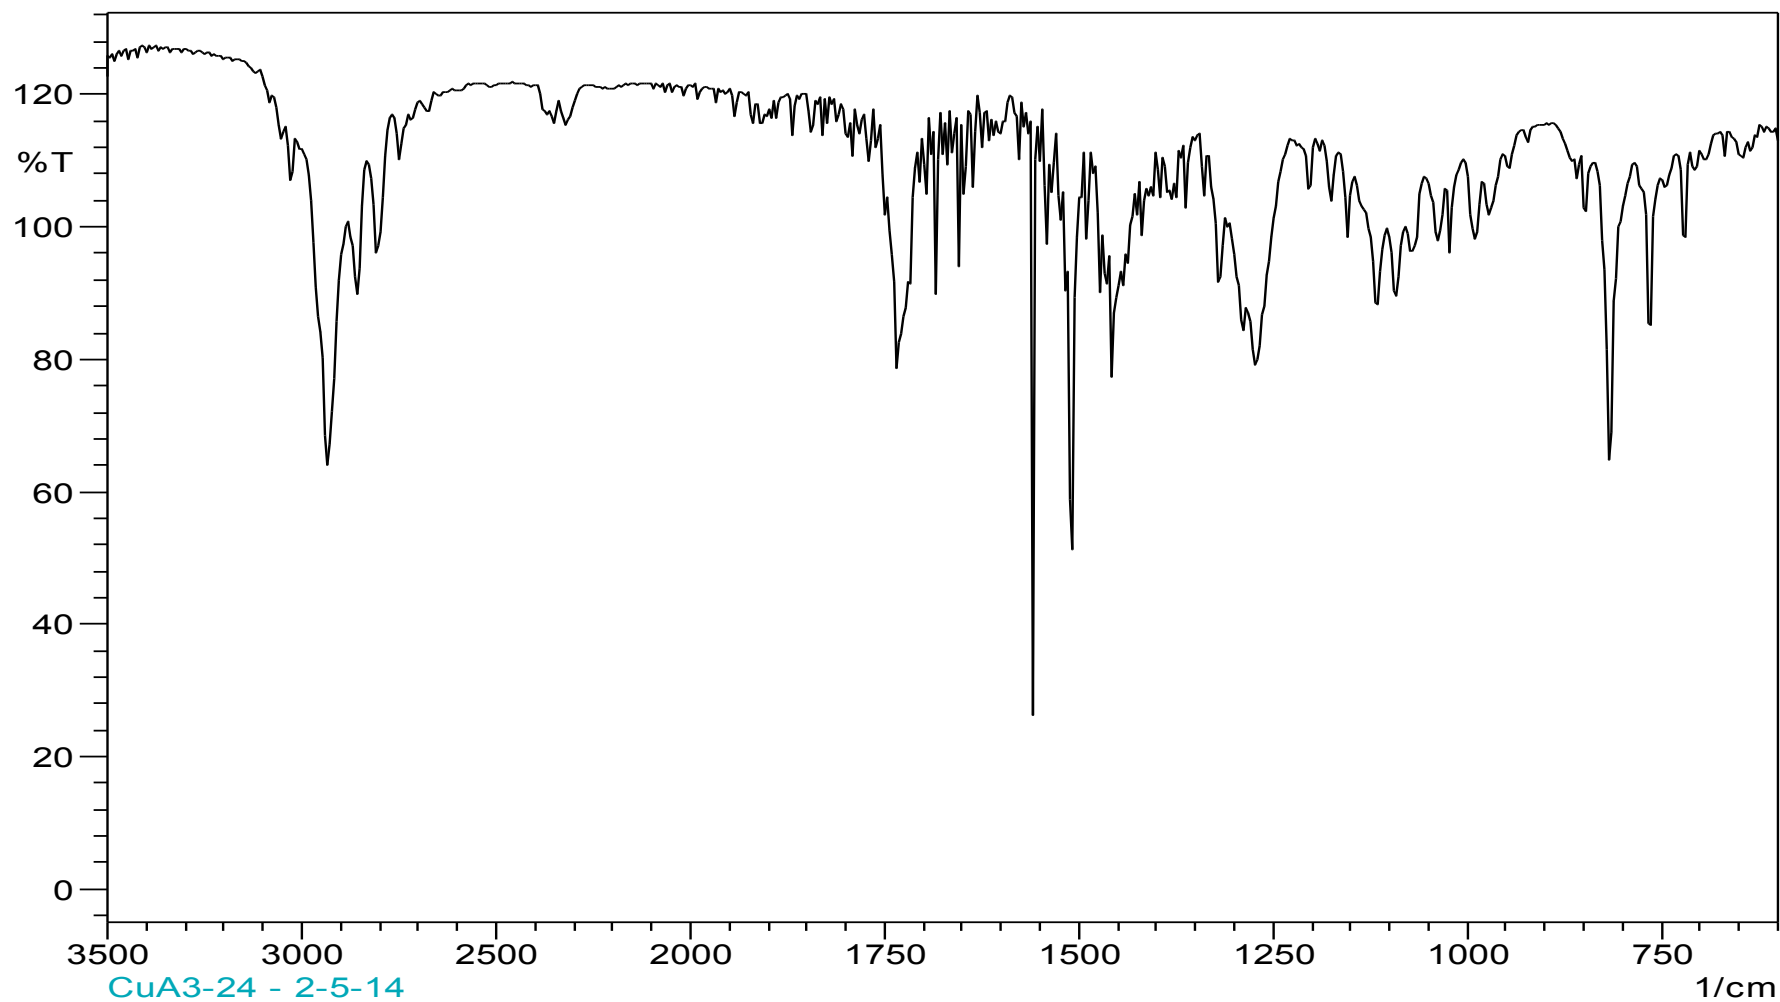

# Product 4p – GC-MS Spectrum

RT: 0.00 - 27.88

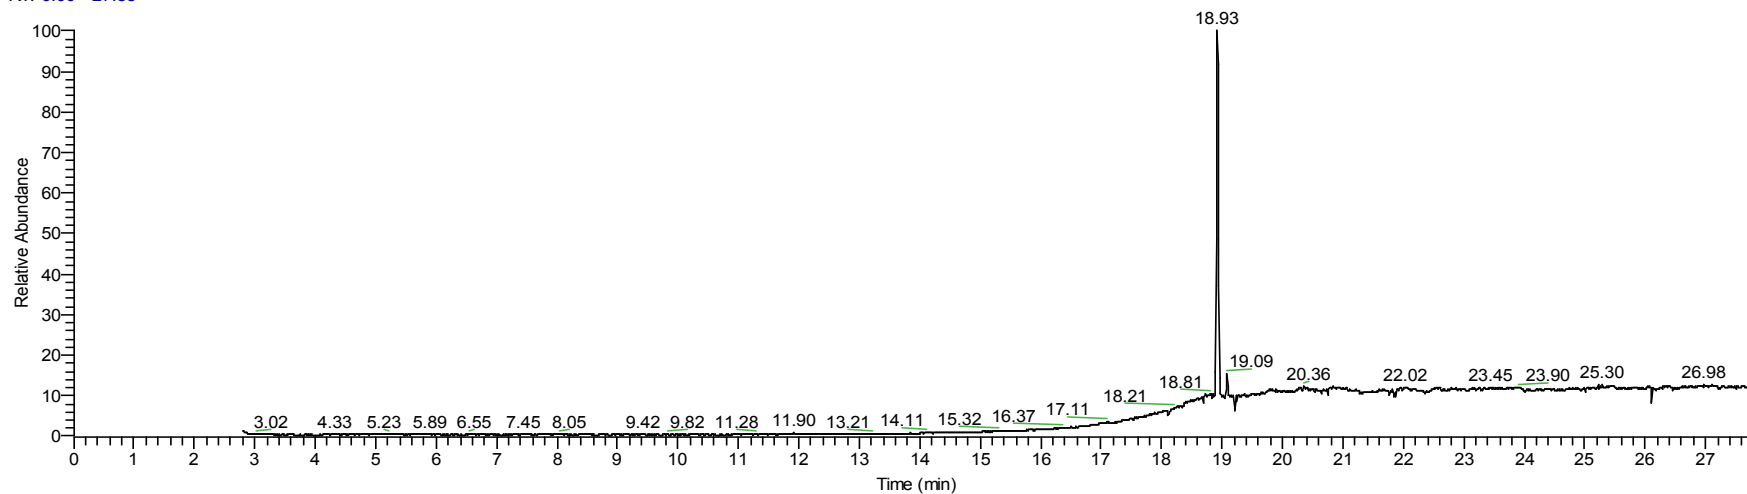

NL:  
2.18E7  
TIC F: MS  
CuA3-24r1

CuA3-24r1 #1271 RT: 18.93 AV: 1 SB: 2 10.76, 17.08 NL: 6.60E6  
T: + c Full ms [ 30.00-400.00]

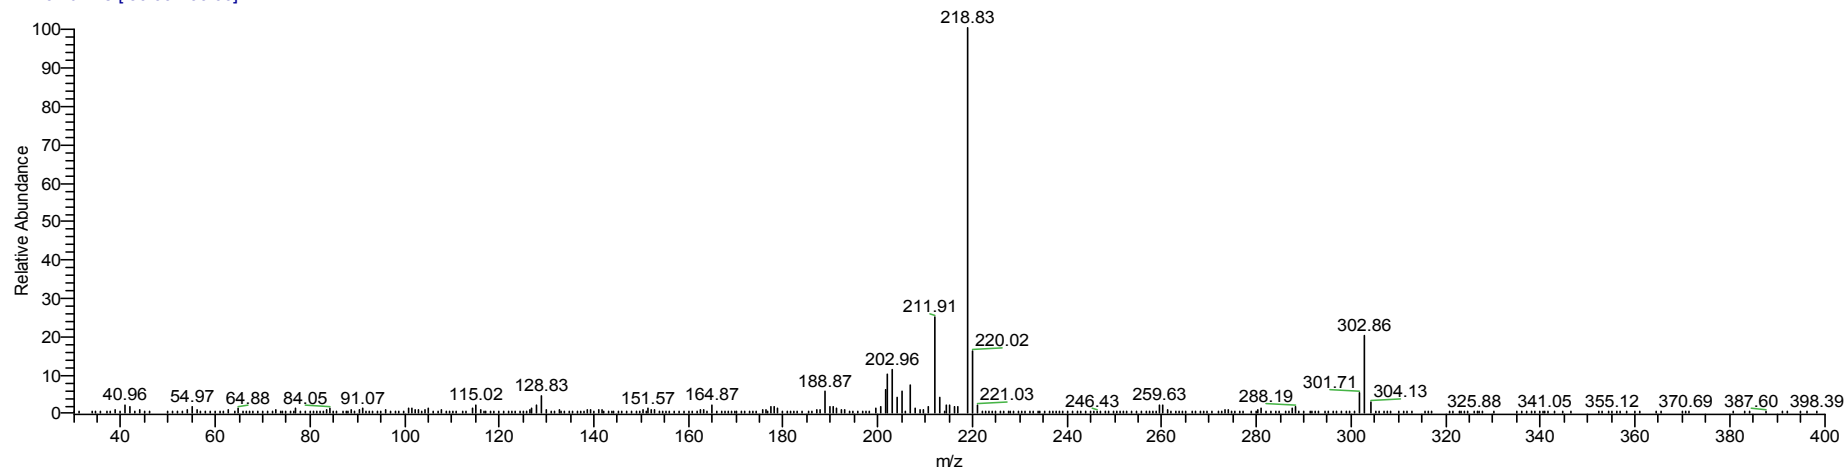



**Product 4q – <sup>1</sup>H Spectrum**

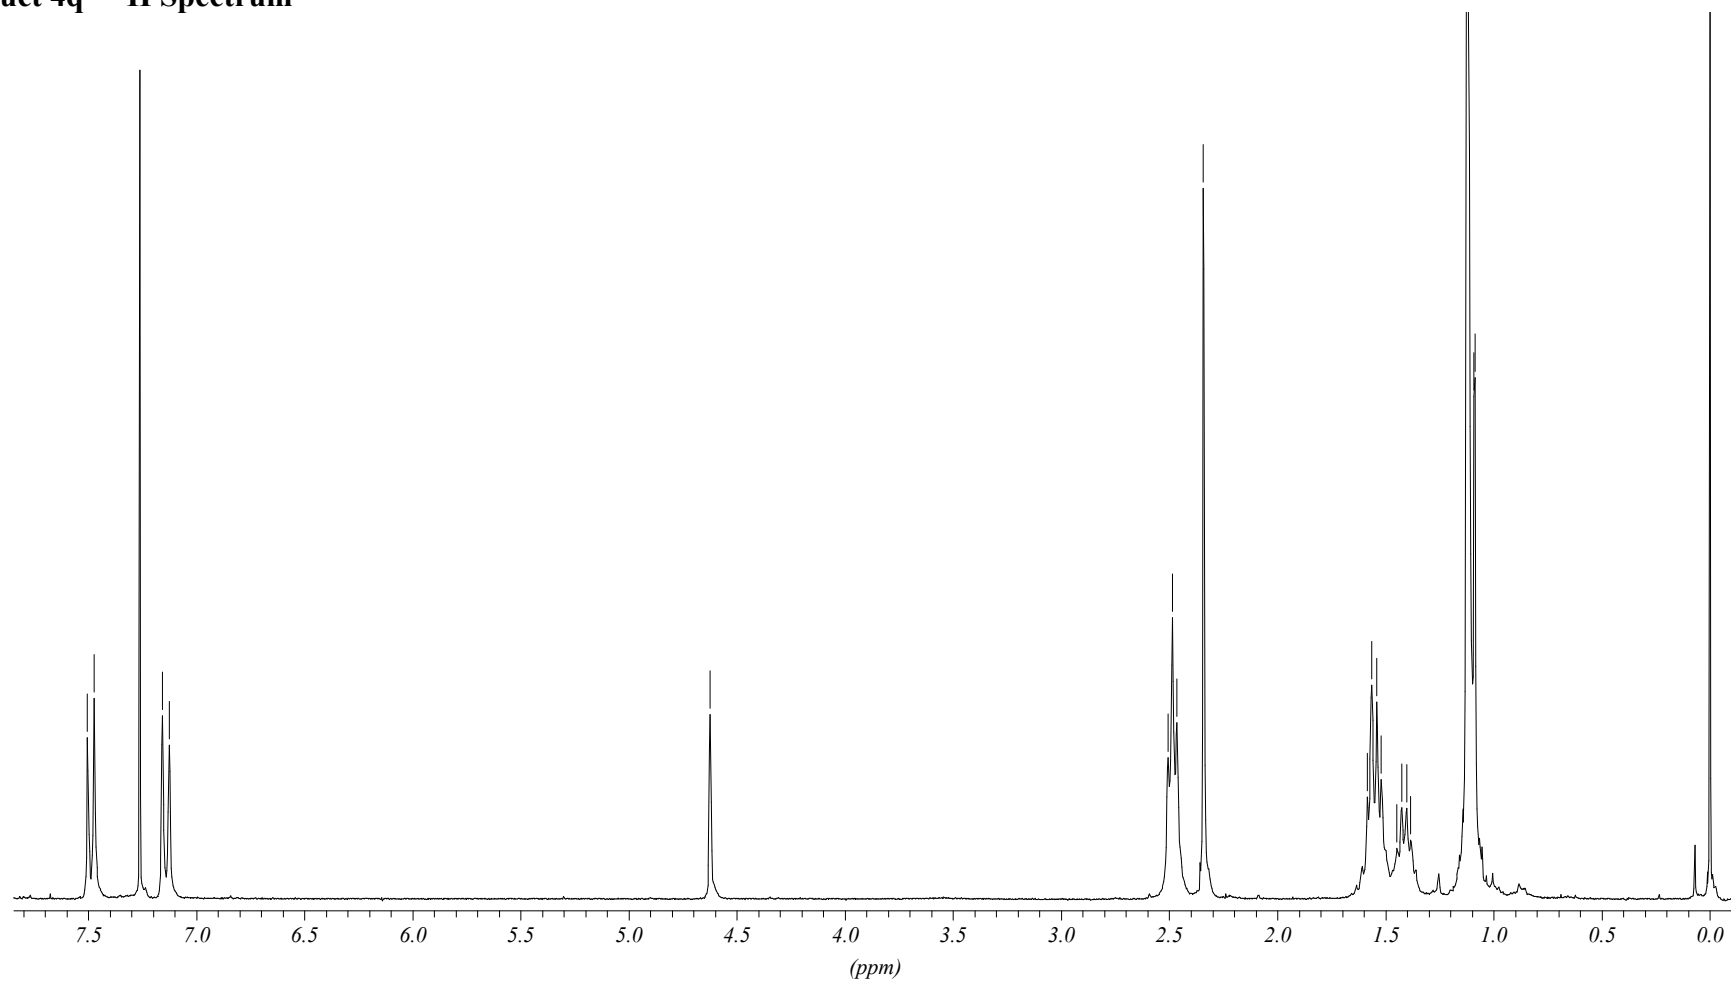

**Product 4q –  $^{13}\text{C}$  Spectrum**

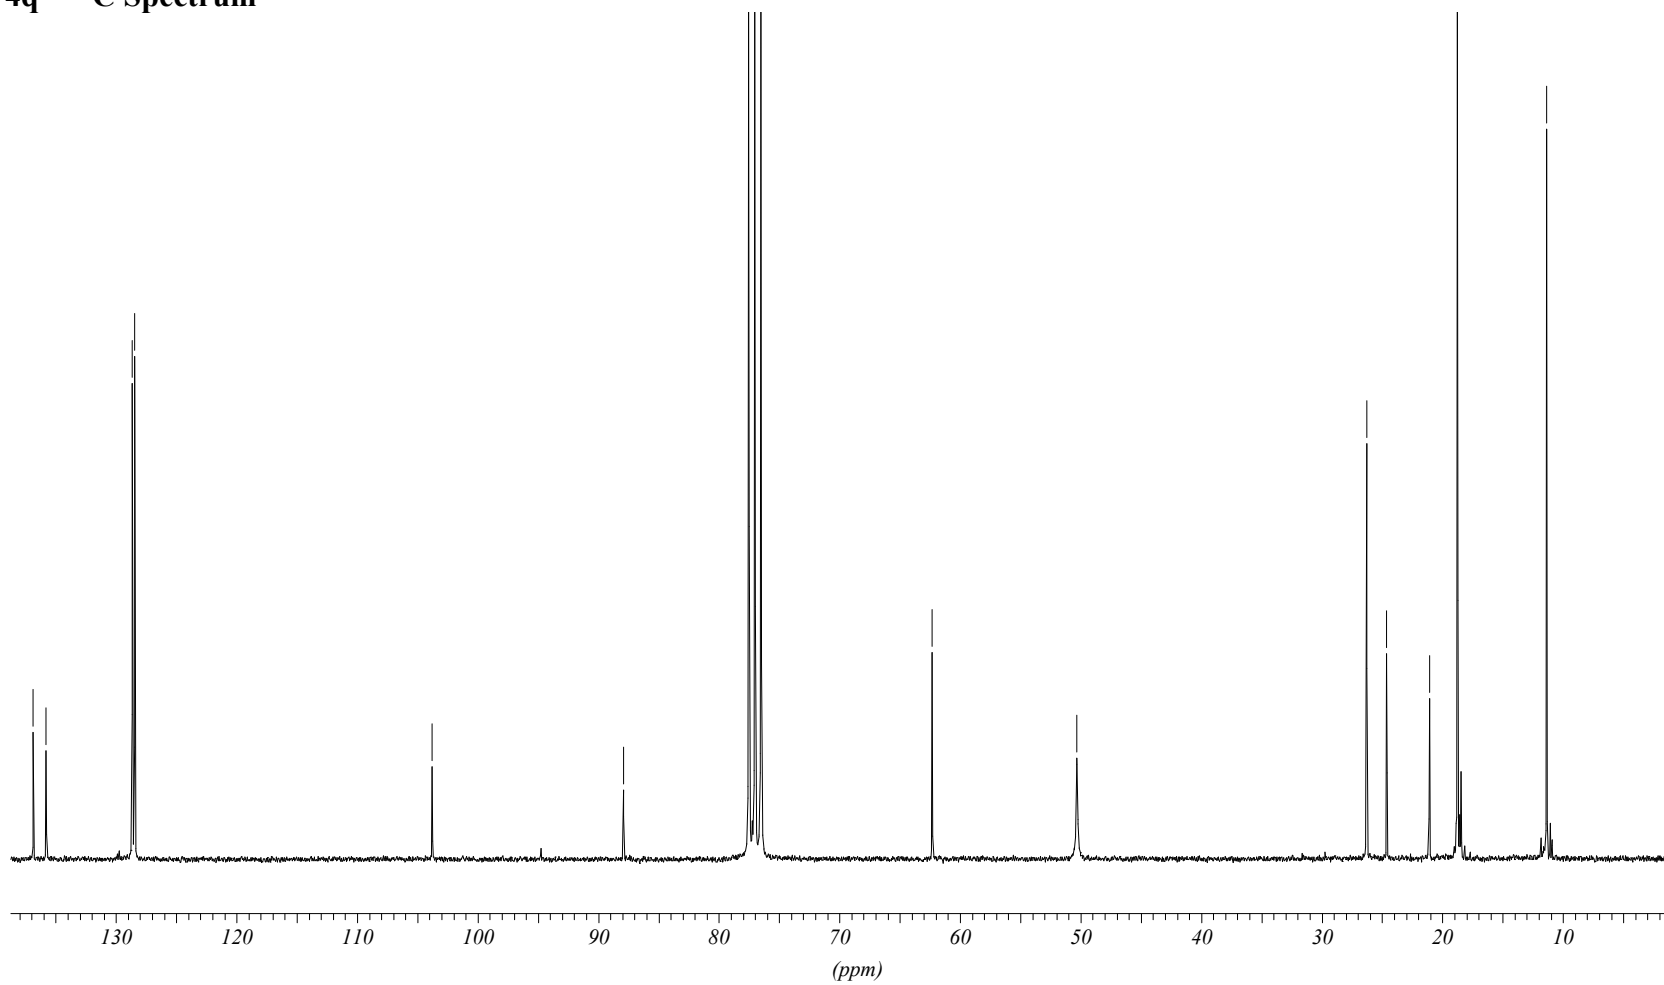

# Product 4q – IR Spectrum

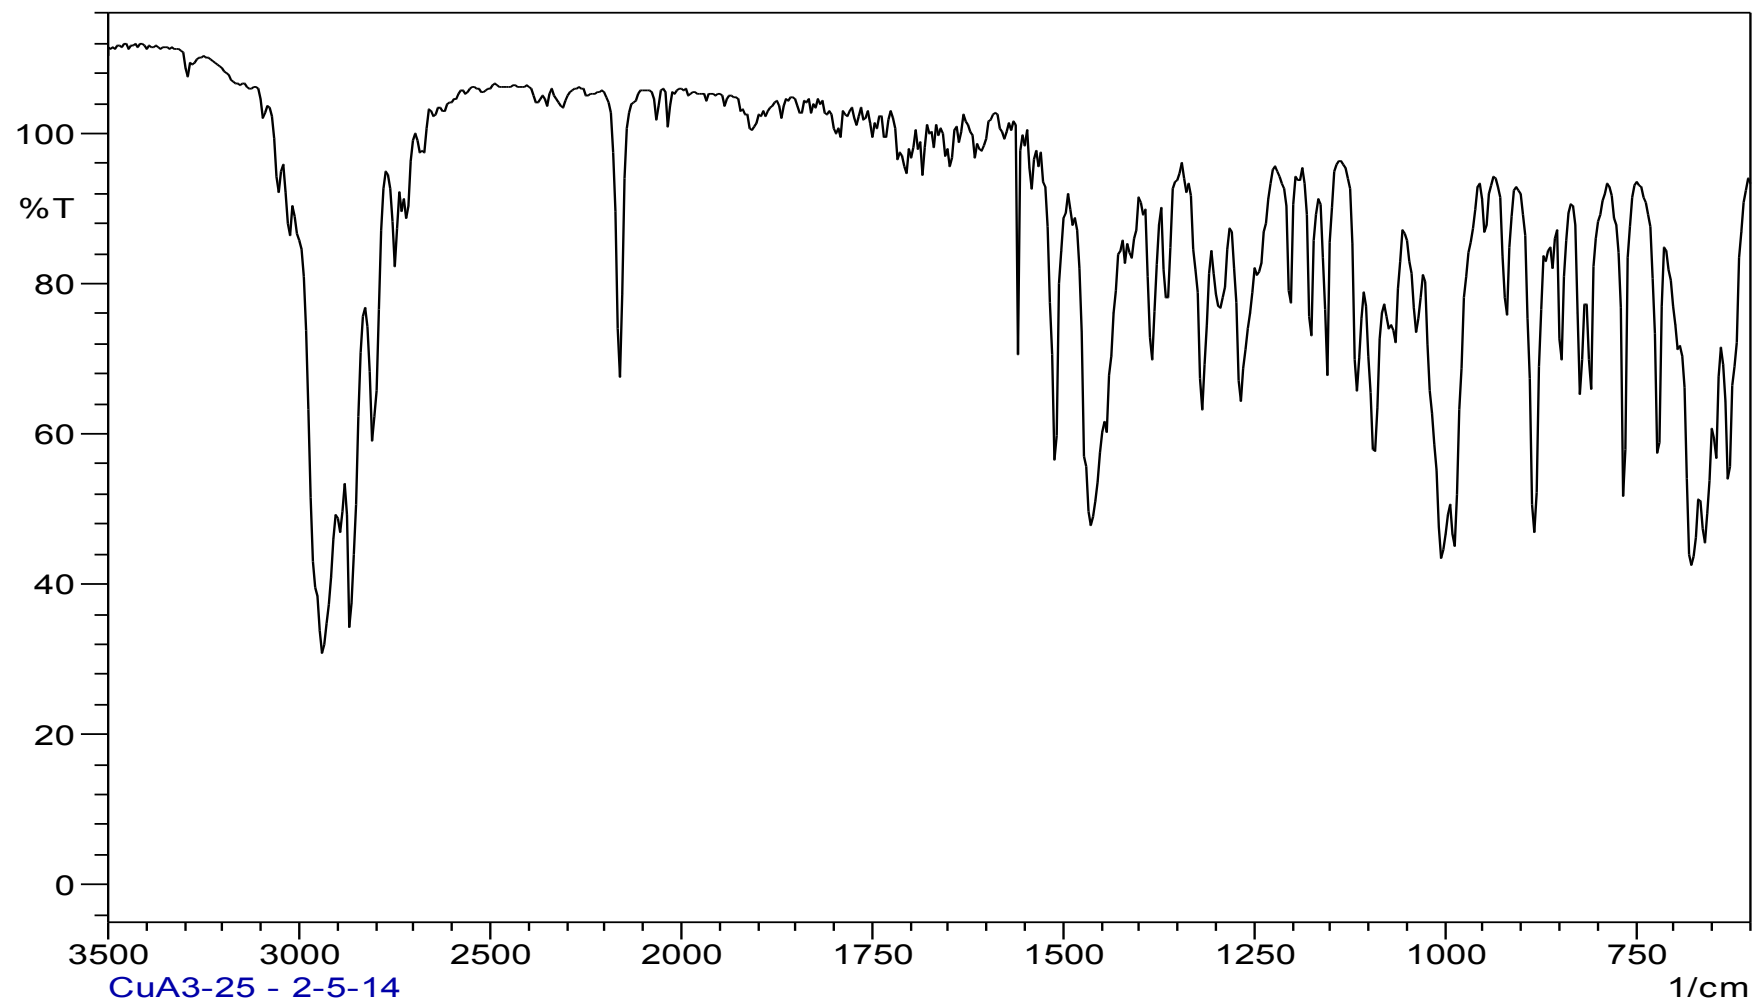

**Product 4q – GC-MS Spectrum**

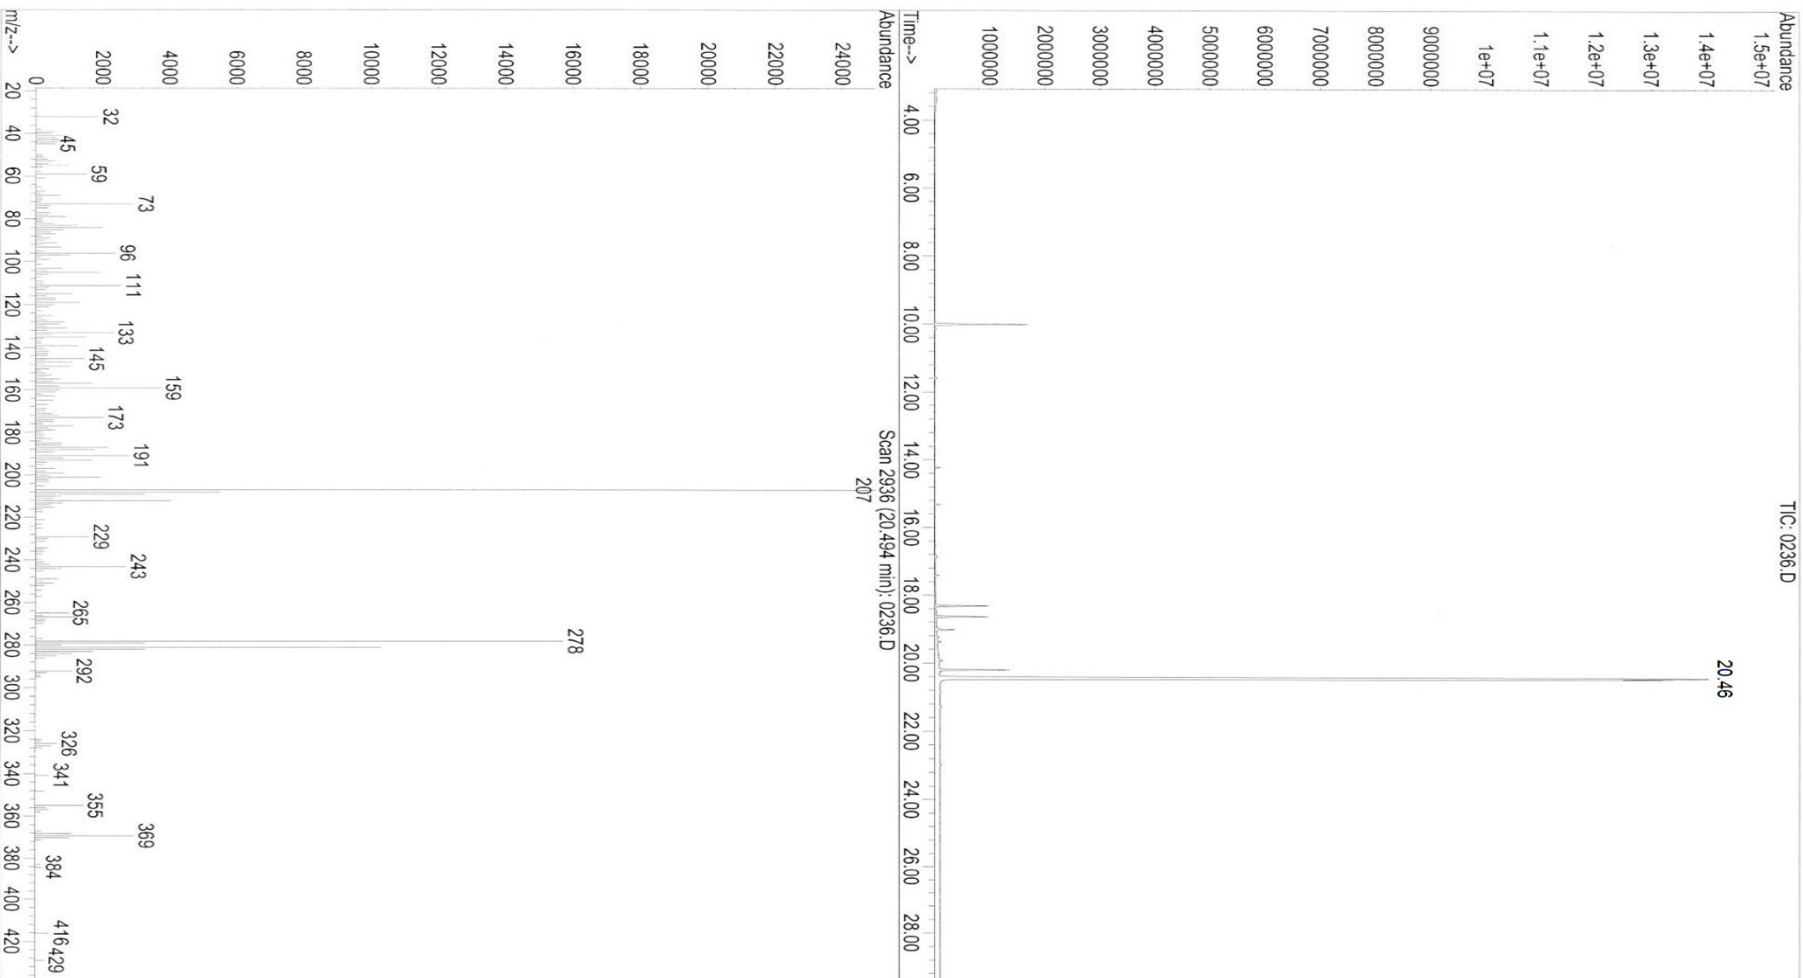

**Product 4r –  $^1\text{H}$  Spectrum**

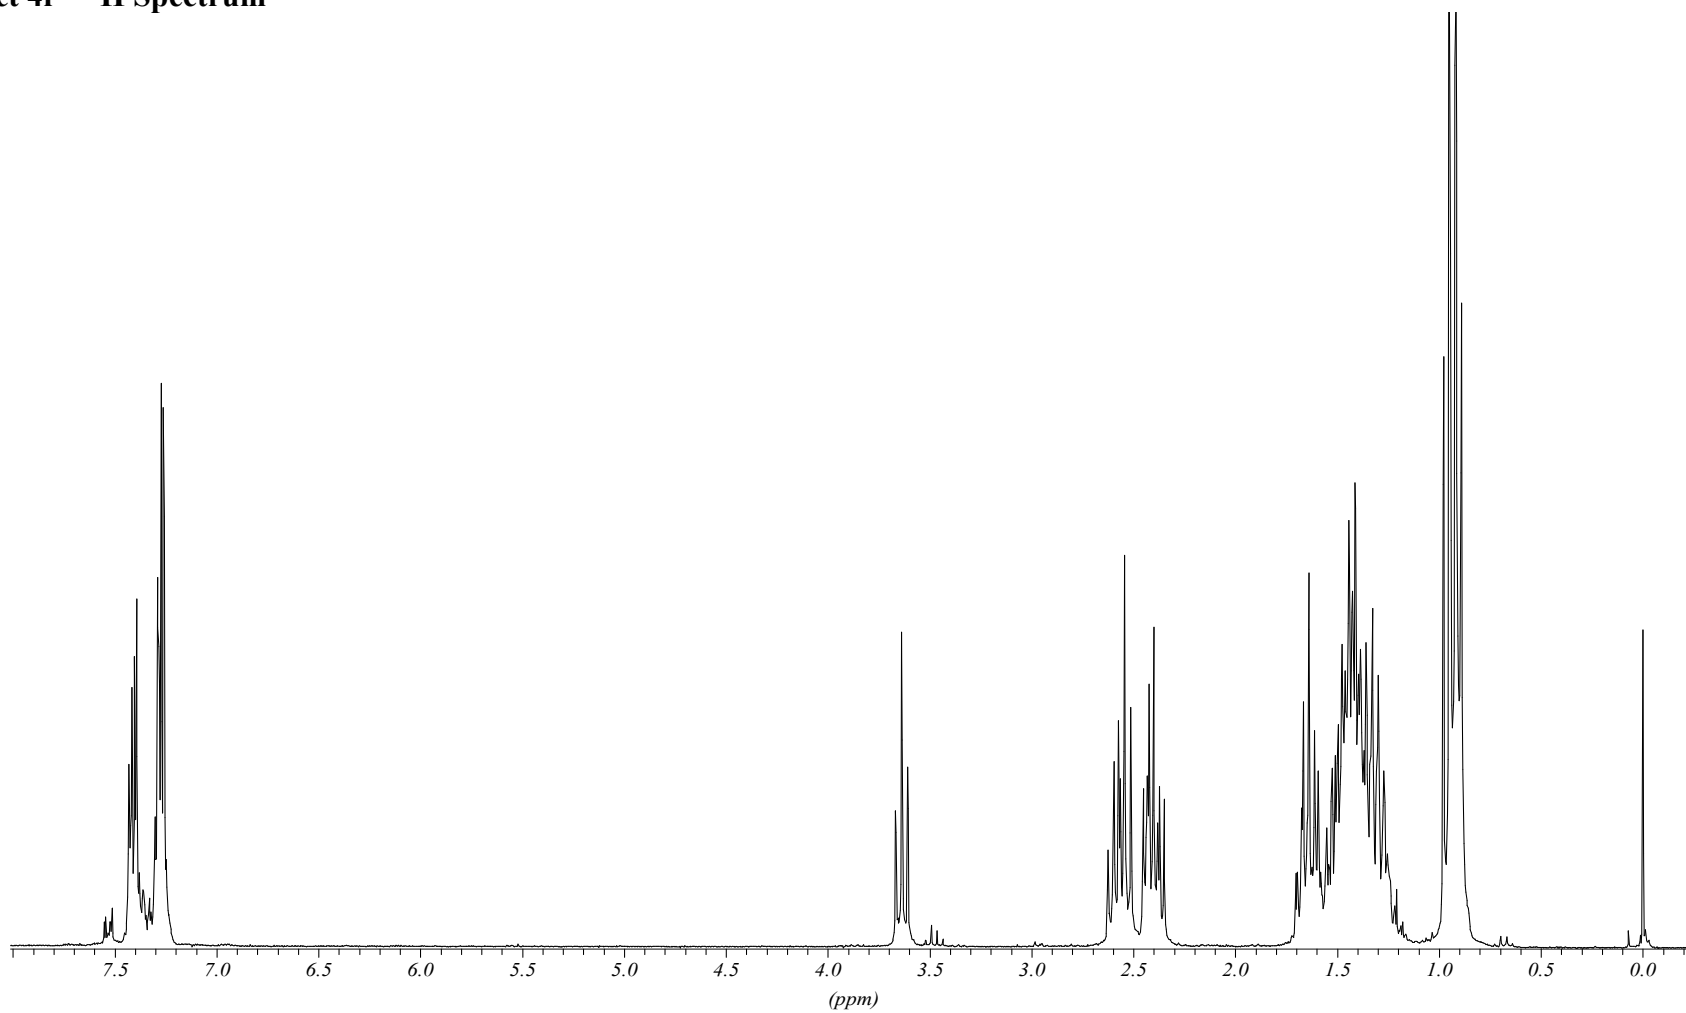

**Product 4r –  $^{13}\text{C}$  Spectrum**

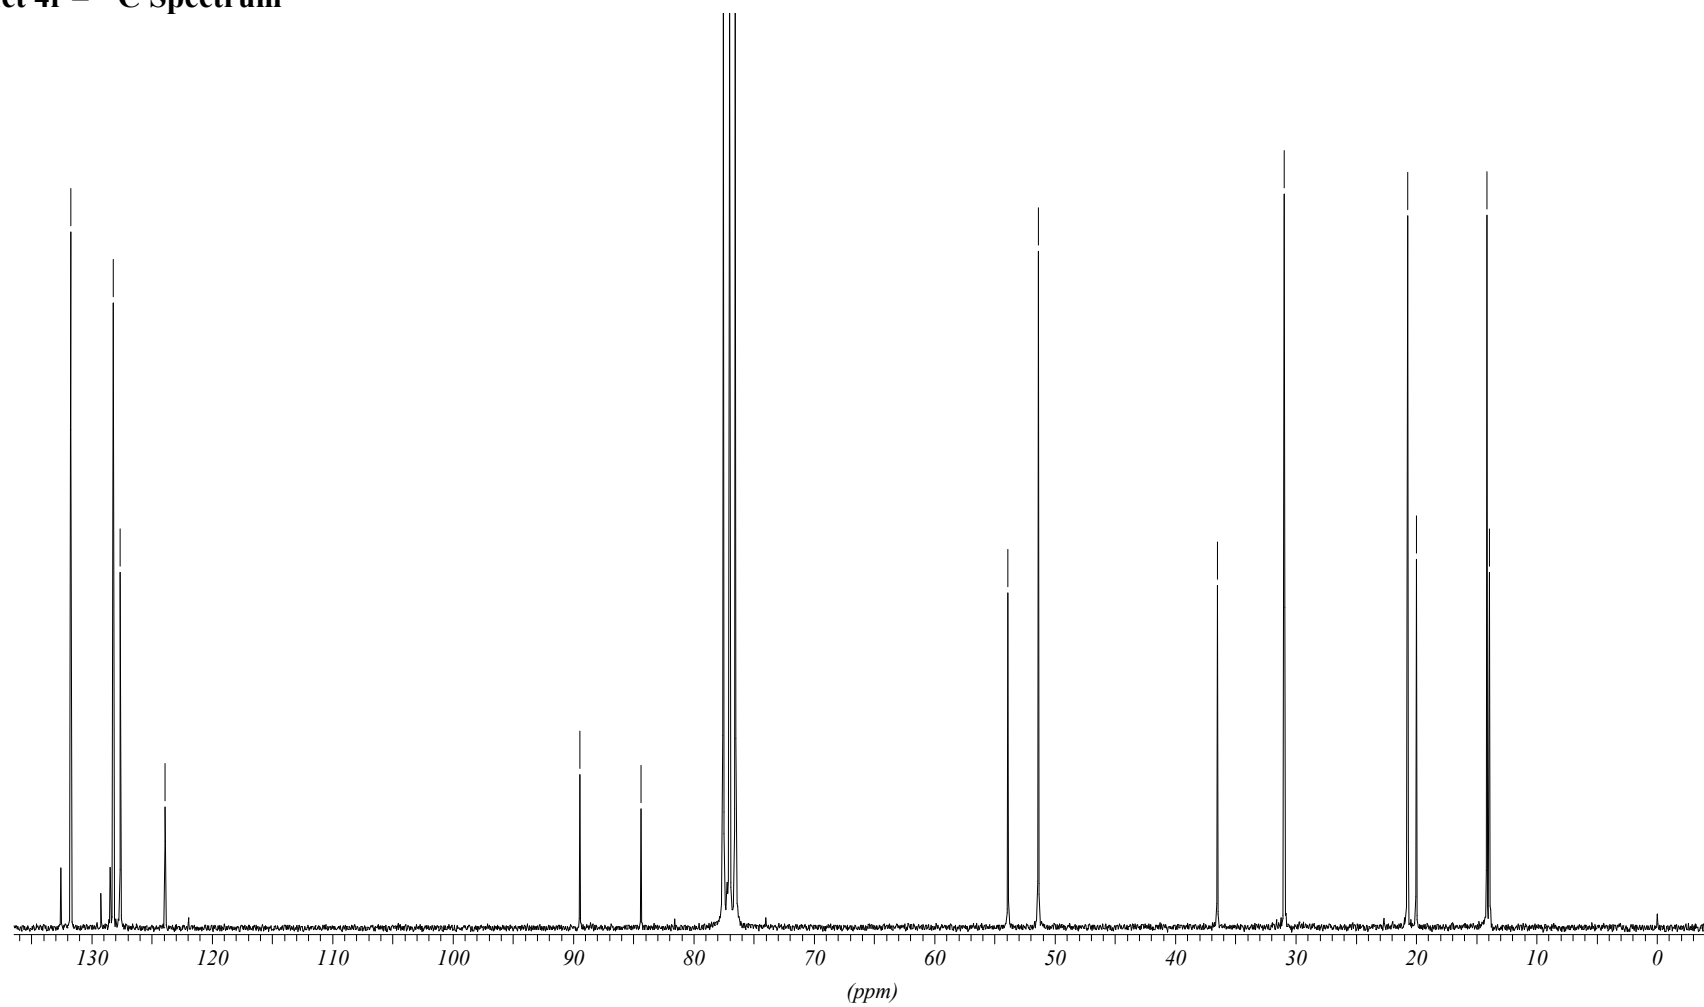

**Product 4r – IR Spectrum**

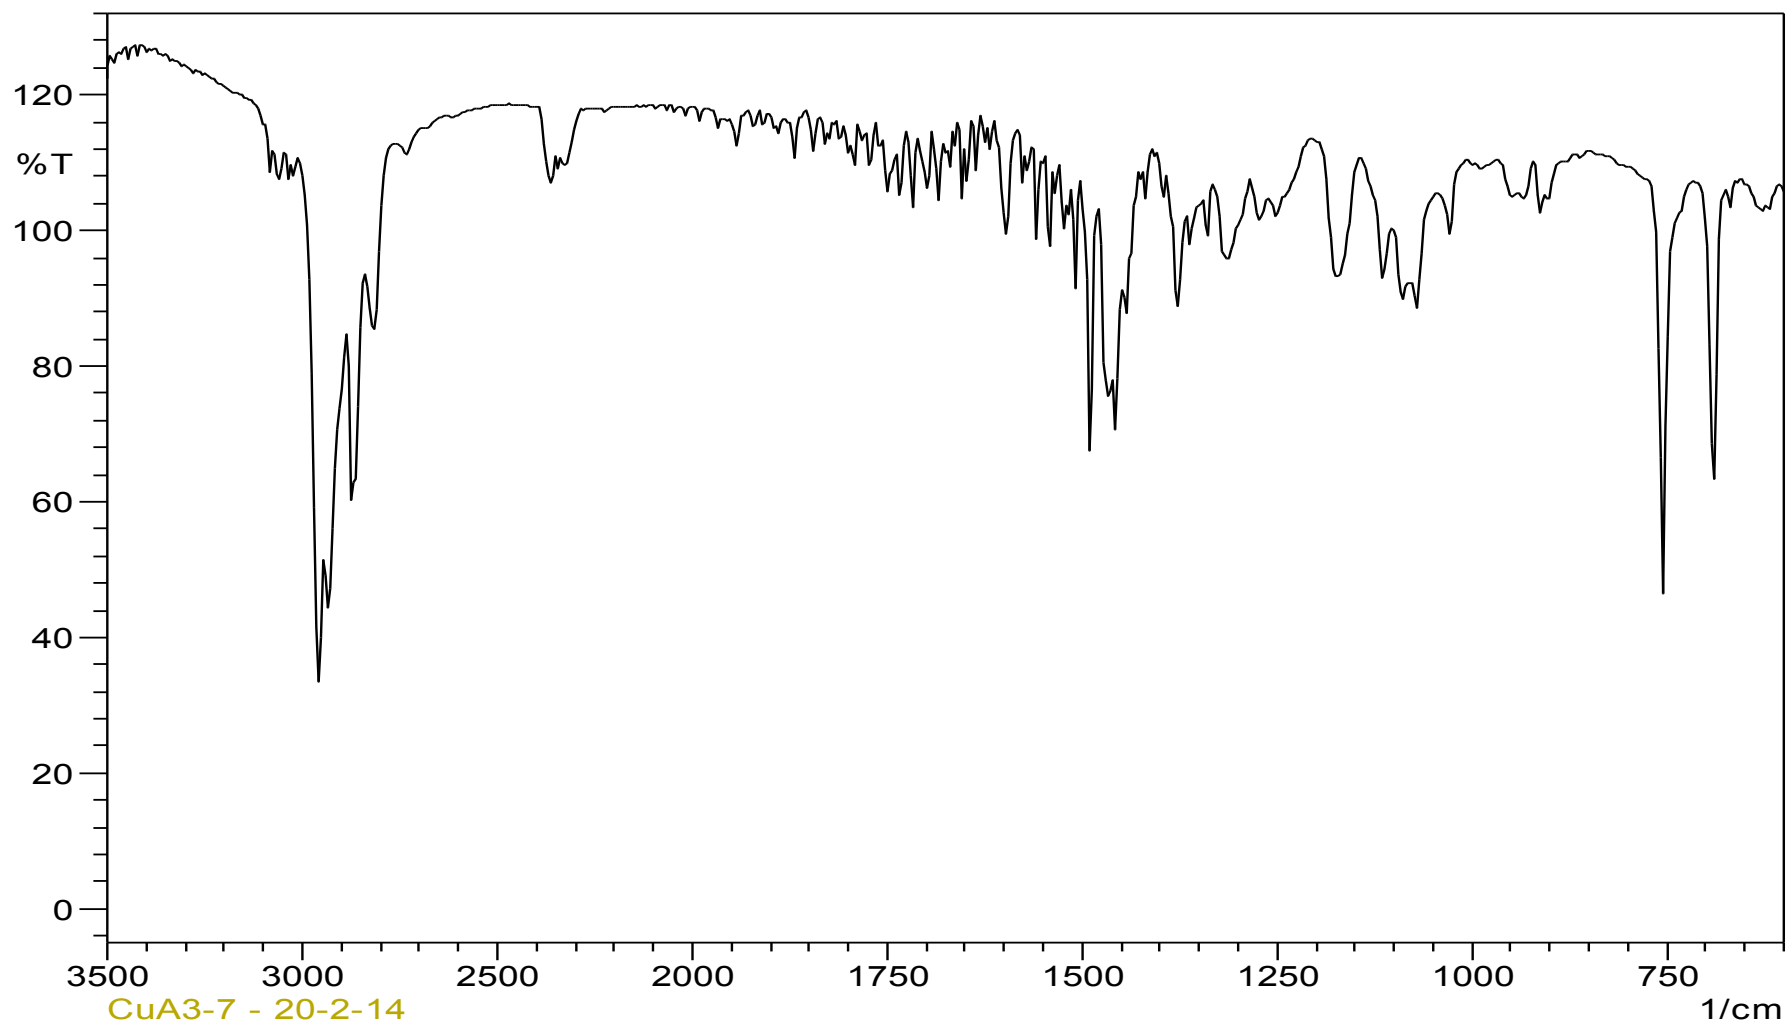



# Product 4r – GC-MS Spectrum

RT: 0.00 - 28.84

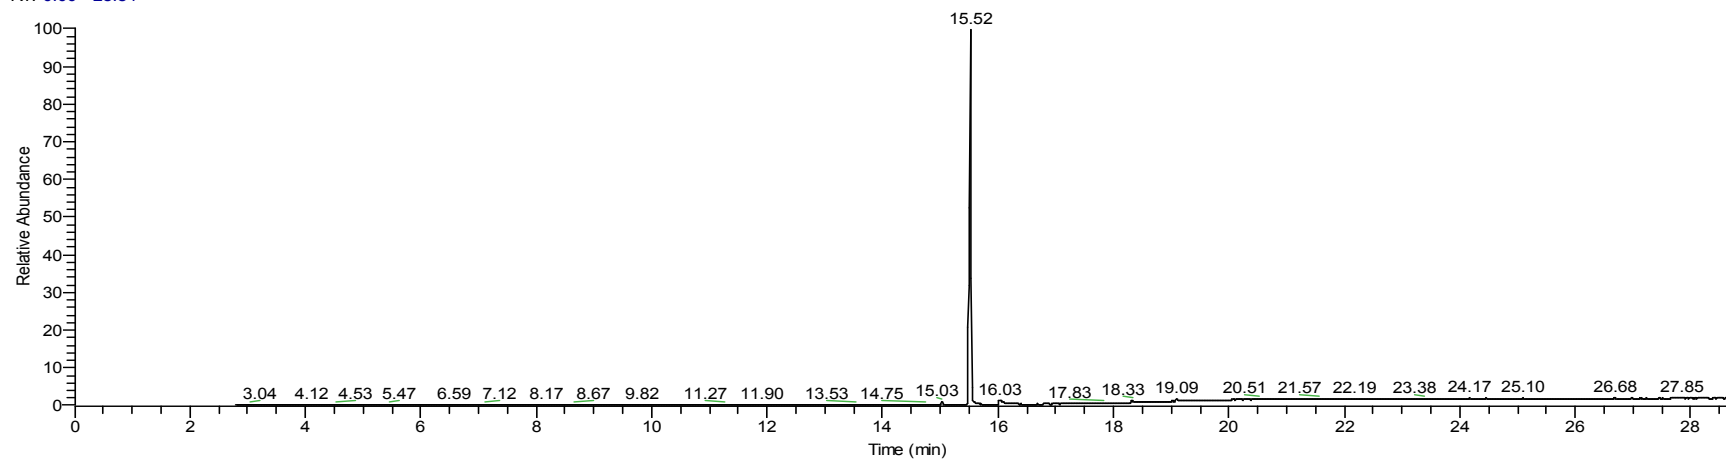

NL:  
1.07E8  
TIC F: MS  
CuA3-7r1

CuA3-7r1 #1004 RT: 15.54 AV: 1 SB: 2 16.64, 24.80 NL: 9.53E6  
T: + c Full ms [ 30.00-400.00]

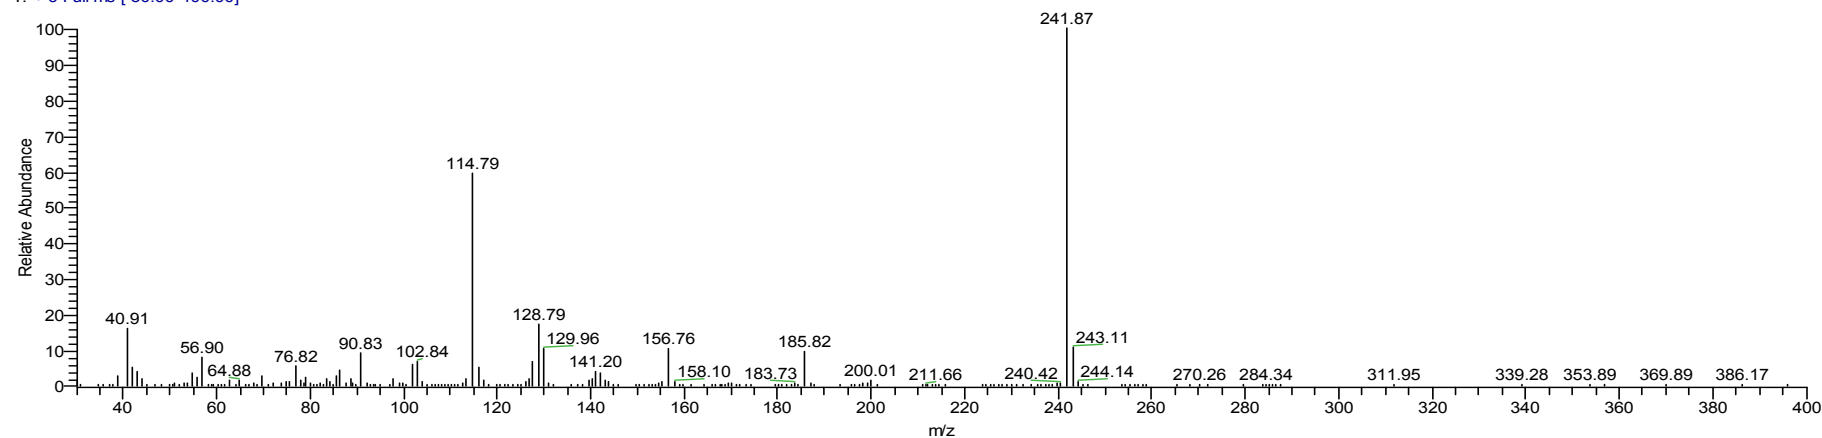

**Product 4s –  $^1\text{H}$  Spectrum**

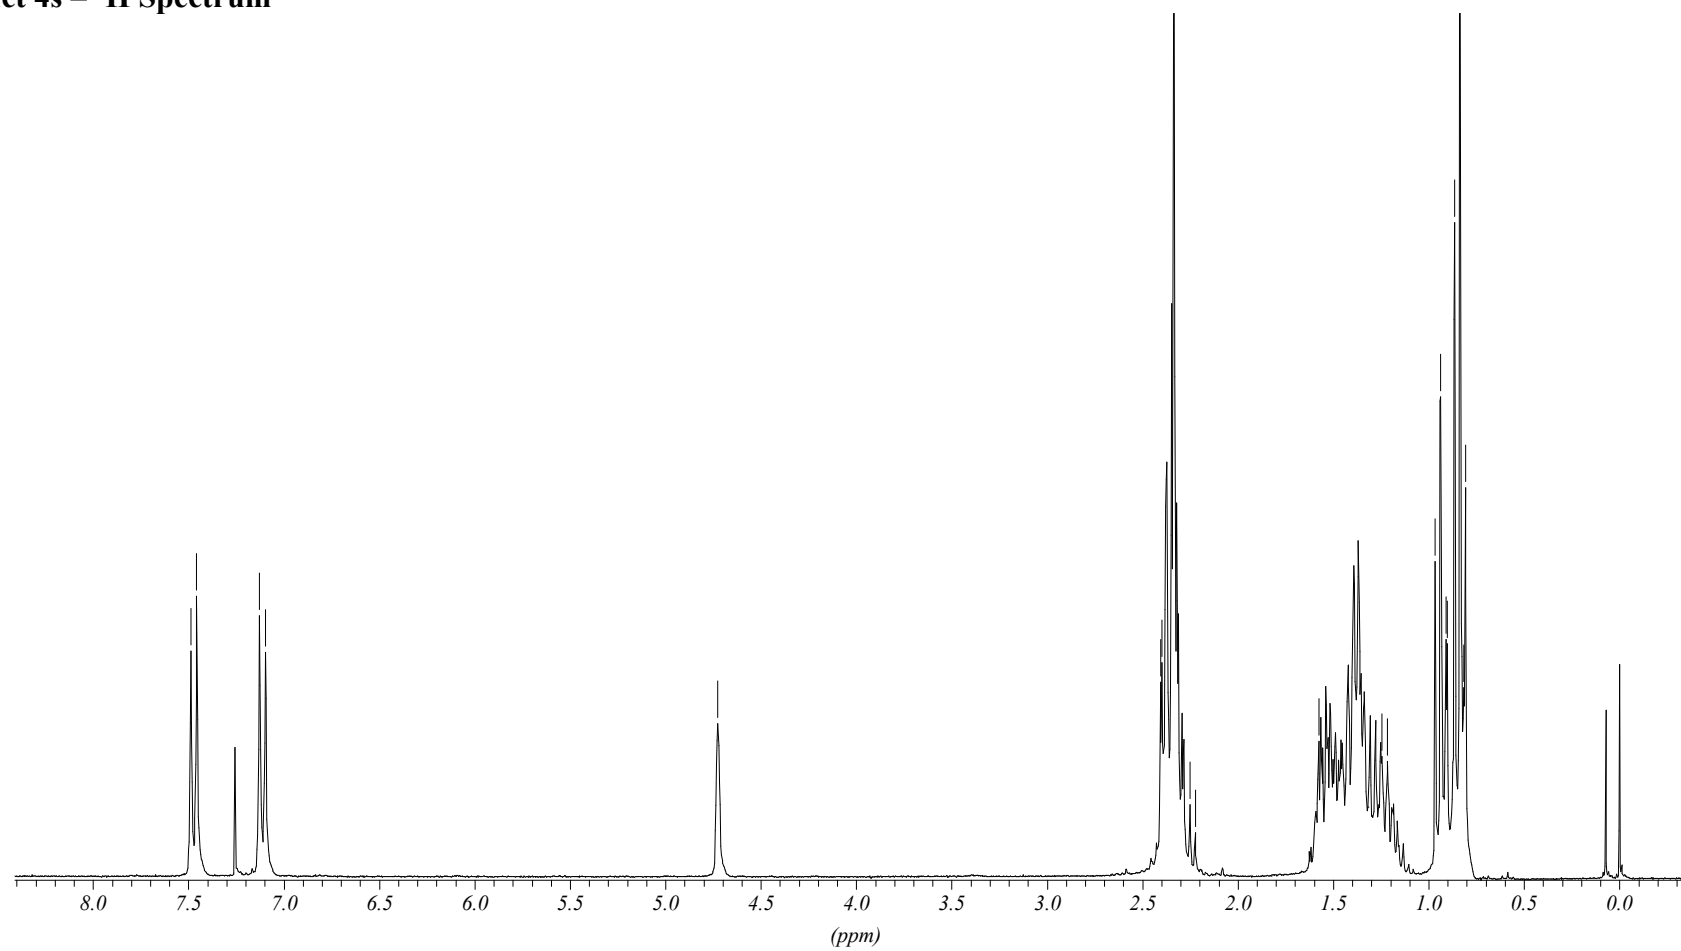

# Product 4s – <sup>13</sup>C Spectrum

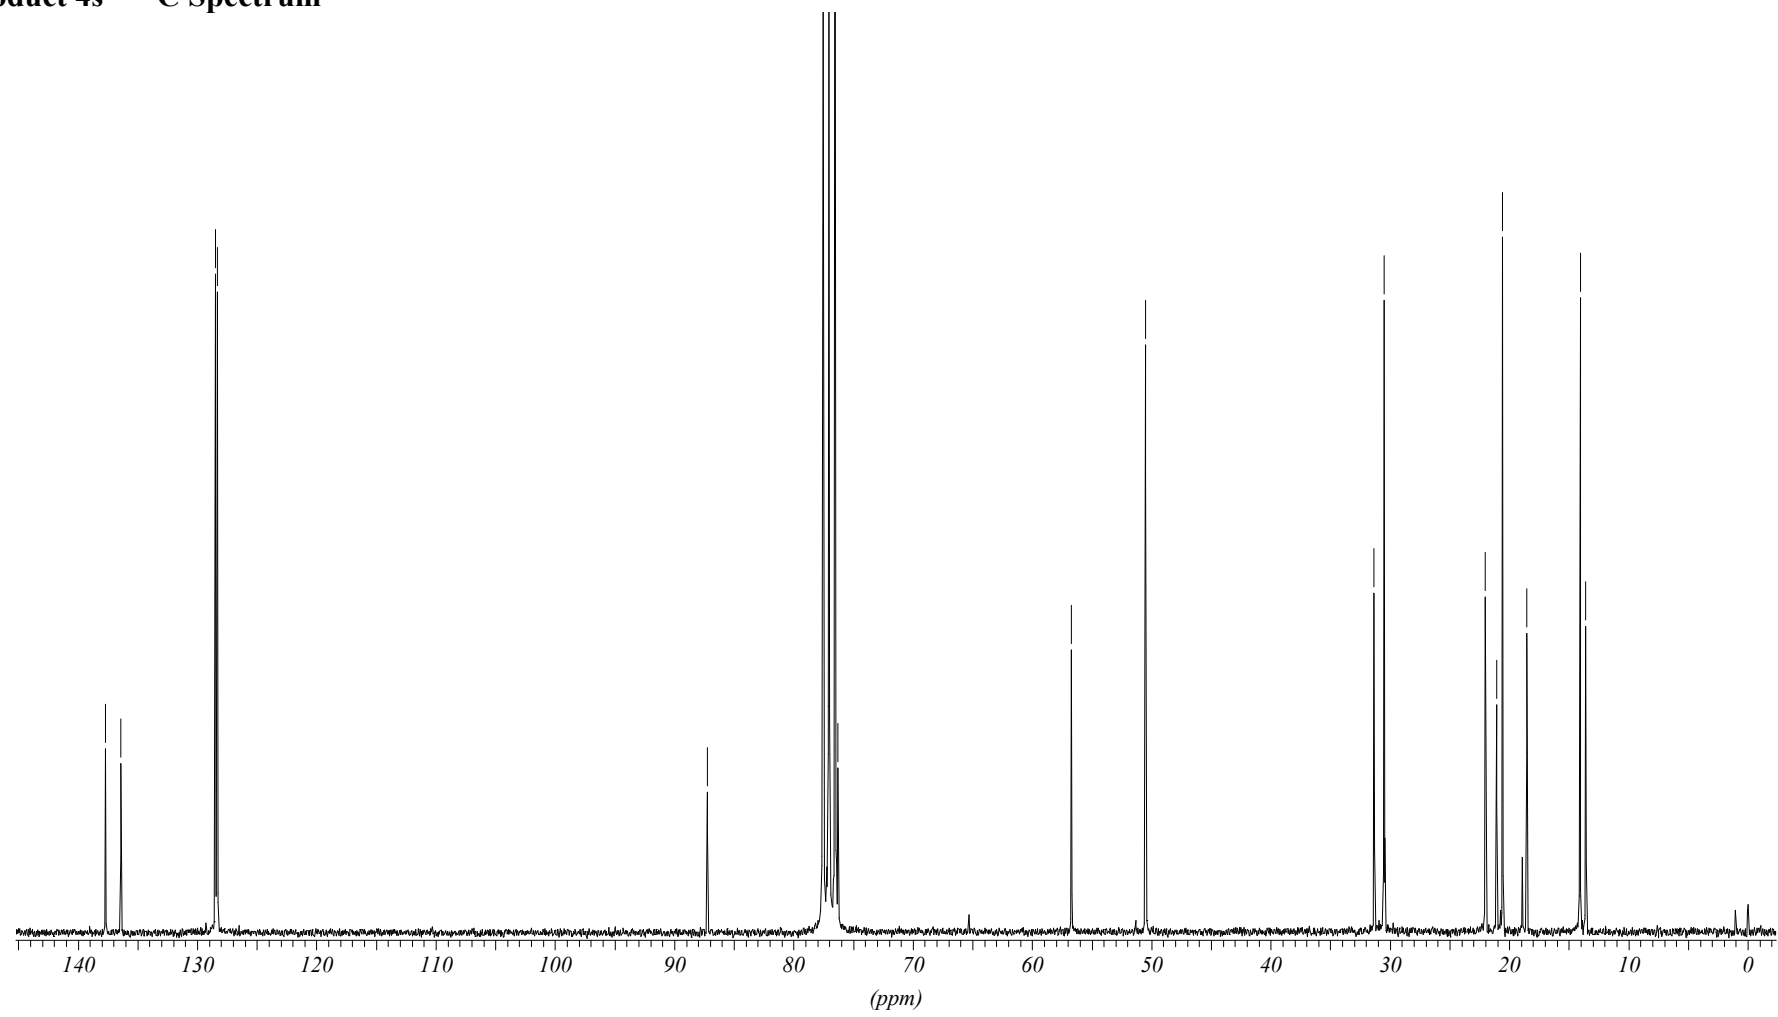

**Product 4s – IR Spectrum**

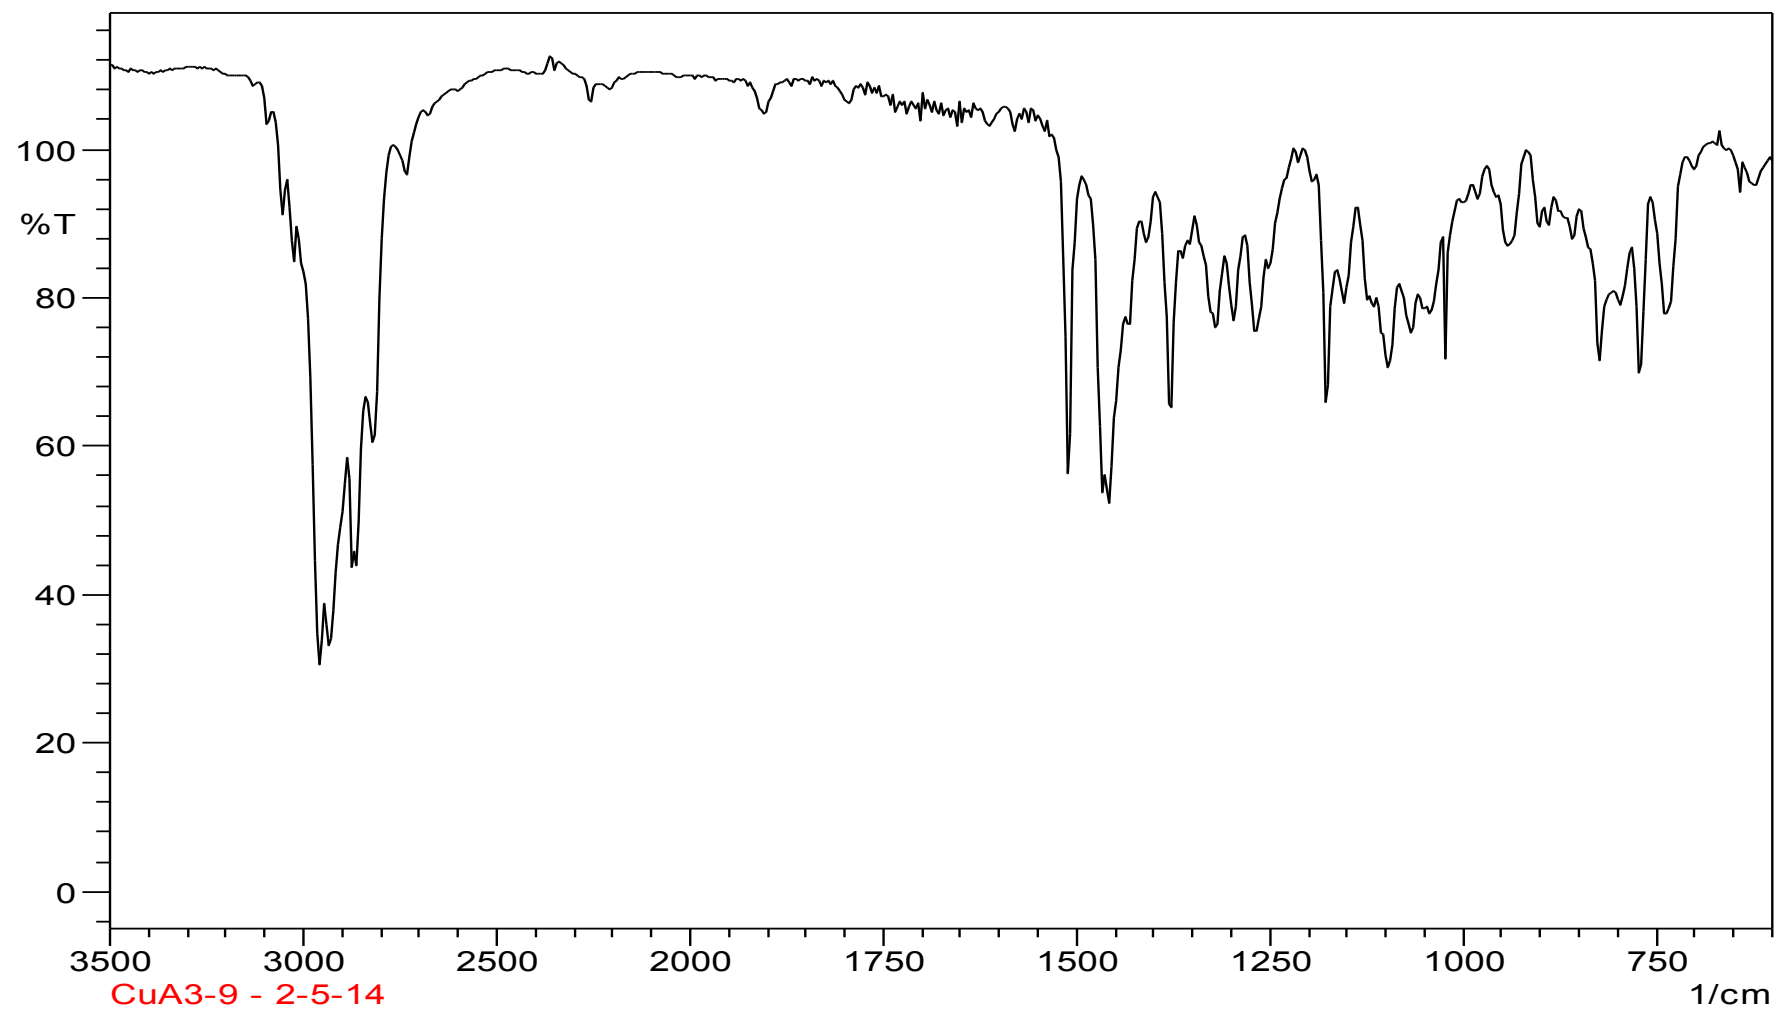

**Product 4s – GC-MS Spectrum**

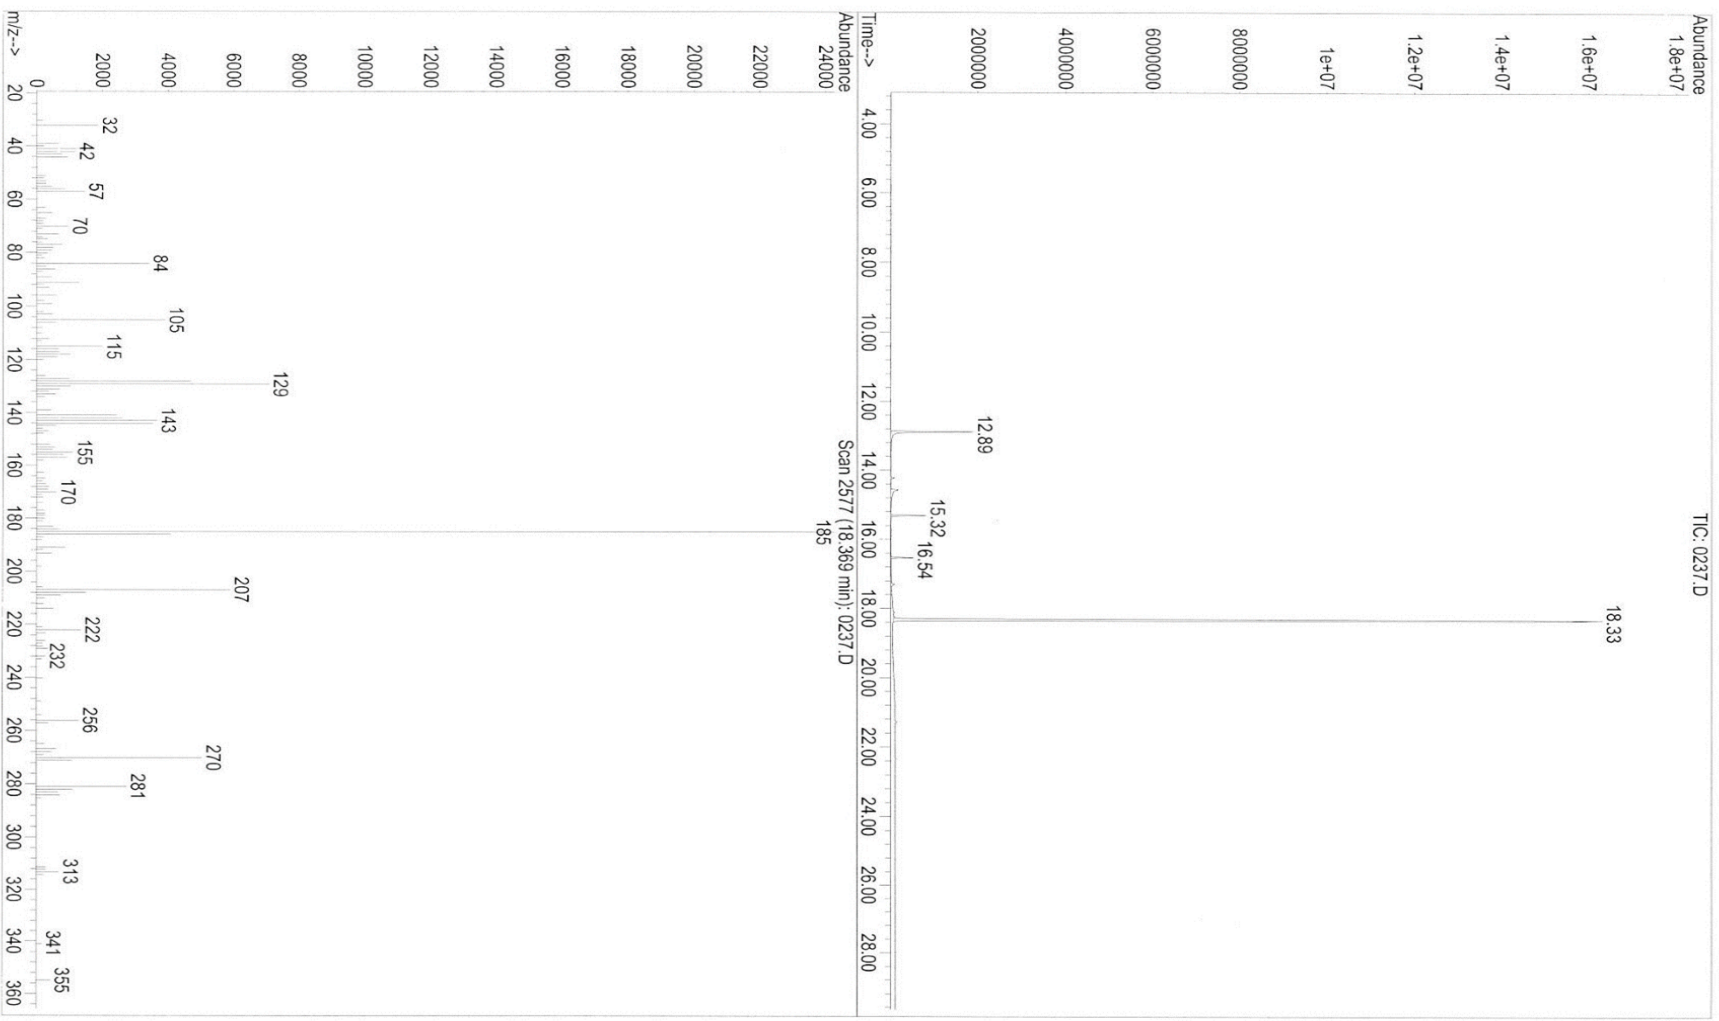

**Product 4t – <sup>1</sup>H Spectrum**

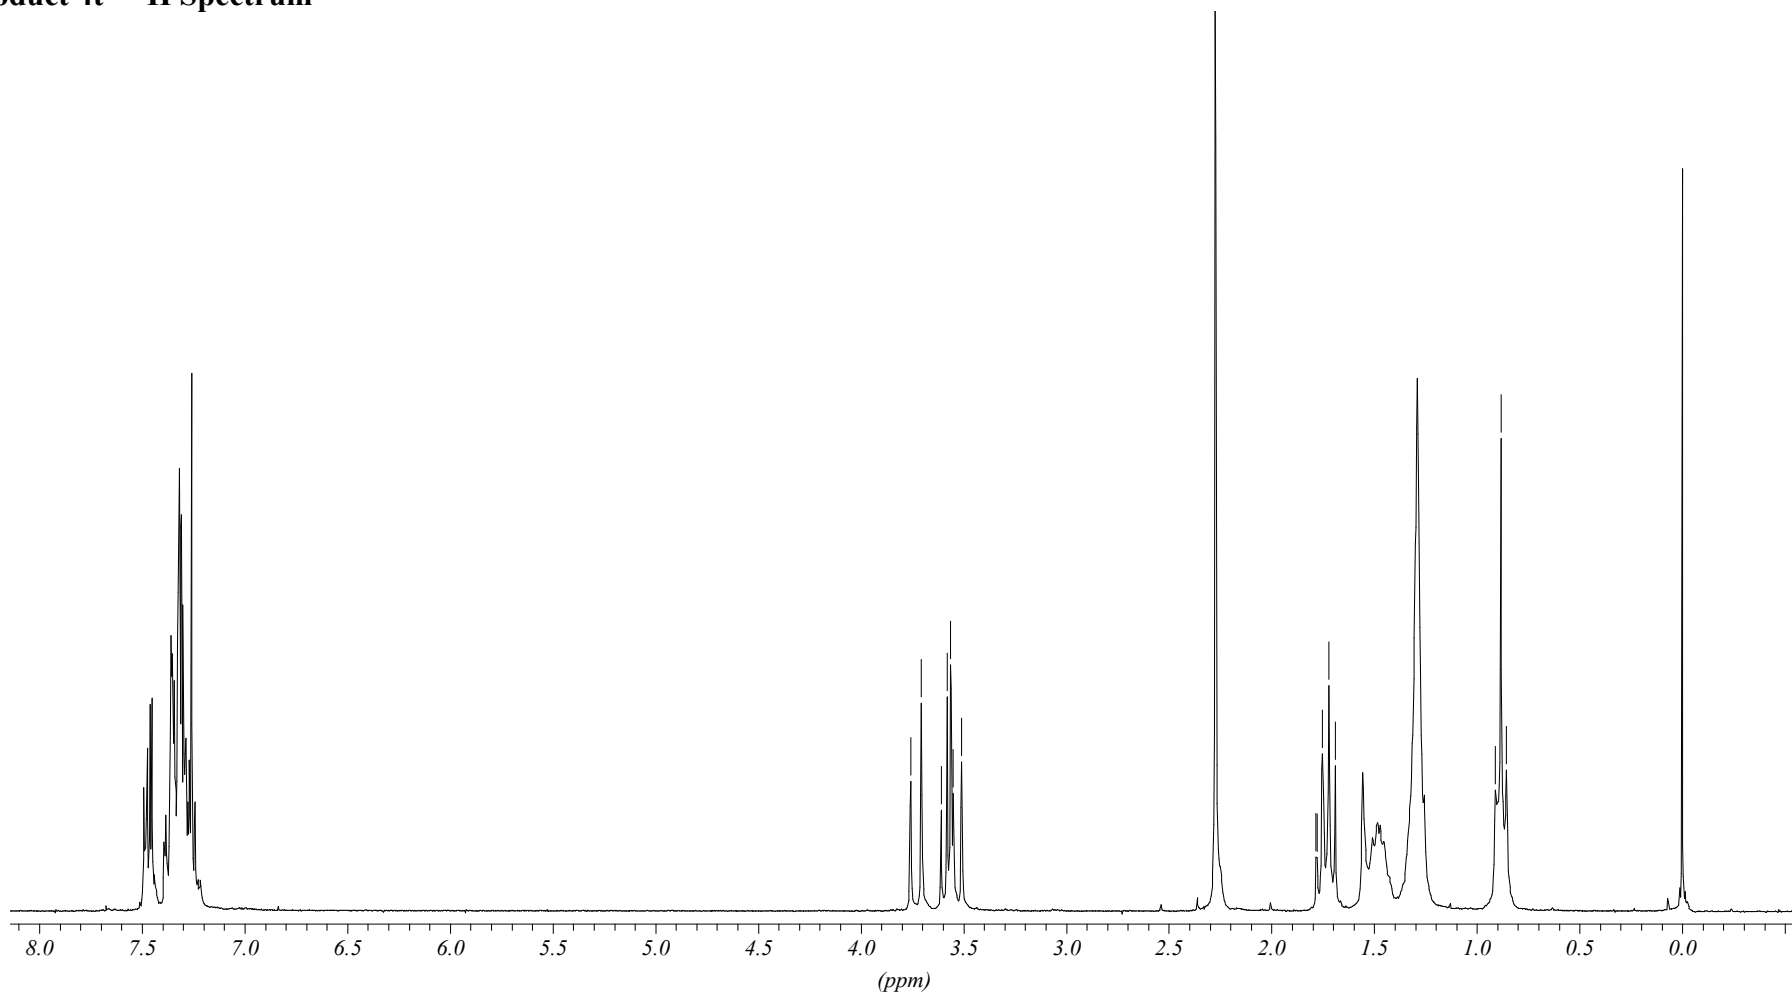

# Product 4t – $^{13}\text{C}$ Spectrum

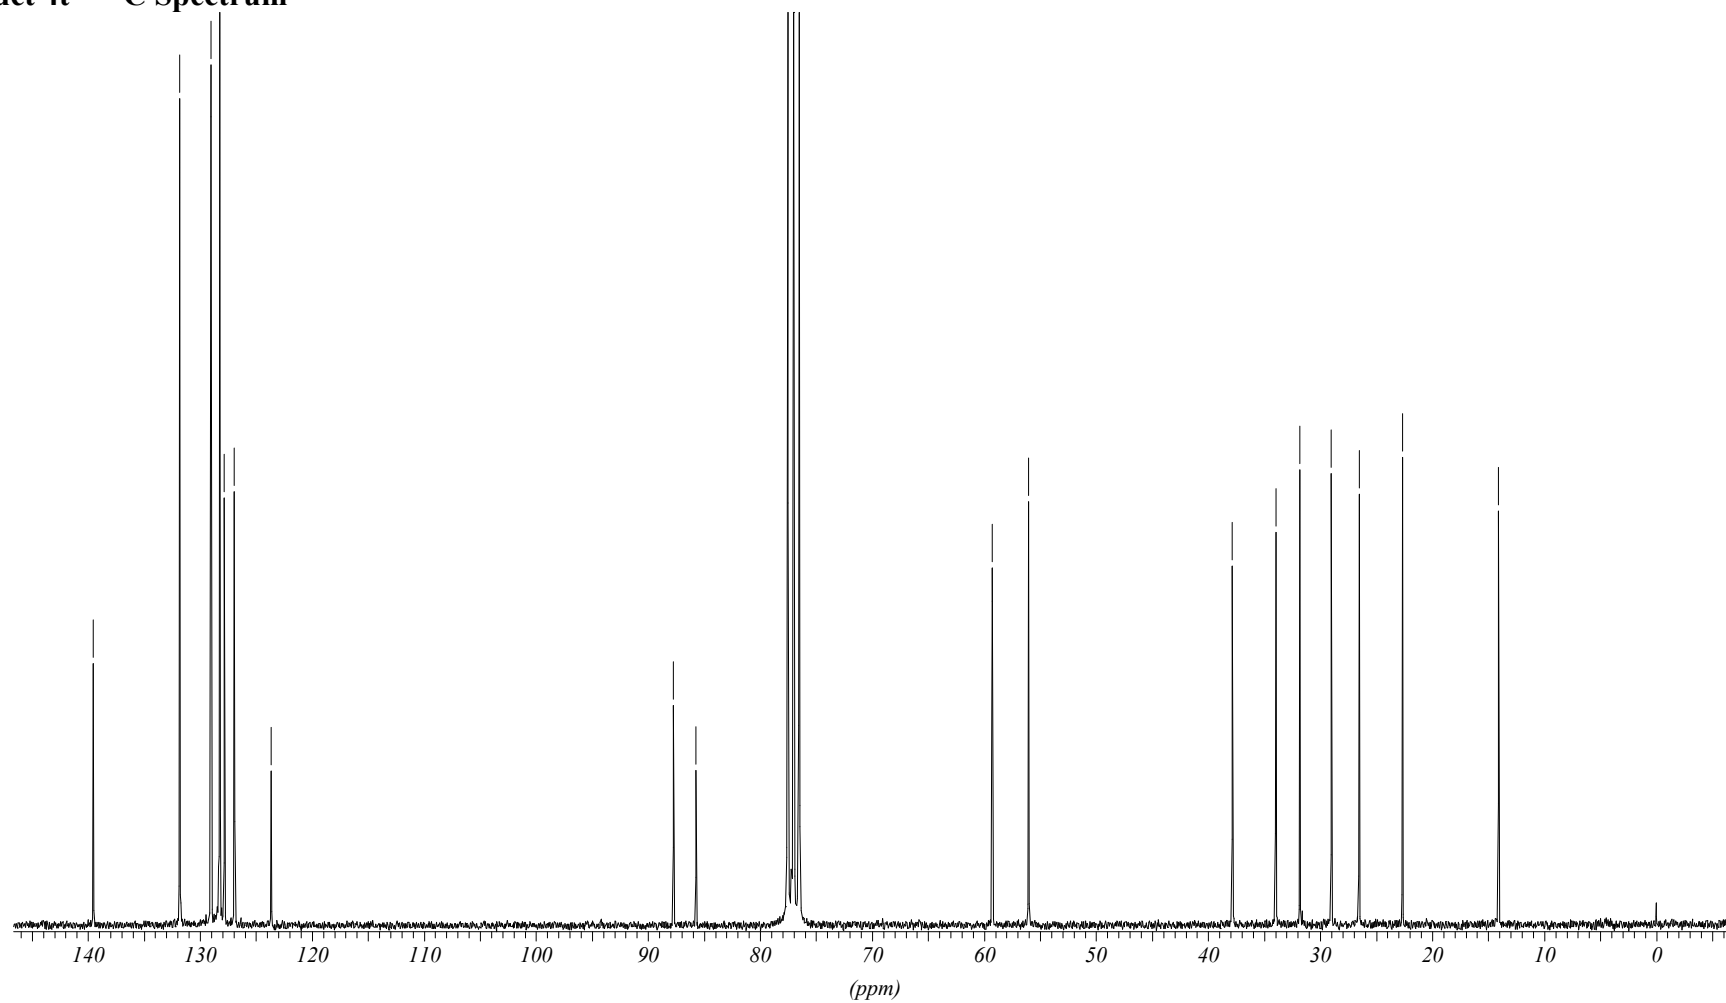



# Product 4t – IR Spectrum

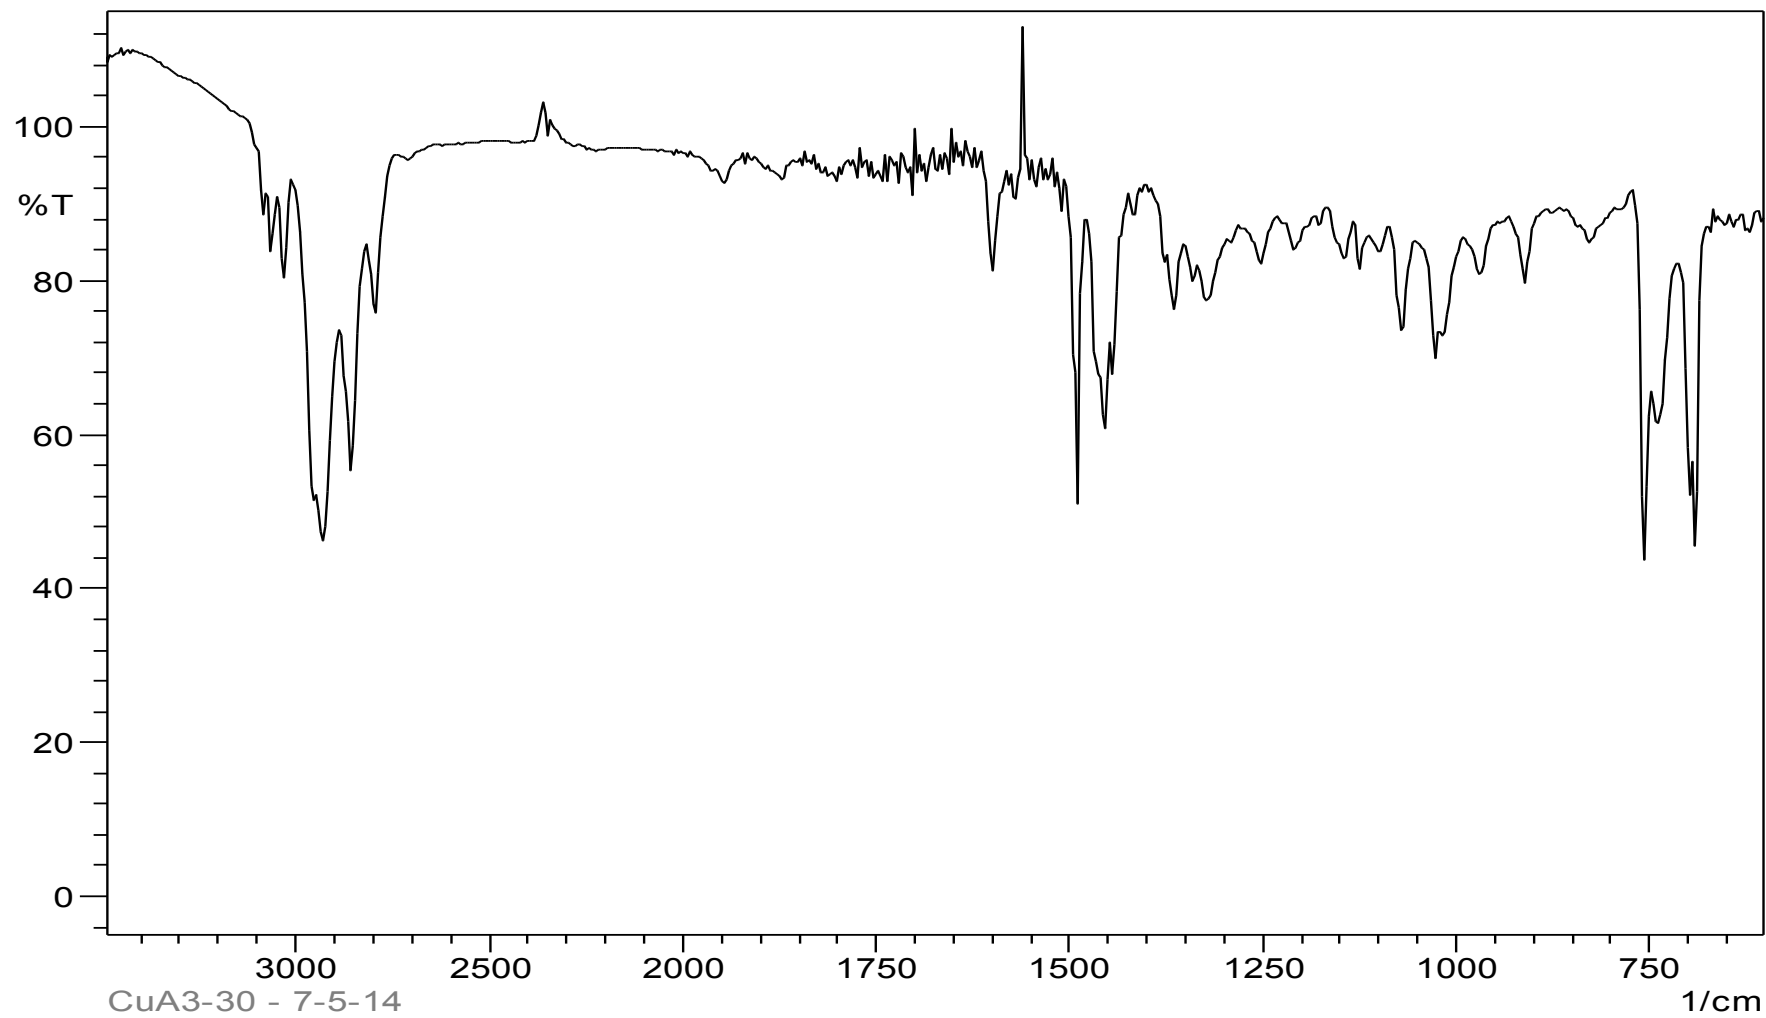

Supplement: c5ra05546f1.pdf [file c5ra05546f1.pdf]
